# Supplementary material for: Image Processing-Based Detection of Pipe Corrosion Using Texture Analysis and Metaheuristic-Optimized Machine Learning Approach
Source: Comput Intell Neurosci. 2019 Jul 11;2019:8097213. doi: 10.1155/2019/8097213 (PMC6657638; doi:10.1155/2019/8097213)
Supplement: Supplementary Materials — The supplementary material of this study contains the dataset used to construct the machine learning-based model. The first 78 columns of the dataset are the extracted texture features. The last column is the class label (0 for noncorrosion and 1 for corrosion). [file 8097213.f1.csv]

165.4052	156.9156	137.888	14.1843086881244	21.0694204153793	40.1308491811474	-0.427285277242974	-0.0503004952654813	-0.384086705472007	2.39041290014834	2.10094642201913	1.69673257850737	5.75743905033506	6.32059981470187	6.73993616253395	81	99	140	0.00172394835485213	33.1065306122448	0.00260700574488048	9.5879850470212	0.00139662582720164	51.2525510204078	0.00252406679307091	9.81868040313095	0.00193819241982506	18.9930612244898	0.00268273486296598	9.38729623638052	0.00146804720579253	45.7321949187839	0.00257421029871634	9.76300430809119	0.906847903612002	0.213204951856946	32.8945437872536	1710.82026593306	0.8724	4.20191266229026E-05	24943.4662998624	3.82834127396433E-05	22509.9919565439	8.5761776342151E-06	5551.99358092618	0.896844546820295	33.1372053872054	36.9276094276094	1842.05050505051	0.9504
196.5752	209.246	221.204	9.85163666402695	9.54521262204253	9.00404264761113	-0.175762707218452	-0.2283760514208	-0.362734343560419	2.33171229499789	2.50735433933472	2.54187947500223	5.29218209228813	5.25183575610986	5.1396443090548	57	60	58	0.00340024989587673	11.9869387755102	0.0103141692641099	8.61021514828388	0.00245015097875884	25.0293367346938	0.00957997064953288	9.03137064132565	0.0029171178675552	17.7179591836734	0.0101693844759972	8.81707740183358	0.00241586830143833	25.52436484798	0.00963175551836653	9.0545069090819	0.887009193590753	0.273758865248227	61.9238770685579	1576.39669030733	0.846	2.33113307158064E-05	42850.0174940898	2.06800741801022E-05	38005.6164716312	6.38199500314446E-06	11725.1791962175	0.885287568902425	33.6544211875267	66.9769329346433	1758.70781717215	0.9364
142.1756	148.0152	149.4608	19.1207731182607	22.3173423363984	26.5655954828797	0.404396088923806	0.206358024182774	-0.105953273434137	3.13835415040373	2.89316653878919	2.92779513413801	6.17886408782566	6.39574845546853	6.59987692691035	116	145	169	0.00152269887546853	24.7510204081633	0.00210108168507851	9.70732235277623	0.00127587174325514	53.5459183673467	0.00207255232348413	9.93634387670698	0.00161665972511452	23.7910204081632	0.00212767406496173	9.62038073397055	0.00133309024890885	31.234485630987	0.0021435365444152	9.86117060829547	0.906503365458161	0.213400642496558	30.3813675998164	1708.11794401101	0.8716	4.91738951447315E-05	21957.8343276732	4.45436415561574E-05	19945.6991101933	1.04391129891071E-05	4650.13446535108	0.900768782789365	32.7974155898291	34.8732805335557	1876.77073780742	0.9596
208.6516	102.4892	85.5232	22.4326685314075	22.1729989708203	20.1221634463096	-1.79129986769373	1.80738851965209	1.89292911347136	6.54269736281767	6.82150636135069	6.89449841690482	5.8186917762837	5.87525929842797	5.84189877565777	137	152	139	0.00491028738025826	85.4118367346938	0.0023573097431876	8.79906106163975	0.00441583946503785	139.809098639456	0.00227347122092236	8.93158639377187	0.00505522698875471	87.5636734693877	0.00236597502976635	8.82046074138119	0.00388166044239859	158.919200333194	0.00213772360998119	9.07408770415341	0.880490134932131	0.370352486721391	59.2201834862385	1519.80927088363	0.8284	5.93586087306538E-05	18206.4480927088	5.17204102512888E-05	16255.5468014647	2.32489792501938E-05	6065.26557218735	0.854566244187801	35.6399278954484	61.7363677332132	1538.20324470482	0.8876
222.366	114.6628	102.9668	9.42015095420451	31.5630463700829	36.2081772222795	0.604414492288248	2.20982408282427	2.21912062497954	5.42448531861505	7.04168520146169	7.30542839393356	4.98154257405088	5.35540258110356	5.87737830509357	70	152	162	0.0108451478550605	107.259183673469	0.00164879299152703	8.05675779392111	0.00917116421398455	178.250850340136	0.00156552656464206	8.23304782478815	0.0106835485214495	149.32693877551	0.00162320732479844	8.08391414772835	0.00869847892407701	274.531861724282	0.00141161813170786	8.3392398517981	0.860796658857653	0.475903614457831	93.8785140562249	1390.67670682731	0.7968	4.79558905728939E-05	22472.2926706827	4.04881625337577E-05	19815.872044846	2.59852597848795E-05	8753.53212851406	0.848051199494982	35.981355161437	102.768985902683	1497.54206457481	0.8796
214.9328	160.426	160.6824	14.6459920852088	48.5156688503827	56.8193130039426	-0.355367118809121	0.03960240895587	0.0227799030842663	4.14102529728667	1.3692395489884	1.39681677285997	5.79503729648257	6.6375082874773	6.92324010707269	100	141	164	0.00240499791753429	115.08693877551	0.000829987054180898	9.65707422700437	0.00190314220926475	168.732993197279	0.000815061743568714	9.82244876561759	0.00214977092877959	151.475918367347	0.000814165881946007	9.77040270589649	0.00173969578481541	302.310703873386	0.000760460091154872	9.96657626067828	0.911184411809698	0.240936209270307	33.5121615419917	1730.89903625516	0.8716	3.51022859148443E-05	32353.1835704452	3.1839286280944E-05	29432.1493295854	9.10192581607999E-06	7748.30748049564	0.89434552542461	33.3351671603893	38.6445196783749	1820.63520947948	0.9452
207.3412	162.1896	157.8844	12.9963372747863	49.7326698643859	57.927491199257	0.470916699900726	-0.338340644166403	-0.305235182841448	3.37026025407282	1.26018046336807	1.26186234350728	5.58684843399155	6.09569148294822	6.48998461461133	87	147	166	0.00324798000832985	69.8551020408161	0.000854503114677474	9.04242681733238	0.00267792065805915	129.62925170068	0.000834589255937079	9.28295480835941	0.00300141607663473	96.454693877551	0.000845912630651955	9.16981894243183	0.00243529655230073	167.693461057892	0.000819520924158604	9.38196543445656	0.887978234614577	0.284499054820416	47.9555765595463	1581.0179584121	0.8464	3.5847544843462E-05	32144.7906427221	3.15458818091055E-05	28699.3284404537	1.18057990406652E-05	8095.0652173913	0.890536607223894	33.7288280581694	53.9717707442258	1785.25320786997	0.9352
206.4376	185.386	190.646	14.6268966715432	42.3565084018973	49.8361222809319	-0.380372651020523	-1.02693948031462	-1.05145681171661	4.42944221805582	2.54589921215726	2.61189127290685	5.75991497449521	6.34513350020248	6.58890067875533	106	139	164	0.00220741357767598	81.7567346938773	0.00108197251539893	9.56839156223307	0.00179612661391089	134.444302721088	0.00106496664842695	9.75627690092463	0.00208846314035819	102.268979591837	0.00107408701846024	9.61524559774294	0.00166857450933693	191.411911703456	0.00102234889154312	9.83957765486762	0.91798923185555	0.225601452564685	40.4580118020881	1780.2301407172	0.8812	2.89719602442034E-05	37984.1225601453	2.64832283538024E-05	34875.1683995309	7.78602836253574E-06	7758.4126191557	0.904739208366035	32.8622704507513	44.7904841402337	1897.97412353923	0.9584
221.3456	106.8608	95.5644000000001	7.96751910195388	28.6424130156661	33.1799495575265	-0.666254868974487	3.09307414131703	2.99574458378517	7.80432114398739	11.7821007349958	11.306377942277	4.47806808655683	4.69363080799247	5.16991553876166	74	153	167	0.0217079550187417	63.0053061224488	0.00210919136225808	6.81333244392756	0.0174016034985427	176.03656462585	0.00195987597450391	7.13599738263694	0.0201999167013739	112.677551020408	0.00218347252342052	6.94155344424048	0.0173596625451597	144.74260724698	0.00211596447868406	7.12295912182013	0.782648639191396	0.904707884288145	125.673851389677	1002.40555870675	0.7052	5.16222676432088E-05	20673.6483267158	3.97228941011977E-05	16634.8403596985	5.02674891233726E-05	16254.9478162223	0.809781575685669	38.3355866731048	143.743602124578	1272.71897633993	0.8284
205.158	215.8256	226.0152	11.7318811790778	14.2570959399171	17.4493028216029	-3.35788235807179	-3.66928151104881	-3.73708232239139	17.5585280273199	18.7586102864273	18.8020790737627	4.7462574444859	4.69465365552174	4.92022320462611	102	116	137	0.0104773011245315	21.1828571428571	0.00492736074576247	7.68875731473434	0.00803701582673884	55.8567176870746	0.00439093037897401	7.99928557960538	0.00914952103290297	39.5159183673469	0.00474916920846638	7.81156680316403	0.00783496255985244	56.0541441066225	0.00445192275648891	8.02650736863466	0.851842174094999	0.40777666999003	112.68594217348	1364.98803589232	0.8024	2.23142671206476E-05	45588.2647058824	1.91717349680978E-05	38621.6930597251	8.59207882956077E-06	19256.1420737787	0.872773583829791	34.5560420315236	124.517513134851	1662.39754816112	0.9136
125.104	115.312	92.6472	18.0023660667147	17.2381975855946	18.5210888492011	-0.10066902460888	0.210700719826395	1.17586459030163	2.52593648283167	2.99266128075298	4.44184540862115	6.14110227559579	6.06681737007219	6.00761552722249	111	98	102	0.0024726364014994	14.0228571428571	0.0033573619679042	9.08243754491607	0.00212874265352398	21.8681972789115	0.00343528210145518	9.27235309643905	0.00267988338192422	12.0106122448979	0.00349266337649786	8.98509932937474	0.00208593496982809	22.0112453144523	0.00345967906013865	9.30458665438829	0.87298704235845	0.275862068965517	36.4386973180077	1499.5632183908	0.8352	7.80893005561289E-05	13792.8433908046	6.778020492568E-05	12130.6646479885	2.25869443149843E-05	3545.2662835249	0.858965301183541	34.8603623508617	40.1701281484755	1583.78656650464	0.9052
128.3956	125.3904	113.2404	24.623450218034	28.6075582292512	35.4151409405638	-0.105406480659263	0.0556213809393887	0.373722242540491	2.0656207973073	2.24916377147577	2.23271241613971	6.48259972064172	6.71661689980106	6.96096658577317	141	161	168	0.00141740941274466	35.4404081632653	0.00125635188976744	9.83385888130998	0.00110052524411125	64.1411564625846	0.00128665098724966	10.1301104376036	0.00124947938359016	42.7253061224488	0.00130360923445613	9.97626311208586	0.00108780858177065	65.8754685547692	0.00128497059933289	10.1488400895005	0.90179684296843	0.22140221402214	23.7121771217712	1678.05904059041	0.8672	7.34554365339718E-05	16551.2320110701	6.57413108718222E-05	15037.6355036644	1.80183728207758E-05	3287.04935424354	0.904335290351483	32.7809246147439	27.9529362765514	1898.54768846314	0.9604
203.5592	190.1576	196.8688	9.43614833287396	37.4862102944536	43.0005161196933	0.00564307550185985	-1.02246457562249	-0.965343918640918	6.04758831352123	2.56342889773762	2.43965314043039	4.99334165064513	5.82226601612588	6.09628714731917	82	133	146	0.00711703456892961	24.4257142857143	0.0012913127899237	8.51007021342594	0.00523291799713084	170.248724489795	0.00117711144199625	8.9241211949714	0.00646930445647647	158.570204081632	0.00118605805912562	8.77671125064454	0.00554659215469884	176.37026239067	0.00117225096729627	8.85989932571237	0.857242931301082	0.41351888667992	61.0854870775348	1388.82504970179	0.8048	2.90277713700107E-05	37716.9363817097	2.54890731961692E-05	31648.6316010879	9.72432009345818E-06	18123.1540755467	0.869924747613043	34.5611038107753	69.4800700832238	1647.42137538327	0.9132
150.4784	151.7276	146.604	19.319356444768	21.0953596376075	23.7750958778298	-0.0566192313059398	-0.0602644419994203	0.170700997636605	3.00806587528228	2.72056390870569	2.36728978321061	6.07593149211402	6.27867432522383	6.49029525696842	141	152	147	0.00224773011245315	18.0261224489795	0.0023320161403562	9.18077513635577	0.00173972650284605	36.2249149659863	0.0023725995367515	9.51882728292246	0.00210345689296127	27.8926530612245	0.00239856250078221	9.26115213510828	0.00179173574248269	41.7238650562265	0.00236003055345454	9.48496985966837	0.862804987004548	0.326510721247563	30.1345029239766	1435.86257309942	0.8208	4.59769402282669E-05	23181.5623781676	3.96762913817347E-05	20012.497348251	1.52293824622195E-05	7436.87524366472	0.864661318701591	34.7778757161745	34.7267518730718	1614.10004407228	0.9076
118.1324	122.0008	121.29	13.0929167964973	15.0133806772492	15.8962983112421	-0.0485599139840526	-0.107727852527332	-0.115492420223698	2.61755235702433	2.60069670531068	2.49033708144109	5.72613068362421	5.90839960045671	5.97956735455801	72	85	88	0.00149837567680131	36.944081632653	0.00439369101082082	9.73489674897773	0.00138071810356798	45.3596938775507	0.00432703644536769	9.82471814410989	0.0012551436901291	61.5906122448978	0.00409957265144172	9.96365210538892	0.00103264622664339	126.770095793419	0.00336251331265477	10.1811759415284	0.935268136106229	0.133567662565905	44.0738137082601	1921.97891036907	0.9104	7.06515958361168E-05	14779.3308435852	6.61422678123497E-05	13813.4861458944	9.38428558705872E-06	1969.7065026362	0.911036989077451	32.5279040926002	47.0926002480364	1949.05374121538	0.9676
132.0292	135.7912	136.9964	38.0075406644524	38.3106095299983	38.8280773029003	0.0954109061288935	0.0877757138964806	0.0800931139580378	1.16197262512395	1.15985750588007	1.16963234365234	5.84399378030037	5.76339642127403	5.85987720569578	111	110	114	0.00452244897959182	101.043265306122	0.000662104874115662	8.66254099835489	0.0039827155351937	135.154336734694	0.000651719235438859	8.83342742322576	0.00499725114535615	36.5142857142858	0.000673350732245259	8.48941826119466	0.00397637316535296	129.171178675551	0.000652967661521601	8.82984964689116	0.857525843007186	0.417910447761194	45.1393034825871	1388.63084577114	0.804	6.97212213063991E-05	19208.6756218905	6.02935480914105E-05	16201.1647113046	2.65260212564304E-05	9121.44925373134	0.834614909710343	36.4026691210308	49.5301426599172	1425.99585826047	0.8692
113.6364	119.1576	119.2232	15.8420262289898	16.4702629681496	17.1566599826423	0.040558247398057	0.0502369322881612	0.175933116756769	3.11902601387591	3.04125214293468	3.07558892920936	5.80196943416028	5.85958418068347	5.90348428754623	86	86	91	0.00325597667638488	11.4485714285714	0.00368047239012196	8.96653247655495	0.00225275059003189	41.1568877551018	0.00357207566162912	9.45730911335241	0.00267421907538529	29.2689795918368	0.00367169579452395	9.28362147785308	0.00237284860310008	34.689296126614	0.00362784681474705	9.36885639008432	0.884768664933117	0.300759013282732	47.8776091081594	1561.62428842505	0.8432	7.58538025187151E-05	14033.6764705882	6.72861654298306E-05	12392.1219864947	2.20904087822624E-05	4405.48292220114	0.894019821222655	33.4490662139219	53.1663837011885	1814.79711375212	0.9424
90.5868	52.8072	41.1444	10.7136205719635	15.0775736827913	13.3815226577546	0.483022163568583	0.916024162913622	0.887713387535181	2.39178342500293	2.48239493916645	2.48962059348912	5.22446115932691	5.35109209524728	5.23598122590229	56	64	58	0.005847563515202	6.18938775510205	0.00558297061351585	8.12625764591632	0.00469422462862705	15.0854591836734	0.00577639499908576	8.43562183385611	0.00526813827571845	10.7061224489796	0.00563448193894812	8.277159229159	0.00423622602063803	16.3740108288213	0.00567125237993249	8.54941317315727	0.835517378917379	0.468717948717949	60.5548717948718	1272.13025641026	0.78	0.000271821253326941	4189.05794871795	0.000224455672054522	3550.19690740741	0.00013372369955895	1835.37333333333	0.846961855019001	36.0537830446673	66.6071103008204	1490.72379216044	0.8776
105.6128	106.3908	101.3184	6.94467250199749	9.71549666049039	15.5115770133149	-0.492535373773696	-1.57461303049244	-1.49096859655369	3.35176595594708	6.33354448077811	4.96905019801689	4.77368688015834	5.01717895888302	5.57935417688819	52	66	93	0.00672119950020825	6.83591836734696	0.0118801987996574	7.82296550716559	0.00580342681290205	10.1900510204082	0.0117998154924899	8.01002636109757	0.00768279883381924	4.99346938775511	0.0122975901192458	7.64273565504213	0.00561493796576847	10.0104123281966	0.0118225151171743	8.04952877923978	0.830158346068942	0.41110545084055	76.5211411105451	1263.17727967397	0.7852	9.1259126034633E-05	11154.4482934284	7.63578030138283E-05	9211.42424392936	3.54101119448388E-05	4768.26897605706	0.833365327673317	36.3590804597701	82.5852873563218	1422.11356321839	0.87
208.9932	213.2272	214.8544	21.036167753657	12.6562071790881	8.1577203090079	-2.47677013898186	-2.57328078922288	-1.45426882730494	8.70345572965488	10.3037488904921	9.8622500977752	4.60272073998842	4.46060677145836	4.36374223673343	129	100	88	0.0322815493544357	30.2151020408163	0.00453927025133854	6.7172451190778	0.0291147496413533	62.831207482993	0.00405850758145864	6.99007610453728	0.0310930445647646	50.3881632653061	0.00426671670000034	6.91092450441177	0.0278117145760972	83.7551020408162	0.00384842456724729	7.04245275328019	0.789661435150208	1.18424101969873	126.275782155272	999.662804171495	0.6904	2.29918298356302E-05	44360.1257242178	1.85193947013814E-05	34518.3466873682	2.48120180027129E-05	56091.4553881808	0.789637996545716	40.5098934550989	136.000507356672	1148.57889396246	0.7884
211.9216	93.27	75.7864	8.53680581013765	27.9505474007219	32.9657394129117	1.59775219968741	1.53555769047466	1.42635986711237	8.95973874811608	4.72290998774354	4.29012058922642	4.63717635043266	5.97000748284841	6.20831234041784	70	139	155	0.00720666389004585	80.6538775510204	0.00202049278507503	8.51553739349854	0.00513313318524715	191.132227891156	0.00177007131333178	8.94039876551283	0.00615276967930033	124.008571428571	0.00192076417278879	8.78021734892307	0.00568536537514499	172.753436068305	0.00181035376928794	8.85208177858204	0.87006916267163	0.438976377952756	54.4931102362205	1451.24803149606	0.8128	6.30207416738028E-05	17259.5290354331	5.33488953947899E-05	15508.1464409387	3.35913770653369E-05	5696.12352362205	0.879911596192374	34.1302466464734	65.7269580268282	1713.44136737343	0.9244
212.4404	83.766	63.1396	7.98358615159879	21.072922056516	23.2109308697432	-0.647546344545776	3.11530687151265	3.08321107548767	6.81470291667578	12.9662299484699	12.6199552378137	4.68160089379799	5.11072338493959	5.10562107879231	80	139	149	0.0121715951686798	40.2477551020407	0.00359926769982313	7.54671171885242	0.00904968705169119	205.988520408163	0.00236886548691574	7.96779897353839	0.0109414410662225	135.491836734694	0.00296951512341671	7.76827448823362	0.00966364667227869	113.751770095793	0.00315144278529315	7.86874341365727	0.817962541149369	0.593849416755037	89.1060445387063	1175.83669141039	0.7544	6.9723139899502E-05	15073.730116649	5.61909689674141E-05	12653.7512061214	4.44005048597874E-05	7833.74973488865	0.841766554500517	36.1141552511416	103.182648401826	1465.46757990868	0.876
208.32	107.7732	91.4384	12.5897100840329	32.8052947214318	37.9602503342641	-0.642508720383888	1.36341460694157	1.34437710557483	4.28020304959021	3.68019539648527	3.67977980196577	5.49341361532643	6.16448704338977	6.38630994915137	100	150	157	0.0048879633486048	117.097959183673	0.00156633873000389	9.04540850363126	0.00372783041788132	336.030187074829	0.00125197846537454	9.30541666971351	0.00462207413577682	233.509387755102	0.00140542629818698	9.13887273850114	0.00393057800260581	287.496459808413	0.00132442427250205	9.2902614613291	0.909460251899444	0.234511243689766	63.3120697567692	1722.13079394218	0.8716	5.59840224576275E-05	19599.6420376319	5.00979083971833E-05	18188.5982559533	1.56075334117589E-05	3526.14823313447	0.88505064215963	33.7660668380463	68.5792630676949	1753.72150814053	0.9336
171.0416	157.2272	142.622	43.9087038004995	56.4965731718305	59.0574425115074	-0.96215451532696	-0.753907000848246	-0.580530891069364	2.61208412005806	2.07840476287671	1.83704507517812	6.75360409455014	7.01478196589095	7.24976342654502	181	210	222	0.00120449812578092	447.44612244898	0.000332741702529204	10.361419167782	0.00102749433106577	597.559098639459	0.0003217197799003	10.4456108629839	0.00161899208663056	58.9599999999998	0.000355090691541955	10.0412183317421	0.00117072558098709	369.72844648063	0.000337363138713493	10.3407817652671	0.956584660599166	0.0930034129692833	27.3993174061433	2093.05716723549	0.9376	7.36912598050424E-05	27785.8336177474	7.15633802679502E-05	26250.4292157281	4.07526109044355E-06	3399.74530716724	0.927535690430962	31.7018959257765	31.2162162162162	2086.61436062929	0.9916
206.236	126.5984	117.2652	25.572475515679	56.1038493994842	61.6264267093266	-1.06237457860411	0.456114996231932	0.430283896094816	4.15639051682904	1.57809809331522	1.50034702384575	6.3810842853592	6.92373693810832	6.89534310194759	151	195	201	0.00163598500624731	374.66612244898	0.000511770454031319	10.1715251482863	0.00135541036142356	550.741071428573	0.000476432283776334	10.2754460281116	0.00216509787588502	121.812244897959	0.000549406296372118	9.8450584080692	0.00162312627964081	357.354019158683	0.000513380455217418	10.1772377341198	0.929332741529812	0.157567687527741	25.2627607634265	1873.69507323569	0.9012	5.46635296508513E-05	24575.936972925	5.03020513888555E-05	23166.6397807861	1.01081566530073E-05	2839.83089214381	0.904587926043942	32.9497907949791	29.0619246861925	1894.44351464435	0.956
155.1884	119.1616	102.4492	29.5009305860002	37.0436105886022	41.552023047741	-0.328597142211625	0.107554483687499	0.456428786331699	2.86616983849865	2.1366098403401	2.1022404676804	6.81975555665804	7.05687479154866	7.12146676547465	186	163	175	0.000771678467305301	215.637142857142	0.000875615124666137	10.6199078242922	0.000695601369799609	369.547619047617	0.000797293820211466	10.7134859800293	0.000912619741774273	99.8326530612245	0.00093780809286653	10.4219816555261	0.000758222183211554	186.189920866306	0.000890355673697646	10.6218188379731	0.959221280602636	0.073728813559322	22.9042372881356	2120.28559322034	0.944	7.21113632321592E-05	17557.1283898305	6.87650089448678E-05	16938.3297909605	6.49724365368716E-06	1025.68813559322	0.926625372582038	31.8025889967638	26.0064724919094	2076.15857605178	0.9888
121.0256	99.6916	81.14	12.6814882659726	15.0168335357358	14.3776632315547	0.387776580970163	0.564455562093588	0.801580494306196	2.31911708399938	2.06179473878216	2.54572548310691	5.55308742972192	5.60993860937925	5.51141923149981	76	75	74	0.00252661391087051	38.614693877551	0.00462762025086982	9.13785283580763	0.00243532787264562	34.6977040816326	0.00473342089399625	9.16648294755556	0.00373777592669724	6.07469387755103	0.00505400282323287	8.53375300383366	0.00227952361235018	46.9366930445649	0.00453768021941801	9.25936388360923	0.907756100020165	0.165154264972777	54.1206896551724	1730.46460980036	0.8816	9.49222119476879E-05	11060.9664246824	8.58063911160345E-05	10083.2782724592	1.65391996239476E-05	1728.9224137931	0.886369244501671	33.6717948717949	56.7136752136752	1764.34017094017	0.936
142.1572	122.7668	100.4652	23.6521222760242	32.9531609676522	44.4217873228892	0.568373500187782	0.702890899490591	0.865201899260189	2.42145466776334	2.29788549093396	2.16341575596105	6.03732048280237	6.05209709204742	6.17602375163866	121	148	163	0.00361915868388176	134.63306122449	0.000966438648986679	9.03307674910656	0.00314069080012953	160.015731292517	0.00093974956590134	9.12395042937834	0.00540441482715536	5.50448979591838	0.00102900570172623	8.39402578747913	0.00334009794960831	118.765930862141	0.000974361337754701	9.11552438687456	0.902351335037974	0.28178854215184	46.3292966930601	1666.97484862599	0.8588	7.37290432155744E-05	16737.2249650675	6.71286560256786E-05	15024.7018069642	1.92097920128597E-05	4861.83837913367	0.879400108740608	34.113321799308	52.318339100346	1711.4169550173	0.9248
137.3308	111.398	78.6324	11.7307702799092	11.134073648041	13.3707019352015	-0.764049650228772	-1.13144120645572	-0.743162260556052	4.04480312226743	4.73848568928395	2.72799360259898	5.4474392413198	5.3296986033948	5.4977676000679	67	78	90	0.0046530612244898	8.29795918367347	0.00831995007775352	8.26300918469568	0.00374084582812716	20.3724489795918	0.0081052057279162	8.59364107025181	0.00519350270720534	7.56448979591839	0.00834824638339929	8.16923538476873	0.00429416384017419	6.74135776759684	0.00858828204763587	8.33750154190837	0.863275745257452	0.32	61.809756097561	1436.39707317073	0.82	7.65294426291662E-05	13379.8565853659	6.62686890121108E-05	11511.2070020325	2.38018340013771E-05	4384.83853658537	0.873639937858905	34.1507798960139	68.182842287695	1680.10311958406	0.9232
195.2348	172.0168	135.0772	11.5655206955848	13.8964642179225	14.9362123766369	-0.0356652325873773	0.476793498395146	0.818102327377813	1.98763641485139	2.45301780315003	3.13281179456743	5.43702961476132	5.7236251579731	5.76896581213059	61	66	73	0.00269754269054562	9.32326530612244	0.00582205986739066	8.87004791452764	0.00256620505344994	10.8988095238095	0.00614393089657532	8.94287459552623	0.00313202832153271	7.05387755102042	0.00576823792260718	8.68876187562285	0.00203736434267201	19.3423573511037	0.00571312607642006	9.24802866299617	0.896805295950155	0.257943925233645	47.5280373831776	1636.92336448598	0.856	3.29123404703082E-05	30685.1373831776	2.95082447457837E-05	27511.1233119159	8.45380467942219E-06	7968.30794392523	0.871474757087705	34.4144851657941	50.5130890052356	1660.08115183246	0.9168
125.5988	182.544	181.9596	8.36288458368283	11.3133224120945	11.2425071865665	1.3294764834933	-0.00255988643487059	-0.000666991627160259	6.57428699410646	2.69386441225896	2.97123464545567	4.93070117465162	5.46441430054461	5.46939579317533	65	65	69	0.00712869637650979	3.50122448979592	0.0121279397873305	7.67602835591443	0.00605505807765286	5.34523809523809	0.0119315868933141	7.88533156268777	0.00744556434818826	2.86489795918367	0.012367688119802	7.55860775860731	0.00507545707128488	6.60433152852978	0.0119700040371144	8.1115806192056	0.794561934517539	0.76216814159292	59.033185840708	1060.21681415929	0.7232	3.62753429782445E-05	27572.7693584071	2.86962500052431E-05	22018.6556414393	2.77960775270963E-05	20795.1565265487	0.821084114343324	37.6958174904943	68.1406844106464	1333.96958174905	0.8416
158.8324	209.5312	211.6616	20.0878348818383	8.77980788855884	10.2216576659561	-0.804589581601303	-0.532387994607929	-0.491569667306801	2.40556857710044	2.47338617986002	2.10898397841497	5.9037193543585	4.99187823524031	5.14779948593841	84	48	49	0.00517117867555186	8.7873469387755	0.00685740345165998	8.34719601311633	0.00357273011245314	18.8401360544217	0.00669371305688089	8.77001480689065	0.00407663473552687	13.274693877551	0.00679579758222984	8.61472214398505	0.00341121922508687	23.0299875052061	0.00657374091933248	8.86464717808193	0.871038570490422	0.611503531786075	55.5963673057518	1424.66801210898	0.7928	2.66018760619671E-05	37767.3269424823	2.326060294359E-05	32756.1120607806	1.5771207359491E-05	23867.0479313824	0.87757431380086	34.3548106225512	64.4009577710057	1693.8315193731	0.9188
165.1964	165.7016	168.7636	8.08229095244659	8.98860152860277	8.55264374564965	0.491260730182792	0.106138586712123	-0.0429158517883333	4.80611165512192	3.77999391103498	3.50513818364404	4.95433640701924	5.1564138512029	5.09690607971522	66	68	65	0.00471303623490213	10.1832653061224	0.0128245211073936	8.29254637107175	0.0030369290573372	26.7882653061224	0.0112283319791896	8.81936367719829	0.00399766763848398	15.1538775510204	0.0121788527963622	8.50877942642795	0.00329395585381004	21.1120366513952	0.0118101405694438	8.72379192671561	0.880916344684572	0.463937621832359	71.3099415204678	1508.53703703704	0.8208	3.61659030776948E-05	27635.1028265107	3.18560853157818E-05	24359.6255347673	1.69593311437813E-05	12613.5248538012	0.884770855978585	33.6840530141086	80.4784095767422	1754.92218896965	0.9356
223.6296	196.4724	171.828	35.5098015178908	54.8102585128003	71.6098430105806	-0.720883302724792	-0.640913198626487	-0.694966006305713	1.95382666944812	1.66477444823135	1.70309110000649	5.58999219758733	6.12884731089344	6.37444109620637	127	171	200	0.00786838817159517	40.0077551020408	0.00038964922983965	8.51757406140704	0.00660242838632053	58.4149659863943	0.000384493154949007	8.7721099487332	0.0116698042482299	7.9122448979592	0.000385579678141273	8.13107419709938	0.00734301149337159	37.0004164931279	0.000387664896566933	8.61143832265146	0.875787133463747	0.741902834008097	40.0425101214575	1438.68218623482	0.7904	3.41394260408673E-05	40220.4868421053	3.13095781642822E-05	33667.1490679187	1.3717671687858E-05	42535.3081983806	0.831174978660259	37.9461134954697	44.8426323319027	1369.11826418693	0.8388
177.1928	155.3708	123.2324	17.566912880754	19.8986358165579	29.317202974363	-0.471707084608538	-0.750464970934004	0.0947851240996521	3.45340471783209	2.80056690239196	1.73223986800765	6.05838010336521	6.13092594078299	6.53550856362355	97	101	124	0.00221074552269888	19.793469387755	0.00285673072575671	9.38563325097132	0.00142518742190755	60.1845238095233	0.00268920766230585	9.88420273788739	0.00161166180758017	49.1763265306121	0.00274857816657776	9.79064305334394	0.00141843577948311	72.7863390254057	0.00263983992760279	9.93297163695141	0.912126445565235	0.243466299862448	39.1531407611188	1736.54516276937	0.8724	4.19116285884773E-05	25057.663915635	3.85323326504386E-05	22674.9559982679	8.84057610634068E-06	6857.91701054562	0.90587534758899	32.6464730290456	44.6	1912.80331950207	0.964
185.0272	163.354	126.606	19.6011443584297	15.1557211639697	21.4352691608946	-0.440586356898977	-0.520894824772375	0.748070479246042	2.52779294225165	5.29298310110835	3.20821328053859	6.04567834209162	5.66106460800276	6.11921356828674	115	123	140	0.00320000000000002	23.9318367346939	0.00442211249526583	8.95044917908694	0.00261248206765697	43.9153911564624	0.00419117134824344	9.17481747305117	0.00401932528113287	17.0542857142857	0.00441066458890738	8.65691161974343	0.0026698232948544	34.6709704289879	0.00434836525275739	9.16360236837106	0.908567869681949	0.297397769516729	54.6514869888476	1700.67472118959	0.8608	3.71632974672427E-05	27609.9107806691	3.38818331118059E-05	25048.1704033715	1.07758448922554E-05	8238.81830855019	0.88993689747844	33.627133105802	59.4249146757679	1785.42491467577	0.9376
216.766	200.3132	183.2168	44.755424743823	53.0762009356359	56.3170897486722	-1.41901551657207	-1.43087462624777	-1.48495928899192	3.74802742957228	3.53907871823369	3.72042225217662	6.32366499210535	6.32784160837027	6.35889496924259	179	197	215	0.00331595168679717	192.203265306122	0.00036848634023627	9.22673908606506	0.00273865923920589	249.479166666667	0.000359697731435182	9.39382713654033	0.00583190337359434	11.8469387755102	0.000384718044124827	8.62519282603503	0.00310002027823683	160.728029987505	0.000369248055213858	9.26310981779133	0.915376248079877	0.293087557603687	39.3640552995392	1746.1797235023	0.868	3.81524181144335E-05	42280.3216589862	3.65535764277926E-05	37702.8429003136	5.32153022197708E-06	16241.5566820276	0.880917243505591	34.0004312203536	43.8081069426477	1723.27253126348	0.9276
196.7924	184.0576	173.1788	15.0895096752678	17.416150040695	17.0308552503977	-0.126377133571273	-0.12390207492467	-0.16193225204013	2.32801487933233	2.36178424512056	2.44466103304515	5.90499774547961	6.0987026280933	6.08216321749691	82	99	97	0.000867971678467317	106.288979591837	0.00293774129457827	10.3672832064374	0.000802616965153396	177.320578231293	0.0024743836563754	10.4802202972601	0.000869970845481062	99.2571428571427	0.00299407280164079	10.3662904706012	0.000755793651853742	199.130362349022	0.00232584367762139	10.5384053192735	0.972037575589715	0.0419609472372248	40.3120066472788	2235.29912754466	0.9628	2.90983326160511E-05	35100.1528874117	2.82754418251282E-05	34122.5104209943	1.2304536967696E-06	1470.36684669713	0.939176096740558	31.1786423183803	42.6181024215959	2187.19610956729	1.0076
149.2448	131.0844	129.3568	10.4058864571934	19.2332128527711	23.5193174594842	1.55170295505416	1.630403327097	1.43382781036638	5.33747721301476	5.54297853895918	5.37509202688077	4.98899642134951	5.79795500272625	6.21641262282108	64	99	124	0.00629404414827156	4.03224489795918	0.00370642722485285	8.02489773808386	0.00463963221342968	9.20323129251698	0.00407467788948106	8.42085341247563	0.00572694710537277	10.8024489795918	0.00380430934671271	8.23935400065206	0.00516219033406365	19.3090379008746	0.00381408330347763	8.39695175966756	0.833673343206265	1.01628664495114	47.3821932681868	1200.49728555917	0.7368	5.43482125620591E-05	19137.3235613464	4.49687858369E-05	16114.1261156044	5.79922743733819E-05	18026.6818675353	0.849181225509437	35.8702359346642	59.3720508166969	1507.08529945554	0.8816
164.0988	161.3868	167.0844	12.6643214804426	12.2441000387942	14.2028052384027	0.043006449253099	0.268044671803904	0.390427547549318	1.92784474493336	2.66140653914095	3.09349429896051	5.55693282853365	5.56988875177374	5.73360203058609	55	65	74	0.00391003748438152	4.78163265306123	0.00718139225817111	8.38167102871377	0.00301595978527463	10.0289115646258	0.00707027504647515	8.77839794070375	0.0038320699708455	5.91795918367348	0.0071534485732841	8.47399017761998	0.00292585988657718	10.5285297792587	0.00704854372656517	8.81733210227779	0.870130597014925	0.47363184079602	49.3621890547264	1439.36019900498	0.804	3.78723184281608E-05	26623.4875621891	3.29532434455196E-05	23159.2131821448	1.76907438885417E-05	12762.3402985075	0.856370310578034	35.0773333333333	55.1866666666667	1564.37511111111	0.9
182.1576	168.2348	164.034	10.8843723861323	19.6881199955709	24.8008879679741	0.00712393395091616	-1.29111472503287	-0.706323488839231	3.58099421711996	4.64147992208991	3.02157769903071	5.36303606296933	5.97089005949852	6.38893198495068	68	103	113	0.00451745106205748	7.62122448979594	0.0048914122912774	8.5043021501532	0.00408033111203666	6.89668367346939	0.00514809619163758	8.54666792700131	0.0044234902124115	8.19265306122449	0.00490237623242674	8.52058792161656	0.00311424453333255	22.9758433985839	0.00481069970534229	9.00731795392401	0.861848182775534	0.631901840490798	46.0858895705521	1372.91615541922	0.7824	3.45670630571676E-05	29463.4626789366	2.99343205709352E-05	25259.8565036578	2.03838684369128E-05	19867.1017382413	0.826370254718831	37.3408662900188	51.2853107344633	1364.78719397363	0.8496
191.6608	147.2632	141.48	10.7337292382471	27.3431440357542	29.7557254994732	-0.298613787367562	-0.308644437220125	-0.250287618972242	3.36623329454853	1.71946744564535	1.78575047591514	5.40195914396057	6.25113676627577	6.34413065608596	75	105	109	0.00240199916701374	37.089387755102	0.00258712730375746	9.37239219833094	0.00203221169420152	54.2053571428568	0.00256751792936887	9.55080811915193	0.00319866722199086	13.8885714285714	0.00266121261314909	8.94646731383319	0.00204673153505209	45.7963348604748	0.0025664515465364	9.49252697425821	0.897921744752355	0.343720491029273	39.0113314447592	1627.39093484419	0.8472	3.96973709290247E-05	26309.5406043437	3.52840016441128E-05	23818.089247536	1.60029746842764E-05	7777.6940509915	0.877683364065829	34.1215923842492	43.1903937689312	1701.9536996971	0.9244
153.5164	157.5888	158.7272	9.76570176894625	10.3727968533082	10.7020362623194	0.02120841789917	-0.00190436455189351	0.124526138428684	2.94543583664841	2.88358042080082	2.85933478120263	5.31766761646716	5.4023596114344	5.44033010476838	64	66	69	0.0025369429404415	16.2828571428571	0.00894062643597173	8.98209682136597	0.00192844995140916	32.5607993197278	0.00827745028956235	9.34327544680873	0.00231336942940443	21.3542857142857	0.00871173080812771	9.14716573833478	0.0017965928051983	38.0304039983341	0.00792759863921238	9.43747912055887	0.926234816806053	0.188172043010753	61.6120071684588	1843.29480286738	0.8928	4.07876419932775E-05	24625.5304659498	3.77461164899456E-05	22832.8683705446	7.68081830021874E-06	4608.16577060932	0.907705573469814	32.5907207953604	65.6743993371997	1926.20215410108	0.9656
152.3676	99.8512	94.4432	12.4957780966213	23.7611501943824	24.8657590626146	2.15996937086772	2.50683300584973	2.45011494660218	8.8901495348518	8.35390579642856	8.1191070859948	5.18753083954654	5.25890355283438	5.42791643559596	85	119	124	0.00953102873802587	22.1097959183674	0.00239640171235176	7.71011473886461	0.00705579850988025	29.6615646258503	0.00234062033652313	8.00883763945396	0.00949804248229909	13.8032653061224	0.00246473647831837	7.61419538380019	0.00723164598396381	39.9192003331946	0.00234681806060639	8.00481629920091	0.843690626803685	0.620528771384137	82.3716951788492	1287.43856920684	0.7716	7.7056757671087E-05	14120.8983929497	6.38338358072875E-05	12259.8181140089	5.28613042425311E-05	7321.44738206325	0.845003991954461	36.0633834929321	94.9361605107159	1481.57637938896	0.8772
151.2724	101.5764	96.7204	9.58568715533738	15.9664449092464	17.637069593331	1.9002649283377	2.31571015736689	2.24826425191369	10.8860515125111	10.9714575691519	10.2276322396227	5.01609521027401	5.57374170477605	5.68176103584298	93	119	126	0.00543673469387757	11.9551020408163	0.00499581467442115	8.15607199734123	0.00379435362580402	23.828656462585	0.00475082711383885	8.61726154281289	0.00452244897959186	14.6889795918367	0.00499392138301701	8.39700135954455	0.00351946233703469	27.7571845064556	0.00477354506440828	8.71223802028276	0.843254365609172	0.609553478712357	55.4922118380062	1284.49013499481	0.7704	7.44722170617252E-05	13922.5970924195	6.20537390159182E-05	11934.176913695	4.89111066634095E-05	7596.64070612669	0.856733093739986	35.4249215598386	63.9251456745854	1554.99910354101	0.8924
151.4136	112.8304	104.8392	8.60107755109789	24.9554810781119	25.1190076109706	0.416704567067636	0.229744322447503	0.269767445620891	2.44970447803439	1.42980351764962	1.63358840231501	5.03556468774621	5.89088500316656	6.06429202937415	50	110	117	0.00597484381507706	7.38857142857144	0.00366272773163616	8.20576459171382	0.00429761615530567	10.8142006802721	0.00362962770906577	8.60804150850765	0.00578592253227822	6.84693877551021	0.0036454577889325	8.29130895013369	0.00442703919875121	16.0453977509371	0.00362701380875576	8.6150234770342	0.84513092717311	0.580462724935733	50.7583547557841	1302.40154241645	0.778	6.68433079597033E-05	15776.9372750643	5.59134774241658E-05	13472.3081194086	4.29846431649864E-05	8134.60257069409	0.842302489753599	36.0464904284412	59.7556973564266	1469.92798541477	0.8776
147.3572	114.476	112.5324	10.8371955855747	26.9064717865424	29.8428576084798	1.01034828511368	0.941989817114314	0.87972139722117	4.81264517054663	2.59065271917162	2.44625255454386	5.34647813589848	6.1590020613561	6.33255027201634	77	115	121	0.00442215743440234	20.2016326530612	0.0021266635280754	8.90126406480283	0.00337026817529723	45.0633503401358	0.00207771046267568	9.22309090576208	0.00374044148271561	29.6608163265306	0.00210476185950214	9.05966821718786	0.00296749185271093	51.0962099125365	0.00204527702839826	9.32890109236129	0.894759509312297	0.425562470081379	44.4437529918621	1594.13930110101	0.8356	6.70549684110608E-05	16353.5768310196	5.89930944064727E-05	14920.7980218172	3.35254319810332E-05	5469.41455241742	0.868416227476606	34.8403176003529	50.7441552712836	1630.68416409352	0.9068
140.9472	121.176	121.8164	12.8688621159759	28.105021330716	31.2111949633461	0.727487346278404	0.540070353329049	0.578806923648462	3.18749768133969	1.80417040264284	1.89628064606254	5.5770368537207	6.28049257261164	6.42836853060084	79	105	119	0.00308104956268228	16.9579591836734	0.00178397473793219	9.14701211906445	0.00255572041741857	39.0803571428569	0.00173251354861047	9.41310618328075	0.00286014160766355	31.0995918367347	0.0017888250472398	9.30611862563451	0.00214872985207985	53.9708454810498	0.00173148982935637	9.62036232872853	0.897128829148902	0.354808147797253	39.8460445286594	1618.97820937944	0.8444	6.55605946935359E-05	16962.2662245381	5.8224594078024E-05	15350.2837428286	2.63632870213984E-05	5213.54239696826	0.886791769562363	33.7342747111682	44.2785622593068	1763.8189987163	0.9348
144.8012	71.2352	56.5896	7.15357802501657	3.49237468780198	3.8642427252956	-0.512183053282787	0.433272597570842	0.0251265355756692	2.78605955915517	3.48929036161167	2.88208197711284	4.80339723027727	3.81670884711431	3.97422145149126	40	24	25	0.0263043731778425	0.87469387755102	0.0693726969234549	5.76500981512729	0.017949696885557	2.13095238095238	0.0674142446685658	6.31891049560675	0.0199406913785922	1.79020408163265	0.0664416743851653	6.20387788834374	0.0164704731351524	2.61307788421491	0.0647579205143465	6.43990562925982	0.646394176384514	2.64079822616408	105.761271249076	532.526977087953	0.5412	0.00011726686493097	8404.04656319291	7.58601301632244E-05	5430.40168158739	0.000310787505924997	22088.8263118995	0.742745208470395	42.2292218104817	135.789835892006	966.600847008999	0.7556
147.0348	71.6968	57.5884	5.88278751613553	3.48839071206194	3.75635267779797	-0.270323268070533	0.337261578204357	0.372308175785098	3.28760034356301	2.7423911189874	2.58032749839156	4.56647621149731	3.81098267722857	3.88086588701556	40	21	21	0.0267135360266555	0.835102040816326	0.0775401180081568	5.69864994872974	0.0174478805127493	2.01488095238095	0.0739325576161871	6.27252718802241	0.0210322365680966	1.40571428571429	0.0763805141180053	6.0276375950435	0.0171587883085643	1.92336526447314	0.0744800445396201	6.24978911344314	0.659418960843822	2.73469387755102	109.173469387755	558.782798833819	0.5488	0.000114416992688126	8603.3666180758	7.5436709930951E-05	5673.9904242233	0.000314223738975433	23420.7004373178	0.737416772750219	42.5848452508004	139.82924226254	944.933831376734	0.7496
146.3184	78.4756	64.2672	4.30695036423686	3.0320627697988	3.55356217899729	-0.102184822227414	0.100379327726588	0.117380040235685	2.73717637209256	2.74336900184552	2.65432827105634	4.13857891307024	3.62196856687384	3.85345668623515	25	16	20	0.0368499791753436	0.695510204081633	0.127598658644483	5.21685078216567	0.0249404183442085	1.52168367346939	0.122521701295917	5.71707058734381	0.0289312786339025	1.14326530612245	0.125331353719762	5.51738883352955	0.0244981570048992	1.59558517284465	0.121670443835563	5.74922833002685	0.587863558080507	2.99362041467305	124.725677830941	423.180223285486	0.5016	0.00010386926385179	9463.49202551834	6.09797443988463E-05	5571.2781022439	0.000313376437824899	28091.2599681021	0.718360055729249	45.0482603815937	165.96632996633	851.438832772166	0.7128
147.0356	117.8956	103.8904	12.3455227771043	27.2306867456552	25.4134765004712	-0.0212480514365959	-0.43327354642379	-0.503296150372689	2.55040606133564	1.70981376005829	1.83676251158306	5.61165264396867	6.21678108094655	6.18122390495498	62	92	97	0.00249562682215743	10.5481632653061	0.00216483448361146	9.08442970897303	0.00179721123143135	18.3116496598638	0.00215456050312563	9.46446413214017	0.00214643898375677	11.3902040816326	0.00220239802117961	9.23714825575372	0.00167932943392149	24.8371511870054	0.00215261616738864	9.59852126875525	0.886587287847761	0.424139602520601	32.3969946679593	1541.43238002908	0.8252	6.87395181709349E-05	16090.5758603975	6.06759740782367E-05	14255.7207737477	3.09219727956867E-05	6687.90450799806	0.881856521429164	34.1397663349199	37.465599307659	1723.62137602769	0.9244
136.5032	84.7932	70.282	11.804930739314	12.9835601342621	14.0555211927555	-0.341299599511466	0.734803406167482	0.739187930563941	1.84064570649073	2.2984609050677	2.24413471810198	5.27603169682877	5.347846762419	5.40544418132482	54	53	55	0.0101907538525614	2.23632653061224	0.0174574085361536	7.24838763410463	0.00736816835577772	5.32440476190476	0.017417601313007	7.74615733152358	0.00933344439816745	4.1334693877551	0.016967477553615	7.52875573146429	0.00672720532764271	6.38192419825073	0.0168198139614236	7.86679465480492	0.769768617612885	1.14749262536873	67.4778761061947	930.853687315634	0.678	0.000102230467303241	9810.56637168142	7.85093595876936E-05	7573.89825156247	0.000118111678478362	11154.2530973451	0.817267715536773	37.7994282991901	80.1348261076703	1315.84040019057	0.8396
124.2852	129.8832	131.1088	9.59144728182353	9.88890073567331	10.0130396264072	0.0462080352069554	-0.153262736713514	-0.112275484021955	4.32816418853991	4.29622608482035	4.13907905344239	5.18914951749218	5.25426484922057	5.27648703134757	74	76	78	0.00596418159100375	8.34163265306124	0.00991046211773594	8.14598676636334	0.00408358496459813	20.7848639455782	0.00922803873569216	8.6391127815456	0.00555635152019993	11.0187755102041	0.0099094789658558	8.26658608443972	0.00445375304368706	16.6214077467722	0.0095051035271492	8.53958424096707	0.846753409045231	0.680917622523462	60.4264859228363	1291.77580813347	0.7672	6.08292382566169E-05	16616.712721585	5.14970813549715E-05	14096.994263609	4.16676217848437E-05	11088.3055265902	0.84734500303524	35.8179347826087	69.5045289855073	1499.49184782609	0.8832
109.0332	114.4084	117.246	8.1511776915977	9.74129403313543	11.3848620545003	-0.0916854487020162	-0.0348454430593576	-0.061219955963675	2.20090721712594	1.89335264013016	1.89544718623666	4.97375273567316	5.16196221901344	5.38735329777175	38	43	52	0.00539941690962099	4.27428571428572	0.0110265205278773	7.90620546215874	0.00493067124809107	5.4234693877551	0.0110805966846166	8.03155192643105	0.00859608496459808	1.45877551020408	0.0114383433874944	7.21051495095362	0.00477674771427496	5.33069554352353	0.0110957474701686	8.06841209244304	0.854654957245338	0.59918200408998	59.8231083844581	1344.06952965235	0.7824	7.93116206769362E-05	12732.3098159509	6.8332028413777E-05	10791.5651848142	4.42542202922807E-05	8163.6927402863	0.82856092094983	37.0289855072464	64.067788686302	1382.44086021505	0.8556
137.848	143.4828	146.2928	7.85066213767985	7.62748347490835	8.25725548593478	0.65221331895841	0.475626957396036	0.538611102909405	3.6433180011369	3.48450494473942	3.62250075806401	4.9422683228361	4.91170779221537	5.02013180193456	49	51	56	0.00610978758850479	8.37224489795918	0.0154946495983123	7.96691333432695	0.00477195555092791	13.7780612244898	0.0147001931289164	8.29172068675409	0.00585189504373178	11.3044897959183	0.0152961490034918	8.05129520817977	0.00417932900025521	23.1811745106205	0.0134973143868656	8.47834907641535	0.846706667063259	0.580246913580247	73.5380658436214	1307.58847736626	0.7776	4.91085342191596E-05	20324.5118312757	4.14963531463823E-05	17251.129989779	2.8893759172632E-05	11576.383744856	0.837608667336029	36.0593065693431	81.2928832116788	1449.32846715328	0.8768
161.8424	137.2196	138.5052	13.9073492168709	46.4297423624125	52.5094312762955	0.580104390839755	-0.878707881314717	-0.881694647978687	3.73848900659076	2.12670656740188	2.11069105707508	5.74536346701732	6.45048627275866	6.55114597482801	112	162	175	0.0021597667638484	56.477551020408	0.000850267553117094	9.41652739526697	0.00170104181128235	109.553996598639	0.000844678127806262	9.67859445969827	0.00211478550603915	83.2420408163264	0.000823932074074513	9.4484122814406	0.00167967636697259	150.433985839233	0.000806831514320653	9.74151931281857	0.883321569885573	0.36381135707411	30.6833493743985	1536.22040423484	0.8312	5.80381378489804E-05	22284.6347449471	5.06779975327848E-05	19771.7719703775	2.47319571696687E-05	7437.93743984601	0.878445084209762	34.1672443674177	35.7538994800693	1704.99220103986	0.9232
168.046	172.0208	181.1948	13.5312927689855	25.1385195936435	27.2949089201631	0.262457303231966	-2.83302127570418	-3.0665359056795	3.155925194838	12.057344830775	13.1849145905446	5.73936933812172	5.82728186335759	5.82623218064816	90	152	162	0.00269654310703875	44.1167346938775	0.00226685794347805	9.07598459125931	0.00211066569484936	74.6730442176865	0.0021521174892554	9.35202940549478	0.00268854643898377	43.5122448979591	0.00227781927213253	9.05269497262874	0.00209877149271934	88.4689712619736	0.00213121331604535	9.37370366486453	0.881341437406696	0.331094049904031	44.0623800383877	1531.74184261036	0.8336	3.63110585290216E-05	29779.4894433781	3.2259112452474E-05	26127.3429181329	1.13826186446318E-05	10226.386756238	0.885069089877634	33.6988879384089	49.8537211291702	1756.28400342173	0.9352
116.402	101.8128	93.5384000000001	16.6089974411462	25.1983046286848	32.1771677659797	0.0143308339951976	-0.469794643733246	-0.302883938911506	2.07263810030963	2.74121528764398	1.98314167832506	5.95643204562699	6.46381428341696	6.7618042472167	86	131	142	0.00251995002082466	22.6036734693877	0.00231127175749858	9.22379169843604	0.00186373443935401	50.9800170068023	0.00226332145696033	9.62083027868862	0.00220741357767596	37.7302040816326	0.00226424564124745	9.41509358267164	0.00183128611030977	60.683465222824	0.00222310850897903	9.66768447396012	0.85523825447782	0.5658835546476	29.8580183861083	1348.55464759959	0.7832	0.000101128520889461	11462.1961184883	8.63849541467125E-05	9801.29805462907	5.40400622025723E-05	6712.83605720123	0.886293193279471	33.6569841947885	36.2857753096967	1764.23793250748	0.9364
147.7716	147.3448	135.5344	12.8405386740588	15.1592979045865	18.6596467447806	0.0229417448164839	-0.0150393530093723	0.0529695867557027	2.29082904435396	2.12806767779215	1.93770271704587	5.63879327377664	5.83018546268081	6.119435327351	57	65	79	0.00373977509371097	3.96571428571428	0.00461812639446118	8.45445376870862	0.00272853614234808	9.53528911564622	0.00474097827378759	8.8722423075501	0.00317334443981675	6.93061224489798	0.00475959096035057	8.67528788096837	0.00264970117788975	10.5918367346939	0.00471672306990203	8.9356386836556	0.818550161735815	0.686798503474078	36.2047033671833	1168.60555852485	0.7484	4.77890607317037E-05	21487.073757349	3.91893575332998E-05	17548.3196469626	3.17920949085985E-05	15209.0507749866	0.850363523641346	35.5242805755396	44.0008992805755	1522.22482014388	0.8896
177.99	132.2216	115.5716	17.7179090188431	23.188300788113	24.0425471495846	-0.835545415263216	0.209579908350487	0.51749597146155	3.86147256164013	2.7610661660619	2.91809450945541	6.04746377605687	6.46597797843593	6.46204144674187	105	121	121	0.00218875468554771	13.3575510204081	0.00288065580354734	9.30781701731366	0.00170971875144619	25.9655612244897	0.00288123831369984	9.63077391693403	0.00236068304872972	15.1179591836734	0.00287003594892975	9.259345085409	0.0018434287670988	28.3448563098708	0.00284141240788537	9.55516414014939	0.893252118644067	0.284369114877589	36.3512241054614	1610.09416195857	0.8496	5.00911983430769E-05	21096.3276836158	4.48215800585418E-05	18844.5506996757	1.41246115703669E-05	5928.97128060264	0.886616481285798	33.6100682593857	40.7380546075085	1767.58447098976	0.9376
145.998	134.8088	136.5516	7.81600895598258	27.4618907317031	30.8108185129834	0.147569210224843	-0.735580974628897	-0.726698958840076	4.12236637068666	1.86561824080573	1.8900256150329	4.91461371080184	5.7978931076768	6.0409715394677	60	89	104	0.00483065389421075	7.93591836734695	0.00256985785140591	8.39410174601214	0.00384135371835808	14.3299319727891	0.00253362537491511	8.69303063159832	0.00488596418159101	9.01877551020407	0.00256201091250706	8.37198942498936	0.00358988974641102	18.0583090379009	0.00255574877989913	8.78626704359468	0.84408345028341	0.591308846352819	43.5597516813244	1292.28815312985	0.7732	5.56826737915718E-05	19327.1733057424	4.71491235603523E-05	16215.3786716798	3.06916420796822E-05	12263.9751681324	0.826143336082384	37.2226397369657	51.0272428370127	1367.1418506341	0.8516
164.9476	161.6096	157.3232	17.0112684488841	23.1357988372997	26.652360904055	0.316249270956568	0.211518652527426	0.115265636057136	2.77109243022503	2.49085157748948	2.32166418933582	5.92588355648621	6.30660627753473	6.48350384859493	87	120	138	0.00266355685131198	15.7057142857142	0.00212542709964576	9.16958111367254	0.00186988060530337	41.330782312925	0.00205346492090231	9.56649373143764	0.00206180758017495	34.1583673469387	0.00206035925418062	9.50068471291087	0.00178098081789813	54.4423157017911	0.00202795497785758	9.63789643697855	0.885646184738955	0.378313253012048	32.8139759036145	1545.01542168675	0.83	3.96230396811052E-05	26774.5513253012	3.50770730561445E-05	23746.4619070951	1.49347300062186E-05	10080.0640963855	0.882321078901622	34.0881590319793	38.732929991357	1728.02765773552	0.9256
164.1456	165.0672	164.3976	20.0157238350253	22.6513108706759	23.8602161398425	-1.51346311639083	-1.58283655176954	-1.71192051609885	4.64974640442862	5.01668892506745	5.68470953517566	5.78621475506625	5.96281582655316	6.03972760051501	105	122	138	0.00284581424406498	16.4122448979592	0.00212515650964358	9.11280926886629	0.00225021981581747	55.3295068027208	0.00221309395002076	9.45162571190771	0.00234335693461059	45.1844897959183	0.00197633254661989	9.41688401268529	0.00186702021457462	62.2486463973348	0.0020135943596456	9.62238737718408	0.908179556586749	0.283526682134571	48.5638051044084	1700.75127610209	0.862	3.97967123212012E-05	27328.1526682135	3.63889376431201E-05	24645.906682908	1.02139397865231E-05	8418.12668213457	0.903493613856668	32.8514190317195	55.6636060100167	1891.31051752922	0.9584
151.7824	151.5768	148.6216	15.3458740461402	18.1956945940516	20.4938237876683	-0.955817231374638	-1.13691753111457	-1.21872083588192	3.37590496701393	4.08543380089411	4.30285345658528	5.69625045200278	5.92403037961535	6.0601833472514	80	100	107	0.00394069137859227	5.62204081632654	0.00316959616514634	8.65513901627741	0.0026981668517747	13.5408163265306	0.00322304726365138	9.0909219235598	0.00329229487713455	9.75877551020406	0.00334402816726549	8.81357901451049	0.00275308722712198	15.4618908788005	0.00326346776570376	9.12032990237216	0.858803160980683	0.72004132231405	41.3811983471074	1347.24070247934	0.7744	4.55261631035564E-05	23163.1503099174	3.91737078206245E-05	19873.6339182578	3.17816920365607E-05	16810.5650826446	0.876374235982302	34.2522796352584	49.440295267043	1690.64046895354	0.9212
156.9076	108.4112	105.0212	13.6472364323331	20.9081542600011	23.8222238793946	0.078629082180156	0.28609957742157	0.181043266734899	2.31983549708504	2.08487140872672	2.01207391361736	5.73913257871512	6.2705445770515	6.47118627931857	71	85	98	0.00189654310703872	17.7387755102041	0.00434245269309037	9.38300395260703	0.00135721805729097	44.9617346938773	0.00407978047872806	9.81352410924926	0.00197117867555183	22.4306122448979	0.00431410202855329	9.3900145908954	0.00157455565248478	32.9325281132861	0.00419234650460847	9.6317751908333	0.916391576856911	0.226775956284153	41.3251366120219	1768.56830601093	0.8784	6.80072973133423E-05	15310.473132969	6.2093177198851E-05	14073.7292502783	1.6504871949276E-05	3240.5737704918	0.908328092963048	32.6408129406885	46.2683533803401	1927.97386976358	0.9644
185.5028	125.93	122.488	11.3349544401378	21.0873492881396	25.2940517908855	-0.612588551838684	0.33286364161913	0.231079128247445	2.42113845831265	1.98173936264337	1.93419790373833	5.33235164182801	6.22016549552146	6.49603193728836	59	83	99	0.00320999583506874	7.15591836734695	0.00584575475213061	8.62531223426919	0.00231782764126058	17.0705782312925	0.00572307240701555	9.10316404503418	0.00248363182007498	13.3016326530612	0.00564201555535867	9.00271564818925	0.00197491639347133	22.1041232819658	0.00557607344120791	9.28998874400825	0.882837769866611	0.412050534499514	46.7755102040816	1522.49271137026	0.8232	4.90238170042323E-05	20735.6088435374	4.32406845293115E-05	18296.9136456288	2.09042514529588E-05	8338.34256559767	0.862938679317554	34.950420540062	51.3674192120407	1599.90305444887	0.9036
109.626	78.4792	76.5624	14.921277559244	12.8335485100575	14.7338693573684	-0.0583183391768042	0.200346448411713	0.121351831665346	1.91173296092048	2.35360008444736	2.20769252845613	5.76150643180541	5.64749880771979	5.83317604811787	67	63	71	0.00537975843398584	4.92489795918368	0.0138616562500659	7.99543093517891	0.00373686889721873	12.8371598639455	0.0132393304847078	8.52571427334621	0.00455743440233237	7.99510204081633	0.0131945488516532	8.26693920065678	0.00410369759511214	10.8163265306123	0.0131941549773836	8.4322542227389	0.861176017972069	0.554095045500506	69.7674418604651	1382.71789686552	0.7912	0.000131110186691458	7723.74772497472	0.000112949219289189	6645.13524031638	7.17144601654553E-05	4350.61526794742	0.865018352688426	34.8886433937251	75.1246133451171	1612.18338488732	0.9052
130.6312	65.1356	57.9232	16.5397214777033	12.2325963163999	15.1795817386383	-0.620698417529239	0.446167805280949	0.35806518923088	2.41639701477169	2.40313634435505	2.25352560514674	5.82009347360574	5.48609602627581	5.79580427470897	68	68	82	0.00503923365264474	7.35591836734695	0.0111249614451011	8.1253598468048	0.00450260886667594	8.91836734693877	0.0108686373029714	8.27016498833566	0.00790603915035403	2.72244897959184	0.0109436922329848	7.55941601308317	0.00416892100872174	10.3702623906706	0.0108637542951793	8.38884326605986	0.889139722920674	0.434489402697495	64.1946050096339	1559.54816955684	0.8304	0.000143513805774922	7141.95038535645	0.000127213862306318	6366.33745295891	6.22733225291501E-05	3111.16088631985	0.861850042924809	35.3504693786321	67.3915958873491	1582.13813142602	0.8948
142.2376	144.6684	141.2	12.5653629569543	15.7797351511361	22.1548008341307	-0.122031378513275	0.233982261363136	0.393041798643726	2.33505552700725	2.00561125729765	1.99798404459642	5.59515810291696	5.8126339985493	6.0800078884408	75	81	114	0.00354852144939611	7.78693877551022	0.004220197641039	8.67205078757674	0.00236518927298811	17.2074829931972	0.00427341459963476	9.1452797090209	0.00277251145356102	11.2310204081632	0.00434746547538495	8.93124854682058	0.00227952361235018	18.3040399833403	0.00427227252022867	9.19586185478912	0.851873290642787	0.544897959183673	40.9510204081633	1336.58775510204	0.784	4.99765175559681E-05	20660.2173469388	4.28397082854073E-05	17510.8460453225	2.55209189142798E-05	11871.6780612245	0.87568914385178	34.2147505422993	49.3409978308026	1688.38568329718	0.922
144.5668	148.064	148.5676	16.3788381077536	19.4819686890211	23.5910794632208	1.14191196910316	0.649444056933633	0.521774397903793	8.20235800310887	4.21029735842638	2.30834722586131	5.8531261291667	6.09457604562818	6.22323206477797	146	152	146	0.00295443565181177	20.9991836734693	0.0027230820572218	8.90032848281025	0.00226468138275718	40.3843537414965	0.00282606760833189	9.23895898596796	0.00265755935027073	15.0228571428571	0.00293157256387652	9.02049762953671	0.00209356749695261	25.0733027905039	0.00288228136218547	9.31953863343202	0.855071162237937	0.531202435312024	34.7260273972603	1355.1166920345	0.7884	4.76601003196042E-05	22088.7463216641	4.07910482243859E-05	18912.3705136641	2.63093275299933E-05	11163.9908675799	0.886731103960032	33.625693555271	41.7136150234742	1767.77336747759	0.9372
145.2836	150.4196	158.742	17.2978371780983	23.7435535638623	25.804686318574	-1.0257589557748	-1.29914014685424	-1.22582313387796	4.00665648524729	4.21612441392621	3.9936804591099	5.94282404082266	6.19705463345427	6.31695305331367	103	112	123	0.00214743856726365	48.5306122448979	0.00195967784407053	9.45979120001329	0.00177045733259292	67.9970238095233	0.0018861740943973	9.66349290706606	0.00240566430653895	15.2191836734693	0.00203658995487751	9.2620770485583	0.00166996224154138	56.5822573927532	0.0019266107431812	9.70359949079155	0.896471377563778	0.316062176165803	35.0235515779557	1623.92227979275	0.8492	4.90976851648568E-05	22653.3961375412	4.46766705681501E-05	20118.171074359	1.33893670138966E-05	7652.93735280264	0.885502815574961	34.0120689655172	39.6629310344828	1747.21551724138	0.928
198.3484	207.4996	215.442	17.1875017800726	21.9651633237725	27.012105360375	-1.96018102273905	-1.90119440049806	-1.91399771528773	7.04709238085216	6.28244005827498	6.07332701584065	5.58234444225453	5.79068997873251	5.91213361321985	100	117	141	0.00492894627238651	16.8579591836734	0.00220702059536004	8.5962326819689	0.00344474524503678	48.8061224489792	0.00207382195191265	8.99424982521966	0.00424189920866306	33.4726530612244	0.00215867351115831	8.80170843994053	0.00327799693345876	50.4214910453979	0.00209328196344475	9.07695714542085	0.854004742701678	0.512170385395538	47.3245436105477	1351.90872210953	0.7888	2.50523288883156E-05	41979.5963488844	2.17762957801982E-05	35372.7474529956	1.12635241435181E-05	23504.1135902637	0.868475651985955	34.7981489643015	55.8373732921992	1632.451740855	0.9076
160.8624	158.7904	149.8288	18.2234427658442	21.707069535983	24.9740723663563	0.183390230094933	0.0489221516121081	0.0534834757270466	2.60757193049509	2.58400239836775	2.61032414459277	6.05468126412439	6.34022049450171	6.52920110425606	129	135	143	0.00291211995002085	14.9706122448979	0.00227847679941	8.86945231609094	0.00218333506872137	29.5769557823128	0.00242316383116264	9.24759935899762	0.00254493960849647	19.4702040816326	0.00236193717456917	9.06324722447409	0.00207518004524353	27.1903373594335	0.00236734075413555	9.32016953079373	0.853696516667769	0.586277521761393	28.9897593445981	1338.99180747568	0.7812	4.17741551434341E-05	25406.4500768049	3.5771426958496E-05	21646.8859571588	2.35167178572435E-05	15452.1971326165	0.89198015385219	33.3566285472258	36.1986446421008	1806.41465480729	0.9444
193.4784	188.5228	171.0788	8.15322840597514	11.3801880546852	22.717354391742	-0.835288385457212	-0.407631970902778	-0.260299803437905	3.70924061346757	3.27882295492943	2.06775492470999	4.91038066076767	5.46933919299189	6.31147333225664	50	70	103	0.00528613077884215	6.24979591836736	0.00857863694508046	8.13336676897731	0.00429870077282616	10.4251700680272	0.00837504759428684	8.40263003361882	0.006428654727197	2.82897959183673	0.00879195870254876	7.82086210690137	0.00436320351734606	6.74010828821325	0.00860342927829601	8.35147272821878	0.838467159507782	0.648167539267016	53.0146596858639	1257.92565445026	0.764	2.84796401662126E-05	35224.212565445	2.4008144766712E-05	29389.9307114906	1.7805266288295E-05	23592.1282722513	0.828326191391472	36.6589434661724	59.6821130676552	1392.15013901761	0.8632
189.418	180.9508	165.1116	18.2437736228007	16.9931627238722	20.0880846633023	0.0403242780817298	-0.240995198772501	-0.23766160060539	2.60269772391326	3.1554506627597	2.50327073512508	6.16518950338571	6.06134046641164	6.28247023227937	96	107	112	0.00183190337359432	23.4571428571428	0.00338963856465049	9.53726936201474	0.00123827166921192	73.2602040816323	0.00304742680334828	10.0235676946682	0.00153635985006245	36.9351020408163	0.0033063011228094	9.79398473353261	0.0013695182192759	41.8717201166182	0.00326931389356033	9.89692296171698	0.912693053641606	0.256775378961874	38.7400091869545	1736.80064308682	0.8708	3.07569182033927E-05	33359.9820854387	2.80589346811613E-05	30482.5878843209	8.0205372387536E-06	8326.62195682131	0.912944228955912	32.3841086867023	44.411280362289	1966.13544668588	0.9716
170.1328	181.0432	189.074	10.2959003569382	11.4311387779171	12.8538447166597	0.729804339159672	-0.0840853957149939	-0.407651183491509	5.93566723886096	3.38184490558962	2.84900180143009	5.14690752522482	5.3319227645562	5.46439672044946	97	100	81	0.00729629321116203	4.71510204081633	0.00807119197666338	7.65851668496721	0.00482907874033968	14.1887755102041	0.007936368383302	8.18133353992892	0.0062857142857143	9.52816326530614	0.00792782328660303	7.848723876726	0.00568605924124702	11.9662640566431	0.00790991123802946	8.00345015925432	0.770676481051099	1.20403321470937	48.9976275207592	928.021352313167	0.6744	3.16808709098229E-05	31745.1743772242	2.46285617792273E-05	24285.0353102363	3.68437218976017E-05	39376.4377224199	0.817519505605736	37.4586288416076	61.3252955082742	1325.96359338061	0.846
150.0648	157.7648	164.874	18.5812324930291	19.9978369070257	21.0530882295211	-0.874580800744448	-1.15977216815626	-1.39631490960691	3.96387524016181	4.5833199741939	5.06657937660723	6.08225821933505	6.09141020166726	6.09309259117984	128	139	140	0.00292311536859643	16.6469387755102	0.00252942023639948	8.99821462592925	0.00177045733259292	50.8048469387752	0.0023796978322552	9.6070953881626	0.00226105789254479	28.1497959183673	0.00250845612272154	9.32446472216542	0.00197283479516464	37.4723032069971	0.00244889154894326	9.51508004026811	0.857623222615635	0.50834597875569	36.556904400607	1369.34092058675	0.7908	4.28585166599871E-05	24910.0824481538	3.66475136665729E-05	21431.2232400382	2.23870788347233E-05	12283.885179565	0.910133539961575	32.6014913007457	44.7067108533554	1940.64871582436	0.9656
226.278	104.3908	87.8552	13.9552110697044	25.5096467117834	28.3746618122578	-0.0812967297514533	0.508609877036541	0.540871964113792	1.84823515240151	3.04228078457323	3.27684092526979	5.54093958588913	6.41776298068717	6.63176005889759	59	141	161	0.00496359850062476	5.13836734693877	0.00205388398546202	8.40337737423844	0.00341762980702482	14.1964285714285	0.00202253196569426	8.97123839047119	0.00437184506455644	8.29836734693878	0.00206787990248813	8.73375557323229	0.0037040307202278	12.0524781341108	0.00204387189095234	8.88299930068958	0.799307966449167	1.21506612995975	26.6906267970098	1033.96377228292	0.6956	5.31041119625443E-05	20542.269120184	4.13161537252237E-05	16897.0359143144	7.25597243532232E-05	21555.5750431282	0.870178498505952	35.1065246338216	36.6404793608522	1630.97425654683	0.9012
232.154	104.5468	84.7076	8.7751401128415	11.4540390151248	11.9416457090302	0.402364587911506	0.462237518998966	0.509661558947801	1.95183155887159	2.18909787971449	2.14773776958588	4.81487186344619	5.37510994742923	5.34745909141525	36	55	54	0.00874668887963348	1.4330612244898	0.00958667589257594	7.27388527753831	0.00611326588458515	3.71301020408163	0.00964591300789971	7.79580176981115	0.0075261974177426	2.45469387755102	0.0096310273277599	7.52276658172666	0.00638096614263008	3.41149521032903	0.00968905675592331	7.69053996973197	0.731322877015108	1.96204188481675	47.6976439790576	756.013089005236	0.6112	5.07585214567422E-05	19790.1865183246	3.70528302236563E-05	14482.4314679836	9.84029619508972E-05	39561.1629581152	0.796295800542589	39.5260545905707	59.1816377171216	1194.30223325062	0.806
230.7832	107.6908	90.2264	4.50592917831606	11.3705934480132	13.1013565343441	0.295210378679406	0.165135925679163	0.0539840411556059	2.68302829207846	2.14463629094925	2.12116078647715	4.1516939319102	5.45739041466217	5.67290062060441	23	54	61	0.0102840483132028	1.10163265306123	0.0117029804969448	6.98096119510193	0.005491418506178	3.38350340136054	0.0117908465290805	7.81838252339536	0.00673086214077468	2.49836734693878	0.0115564399887807	7.57991374783096	0.00658426891058339	3.20033319450229	0.0116894831639046	7.60116568712834	0.721705172766009	1.65809768637532	46.1992287917738	751.582262210797	0.6224	4.86046335524103E-05	20630.059125964	3.47365197126666E-05	15032.1504552673	8.4126026981873E-05	32691.646529563	0.815252402501438	37.961262553802	62.3868962219034	1303.75944524151	0.8364
222.6064	135.3924	126.9948	6.70249797016008	49.1498038881133	55.8462207580782	-0.581143985039567	1.0379334465117	1.00334894868982	4.2162200822891	2.27166931684697	2.21712985145719	4.66607430383189	5.77358651739856	6.01111079445417	44	140	155	0.0143280299875053	25.3069387755102	0.000779221452428263	7.49453204025185	0.00896038687583847	48.565476190476	0.000766502779192358	8.02044905561579	0.0101004581424407	21.9714285714286	0.000794899675035833	7.83899835970709	0.00833975014922437	41.167430237401	0.000778097427564143	8.03380363514206	0.785634258280364	1.39689181111775	49.6682606096832	959.962343096234	0.6692	3.98037430022634E-05	29469.9324566647	2.94849330618612E-05	24568.2924242852	7.00508003407533E-05	29595.4237895995	0.828236785848987	37.3845428840716	73.6211121583412	1371.53628652215	0.8488
205.706	124.4604	120.0624	18.3694628119605	31.4837042267901	42.102723263941	-0.878906953143182	0.890588622193553	0.821956662910587	2.50374991702198	2.22588973470554	2.03250306524316	5.49102672765449	5.814778977228	6.22899793694368	82	120	143	0.0146815493544357	7.46163265306123	0.00281193966743577	7.53570999435891	0.00961007277060453	32.2470238095237	0.0027500741866105	8.0659401488774	0.0112449812578093	25.289387755102	0.00282367419000585	7.94092130847652	0.00945652764076308	32.4435651811745	0.00278053124169243	8.12066204856795	0.748279474232007	1.79361022364217	47.0945686900958	810.982108626198	0.626	4.49298691955151E-05	23336.4146964856	3.26415772233795E-05	17986.2313490952	9.19547370880486E-05	35574.757827476	0.798684482075085	39.0530712530713	68.1793611793612	1213.66928746929	0.814
160.7376	105.7528	101.9388	17.1892741626865	42.8455889463548	50.2822101200812	-0.616596378996767	0.354655343979001	0.244011501021474	2.59693014875485	1.64242840826533	1.57327383986054	5.95499366984737	6.82730618740491	7.08257583049456	83	137	157	0.00280783007080387	4.70612244897959	0.000948594277655427	9.04330991564207	0.00163054167245134	28.6011904761903	0.000936830646084556	9.72531980261829	0.00180024989587668	25.1326530612245	0.000942870030283984	9.61451117344264	0.0016616358483146	29.2440649729278	0.00094093531403382	9.70893094925319	0.833993716629356	0.7209797657082	23.3663471778488	1224.06389776358	0.7512	7.82165207242666E-05	16200.5617678381	6.39136438394329E-05	13682.6212781885	6.43632994286172E-05	10734.0415335463	0.886859164716255	33.9414802065404	31.0740103270224	1757.97848537005	0.9296
206.4488	91.9888	78.5008	27.941069746164	16.0125411649744	19.1480651596969	-1.17286505395008	0.595631664640909	0.693929162730721	3.64719138288012	2.09486194116682	2.57469389198767	6.09117525074477	5.5177337319908	5.71279799251525	120	76	92	0.0103563515201999	2.4934693877551	0.00508700633993112	7.48264872491453	0.00591586549585827	12.704081632653	0.00505804682723818	8.21674920552683	0.00647496876301541	9.8338775510204	0.00507392176491243	8.12911287587312	0.00592995317618079	10.8625572678051	0.00504880910306113	8.24724195225009	0.756080236987072	1.72236180904523	49.0238693467337	842.804020100503	0.6368	6.60462959182553E-05	15526.4566582915	5.01901474640602E-05	11634.4269411992	0.000109789408765692	28192.0665829146	0.862056867602488	35.2784471218206	69.2730923694779	1585.1838464971	0.8964
237.8564	106.7568	87.3672	9.09130238414717	13.9777842936568	14.9092040082628	-0.11617995949677	0.128165764290703	0.183532290832086	1.52030483810552	1.5527624709016	1.53383292498994	4.65024898428196	5.1766074054253	5.24973215244304	36	58	61	0.0146522282382341	1.32775510204082	0.00632530380236484	6.79962713789034	0.0102644586746263	4.0531462585034	0.00637961316110483	7.25838141361365	0.0118084131611829	2.52122448979592	0.00642321988490702	7.04356140361869	0.010295411758359	2.99916701374427	0.00639436206783531	7.26107005761207	0.633304377590991	3.18153607447634	43.33359193173	485.792862684251	0.5156	4.8144874630366E-05	21103.2754072925	2.99567227244214E-05	13589.9011200835	0.000156717221833737	65587.6136539953	0.766145683627947	41.1	63.9030927835052	1058.37835051546	0.776
237.0156	119.4428	103.8884	6.42782674315355	11.3176114158421	14.1362776373415	-0.564111118529955	1.71023511299619	2.31378867387805	2.66643876454893	11.223532152677	13.832572625856	4.44560174721563	5.13040980022142	5.32987401013922	38	94	118	0.0175643481882548	2.80979591836735	0.0144048487999126	6.70527414661588	0.0114741687491322	5.66284013605442	0.01435526709971	7.38778994278656	0.0147818408996252	2.63877551020408	0.0132446246774822	7.0883981520671	0.0133296882234096	4.56684714702207	0.0141974173516708	7.18348363904264	0.726465267232157	1.74870466321244	66.6204663212435	754.44170984456	0.6176	4.22101864260944E-05	23724.2124352332	3.03454762417052E-05	17447.2618314999	7.56378947820311E-05	40208.6224093264	0.795488888212262	39.2994071146245	88.4644268774704	1196.45355731225	0.8096
180.7852	102.3252	95.2616	17.1714839475218	22.270146945182	27.2781591285043	0.0403356684611449	0.987661327555469	0.822869271644961	2.04371356384664	2.78062594389627	2.49164285075973	5.7583351421958	5.83279497229643	6.25870422634034	73	93	106	0.00856709704289882	4.28326530612245	0.00512701918813042	7.9930876717154	0.00437137014669831	66.2130102040813	0.00432509072116593	9.13958231803524	0.00501357767596834	59.409387755102	0.0043142095145435	9.07821059655669	0.00457691427683289	58.3536026655561	0.00437089820377788	9.08482111730172	0.791118230581086	1.35735207967194	45.1148213239602	993.174575278266	0.6828	6.39392592729268E-05	16131.5963678969	4.99234982236618E-05	12933.0565859268	9.32986823221493E-05	20056.1775043937	0.880106922513508	34.7033786748574	61.1526985519965	1695.34752084247	0.9116
250.8404	164.4224	155.9952	4.86527777624259	39.7046493277551	46.9021276378802	-1.08291583583335	0.87870388481254	0.778752898840393	3.04833606635803	2.12259346651326	1.98696099852798	3.49242421037934	6.14513824095684	6.35014679389167	20	120	139	0.0105216159933362	7.76775510204082	0.00130322919629985	7.86879198736871	0.00739166840205488	25.9749149659863	0.00129713803068076	8.44402662810393	0.00827288629737612	24.7065306122449	0.00126861934341387	8.32278884540563	0.00680318366583699	37.6205747605164	0.00126623022433651	8.50989150160098	0.775215361335615	1.63228974831185	33.2295887047268	909.108041743401	0.6516	2.78889908636862E-05	38208.6132596685	2.09889302794356E-05	30361.1874880441	5.33805828893042E-05	52211.6132596685	0.808941043275824	39.4473033151905	46.8535378525482	1242.8208807521	0.8084
231.8892	139.2012	132.5864	11.7149871258999	26.0359581840193	33.1871802815485	-1.30359789714479	1.50671979945441	1.34956809453064	3.76760849895026	4.04189854378927	3.50751981362488	4.78980306632683	5.56143531223573	5.98315821898016	59	121	138	0.0189707621824233	16.6653061224489	0.00329213253606673	7.34988450688542	0.0127428097089173	29.2427721088435	0.00314354908411181	7.85449976365412	0.014624573094544	20.3048979591837	0.00328145849373855	7.72654299961549	0.0127652281492455	43.8517284464806	0.00310408280775725	7.90691856090404	0.769939432032877	1.57933579335793	60.0615006150062	894.924969249692	0.6504	3.52670824623307E-05	29262.3579335793	2.6263850946419E-05	23365.0730977498	6.28264080048964E-05	39509.8376383764	0.803307161385785	39.2544378698225	83.2396449704142	1225.94871794872	0.8112
238.4688	147.9784	142.5456	7.94653550674758	21.615909267019	27.819818846283	-0.740020630967243	1.36057161086404	1.15368317324857	2.65507817686086	3.91177546534582	3.36554912259347	4.801736095304	5.75990257899023	6.24052905636543	38	92	117	0.00866738858808835	8.50448979591835	0.00423994864041557	8.0034952854519	0.00551238777824074	52.1709183673468	0.00385222611258349	8.72283714363394	0.0067085381091212	47.1310204081632	0.00382840651940894	8.64904140109042	0.00558995878608831	55.2632236568098	0.00377345053985863	8.79535753930647	0.828286623049155	0.863710113574905	55.8361276365603	1187.2866414278	0.7396	3.25421010363054E-05	31246.9843158464	2.65855428777998E-05	26242.9069499571	3.04495076722234E-05	24696.9859383451	0.863258155180836	35.0746003552398	70.4280639431616	1597.6163410302	0.9008
120.0936	74.0328	61.4064	48.9936081447366	23.9877411224984	20.9118827234661	-0.0605966976194979	0.60963296574319	0.490479436974576	1.45611623821607	2.3429645910289	2.11538015970169	6.99914178316022	6.3612596464065	6.12458939561195	161	100	82	0.00213211162015828	15.308163265306	0.00180308376427944	9.42745506413073	0.0021616427183118	12.6896258503401	0.00183360914964281	9.41434770210979	0.00298808829654312	5.79102040816327	0.00180672531398562	9.01416314182256	0.0017827154831537	28.7355268638067	0.00177441878784755	9.69366159924346	0.899886844416919	0.377904220009483	27.2797534376482	1631.23707918445	0.8436	0.000166788585521384	8278.00142247511	0.000145573513953324	7626.25680040674	7.51853264273758E-05	2492.65813181603	0.881444418441472	34.3945993031359	31.1951219512195	1713.55052264808	0.9184
139.3268	134.9592	124.9032	30.5361425487896	16.263453980013	49.4879806595501	0.322865398208643	-0.378903540643684	0.279002263742285	1.64207864299045	2.12062164067084	1.43500716567483	6.35413001845071	5.83128585672427	6.7584199471809	104	63	142	0.00499625156184924	7.23469387755103	0.00695581787444791	8.23936436884935	0.0042625468554769	7.64030612244899	0.00707663195048427	8.39887492873369	0.00688313202832153	1.3534693877551	0.00704656256991758	7.58565140222851	0.00435383632496595	8.86422324031655	0.00693508685424448	8.41683179301241	0.874839788550642	0.450073782587309	48.2444663059518	1472.41367437285	0.8132	5.63189966297668E-05	18067.2715199213	4.98835992870536E-05	15604.8348399707	2.24857540060373E-05	9041.64633546483	0.838845374838881	37.0373482726424	51.8309990662932	1426.43323996265	0.8568
147.3528	71.4752	49.8864	29.0299764409136	19.7060139287477	15.6321174202345	-1.55124627063895	0.0873241014077228	0.33021038504857	4.23029707639262	1.55139069193508	1.81579402961017	5.92921471322139	5.95513794946018	5.68207970190014	111	70	58	0.00439283631820075	5.54000000000001	0.00327165714661857	8.3558804928306	0.00341365287611643	7.30187074829931	0.00344618042318857	8.60027331159714	0.00390503956684716	3.71836734693878	0.00319144705387982	8.37132724704977	0.00279818852376691	10.2182423990004	0.00323840625883402	8.87515659947861	0.835663555348104	0.702802749867795	36.1253305129561	1236.96404019038	0.7564	0.000139590675427766	8408.77683765204	0.000119968757914412	6848.83686557551	7.61482887196107E-05	7001.69487043892	0.840450220518207	36.4376438104004	44.7533364012885	1450.09894155545	0.8692
165.4608	96.116	71.0944	36.496044489232	23.1458709924686	17.4327246476275	-0.69552778275229	0.0773054807039237	-0.031047679054728	2.61221550937796	1.71818571327337	1.99189067423854	6.73206695728813	6.22233828155755	5.94167614089155	153	86	76	0.00346555601832572	9.07102040816327	0.00430973789895667	8.77496030020761	0.00319058320607152	12.1539115646258	0.00438798433976142	8.89930125845523	0.00645431070387338	3.10040816326531	0.00440122844936589	8.0427667927892	0.00335432220470403	11.2665556018326	0.00431862759791238	8.89338668462133	0.89088494902731	0.323863636363636	50.5056818181818	1591.05018939394	0.8448	8.09679650066398E-05	13110.571969697	7.22168230705407E-05	11634.3366972824	2.43045295413097E-05	4610.04403409091	0.876396117631306	34.5242675994753	53.0445999125492	1681.9960647136	0.9148
145.728	138.4404	115.7616	7.97959998997443	7.03113417877941	4.91592976353406	0.386334887814983	0.0159144593979776	-0.627920611622562	1.84326797224357	2.18892840239692	3.0116936452549	4.68619548864522	4.77187204820058	4.24316716284539	32	36	28	0.0131548521449396	0.969387755102041	0.0208366649952976	6.60532608399085	0.00935446457494563	2.13775510204082	0.0210411359136222	7.03853428113939	0.0109600999583507	1.4465306122449	0.021012150770766	6.79541239167138	0.0089892088209116	2.12161599333611	0.021022366319593	7.10098141843914	0.67809643417949	1.94448252227553	62.3474982864976	627.947224126114	0.5836	5.25037034626533E-05	18965.6531871145	3.58255812832225E-05	12781.0348023929	0.000100002947530379	37580.1788896504	0.770965607321349	40.3258996452103	80.3988849467816	1090.83476938672	0.7892
124.7132	101.8972	73.3824	14.2302405376719	10.3196236443002	8.62592431221142	1.51335992742941	1.21989891724467	-0.105454117399647	4.06917311573981	3.42551323883927	3.66569156907607	4.90372782115171	4.8246246307059	4.92817556052661	61	48	55	0.0145446064139942	6.18734693877552	0.00895637619014631	7.20100577001724	0.010947767712527	8.51530612244897	0.00876694136845783	7.56725248615323	0.0165141191170345	1.14530612244898	0.00924104379883603	6.76101674348994	0.0130934268156003	5.47438567263641	0.00899843613384907	7.30486328519288	0.786983681058236	1.01029748283753	74.2517162471396	1004.96109839817	0.6992	8.7878916064681E-05	11601.4862700229	6.75338563472674E-05	9360.9525571831	9.81152921782427E-05	10326.8094965675	0.803342533047233	38.7231968810916	89.3333333333333	1239.01949317739	0.8208
195.6872	70.2552	54.308	7.19648220730101	17.9196783721137	18.5699201936896	0.260032815938812	2.69597312870364	2.71225202084507	4.03903268809462	11.8383334458023	11.6938447257546	4.81826757441022	5.3066013625084	5.22984189855608	59	132	137	0.0117647646813828	25.3848979591837	0.00485225445527516	7.47552349612023	0.00958657272432759	50.9209183673469	0.00456867424170005	7.70825423518668	0.0132811328613078	19.7759183673469	0.00486603860751902	7.2738608927703	0.0101850870481044	30.2628071636818	0.00474931008510607	7.62960312577744	0.759711114304177	1.44717444717445	50.2100737100737	870.152334152334	0.6512	8.71477891799914E-05	12078.7045454545	6.38254381721691E-05	9614.34431745938	0.000141595771618632	14641.730958231	0.772777426229987	40.5771777890983	63.1008660213958	1090.63117677025	0.7852
160.8004	145.8256	122.5584	26.5361142566126	32.7192418102865	39.3572177553241	-0.803083123904479	-0.482085255654699	-0.134758266358384	2.48004560995777	1.9754101882053	1.6576084648766	6.29051106818505	6.70597432298617	6.96981591610481	109	127	145	0.00171561849229487	35.2477551020408	0.00100300818574755	9.82385071131506	0.00143133358785692	44.398384353741	0.00103681672950077	9.96502715353367	0.0021491045397751	14.7812244897958	0.00101772469761413	9.49537419210129	0.00150447517615959	51.2024156601418	0.00100606469555552	9.96603043208839	0.933903392330383	0.164601769911504	26.1017699115044	1903.53539823009	0.904	5.44683838087171E-05	22339.0951327434	5.14473756964555E-05	20579.1930378564	7.54684095321095E-06	4503.23716814159	0.898081976156576	33.223534373682	28.9426402361873	1846.10754955715	0.9484
116.6364	99.7784	74.5316	24.7248093023991	26.5926548776161	23.8044743995745	-0.325232013723038	-0.255473934887875	0.113052790016034	3.17759096717359	3.32477499037404	3.35586037076201	6.25614090605712	6.37364215104817	6.37749409527892	126	138	123	0.00566897126197418	5.03224489795919	0.00156226980893342	8.38709005857899	0.00323613714193158	26.7023809523808	0.00156214730571166	9.18682561455811	0.00371045397750939	22.5469387755102	0.00149334007732486	9.09409995546748	0.00346325918275409	27.3356934610578	0.00152444481683244	9.16396995682702	0.814456007653028	0.995543175487465	24.9688022284123	1111.01002785515	0.718	0.000130312902381829	10740.4568245125	0.000109866311877493	8602.31339157225	9.77728245500458E-05	12238.3309192201	0.869208454408779	34.9787610619469	37.1017699115044	1629.87345132743	0.904
188.9236	195.1316	203.3748	15.4372070997315	9.06645914566431	12.8745300869585	1.2139347482766	0.5369578332099	-0.34034055339172	3.57365854435773	5.32950688598876	5.22943412385027	5.51062913236497	4.81004131197397	5.20887989209797	66	61	82	0.0141001249479384	3.04489795918367	0.0207504699672402	6.79203479492236	0.0106006901059743	4.60459183673469	0.0198159830542611	7.13342416503919	0.0149937526030821	1.51795918367347	0.0202159749507419	6.654658493675	0.0119079565799409	3.95585172844647	0.0202482816407642	7.07027485646897	0.75735290651897	1.12388326384753	85.2692078618225	892.4187016081	0.6716	2.62229310211972E-05	37952.9946396665	1.97899458278821E-05	28861.9541287618	2.99846797276091E-05	41815.9189994044	0.77473572167423	40.0251762336354	100.970795568983	1108.89023162135	0.7944
192.5852	191.552	201.406	11.0390009040674	8.08495491638636	10.3074130605114	1.34708977706818	-1.48436314538559	-1.71433210728239	3.73552856654154	4.41875598235494	5.0760376236444	4.86536317533536	4.48113390869147	4.63205290847045	46	42	54	0.0283735110370679	0.943265306122449	0.0711529706616851	5.76394794609207	0.0205918251654404	2.22236394557823	0.0691856666735631	6.25400147450699	0.0271873386089129	1.38979591836735	0.0694725154894705	5.95486782295838	0.0224481296058615	1.83548521449396	0.069282566521337	6.15882021061214	0.643919000002017	2.33042212518195	110.813682678311	538.026200873362	0.5496	2.66560059972331E-05	37190.1572052402	1.719097035017E-05	23913.5343988703	6.18458386364544E-05	87010.0553129549	0.748880712596828	42.3856763925729	138.333687002653	980.854641909814	0.754
247.33	137.8488	123.9632	3.2179962709736	11.9771590354307	15.2284288670893	-0.266915513567022	2.35678908478151	2.00464186623142	2.74254722739022	10.219533713884	7.77351826749481	3.69418000019257	4.83348088441489	5.18153600347294	19	86	99	0.0208852977925862	3.26816326530612	0.0121310548853204	6.67245350870562	0.0171713030450279	11.0051020408163	0.0113746637011588	7.06567381720103	0.020902290712203	7.29795918367348	0.0117718911103256	6.81322061508149	0.0165703898538734	9.37984173261142	0.0115576327545562	7.15697013458002	0.724145767332132	2.2695652173913	73.1351170568562	726.159866220736	0.598	3.41956638210742E-05	29275.947826087	2.43559273174045E-05	21595.0074990716	8.2076553066337E-05	62210.0628762542	0.780804879543022	41.8778705636743	88.160751565762	1090.59394572025	0.7664
234.6172	209.5464	215.9048	14.191358784838	13.2622414033224	17.7078439387747	-0.466948082140658	-0.928346371476272	-0.860870948888566	2.20130965944059	2.85983811838258	2.72522980378764	5.51596413392275	5.406970432093	5.80944847408402	53	57	72	0.0102054144106622	4.0065306122449	0.0184047509793493	7.42651320915341	0.00743866849460874	6.76530612244898	0.0175821785381256	7.79289263956054	0.0091265306122449	3.9469387755102	0.018215588283067	7.46232018842357	0.0069558342083274	8.20533111203665	0.017423067278391	7.93845610284633	0.788173838087539	1.04903078677309	72.9692132269099	1011.80843785633	0.7016	2.09442486839511E-05	47528.4538198404	1.64968111479455E-05	37489.6179354986	2.22072506182005E-05	49338.1174458381	0.834083960067215	37.1244153414406	87.1973807296539	1403.18989710009	0.8552
203.196	195.0164	201.8748	10.9545599637776	7.27143253011399	7.77143004600826	-1.02256764209966	-1.13165947404495	-1.63894959800031	3.02366215846835	5.06213822833714	6.60350210519194	5.03311088945443	4.73760085154321	4.68811896773818	48	46	48	0.0154422324031654	1.20571428571429	0.0228372798851408	6.57088998440529	0.0109126984126984	2.65901360544218	0.0224978896294138	7.04126155269721	0.0139775093710954	1.48816326530612	0.0230727571723831	6.64868090399787	0.011482269726223	2.16409829237818	0.0226848859128977	6.91480759694713	0.710183426818153	1.81170991350632	72.9081836327345	702.631403858949	0.6012	2.53661795560516E-05	39193.5968063872	1.80537626479144E-05	27769.4159453421	4.53214943756505E-05	72033.2994011976	0.767954417126466	40.4217479674797	93.1117886178862	1078.83739837398	0.7872
212.7168	180.4208	183.728	12.9697416227155	14.8998968909184	19.3061341547188	-0.465918954009915	-0.247608975042629	-0.302185771100032	2.24195251859441	2.14347644809589	2.05967406557175	5.52987718467496	5.79913864185595	6.12715752938901	55	70	84	0.00841782590587255	1.52734693877551	0.0142296428896369	7.26002350743249	0.00386702299967605	8.50297619047619	0.0134424352533144	8.35139554823979	0.00462140774677218	6.71102040816327	0.0136973514686903	8.14803590325505	0.00420014498332207	7.40399833402749	0.0136201347478483	8.26317313487232	0.744542756252666	1.39108910891089	54.6014851485149	829.424504950495	0.6464	2.75155828541075E-05	36231.2079207921	2.04987960383185E-05	26951.5024080982	3.76222329649961E-05	51291.6132425743	0.861927266838403	35.1485765124555	72.1165480427046	1588.57117437722	0.8992
254.1844	163.1104	155.424	2.13279081018275	8.40803257843355	10.7398800738183	-3.66031877156439	2.0126993025183	1.98108661462214	17.4216114090445	6.72293682900777	6.59541727782037	1.51056264363698	4.35331056247503	4.71405769502158	16	46	58	0.0435881715951689	1.3	0.0301543251984511	5.5924263367476	0.0335765045814241	2.80527210884354	0.0316259305593586	5.86219327023933	0.0420368179925032	1.45020408163265	0.0325391790484059	5.46470554823449	0.0350820435952604	2.23406913785923	0.0319200210821039	5.83128425890978	0.597819340577917	4.98073555166375	78.0245183887916	385.740805604203	0.4568	2.71388726752424E-05	36642.8826619965	1.59355356783986E-05	22323.9300242009	0.000140686671588039	174619.363397548	0.683439814588366	49.9452307692308	108.778461538462	702.019076923077	0.65
246.1952	138.9564	124.6856	2.47780083138254	8.51314859731698	10.4029780659194	-0.155999002684734	2.60454874605452	2.17929378033273	4.56465535621915	14.6397220157729	11.8453791808583	3.28441436163466	4.68290050385595	5.0478842772849	21	74	86	0.0251411911703456	1.95877551020408	0.0268728499355509	6.02513188902216	0.0183629361608591	5.51870748299319	0.0254724687858303	6.49612414065413	0.0205401082882131	3.92612244897959	0.0244356944332209	6.37187619713223	0.017305887922237	5.09787588504789	0.0254462814654867	6.57764171420649	0.634074091995154	3.04758250191865	78.8557175748273	493.445126630852	0.5212	3.41645386165776E-05	29126.6462010744	2.13948297072434E-05	18734.004044037	0.000107145708837418	85823.3108211819	0.718345635700417	44.3233665559247	106.06976744186	863.281284606866	0.7224
193.262	196.384	203.4812	8.64479936146583	7.7836073898932	8.3149050842448	-0.0672479087400721	-0.787970672059199	-0.8049342291728	2.15258897321486	2.63443682702666	2.85569040724724	4.97886683371	4.74214995677741	4.87617820496024	40	36	40	0.0124281549354436	1.63469387755102	0.0179996422386365	6.88575384275125	0.0089582176407978	3.06335034013606	0.0174976225871124	7.34498532030091	0.0118410662224073	1.85510204081633	0.0179237267166457	6.99436196729667	0.0095217510543729	3.29321116201582	0.0175990796939309	7.35705059395367	0.727426424760625	1.61834509300834	61.651699807569	763.797947402181	0.6236	2.60083969769503E-05	38291.3720333547	1.90423868631865E-05	27679.8783425603	4.11273372299142E-05	63353.6023091725	0.773990988238251	40.5822720326032	75.5308201732043	1094.1604686704	0.7852
203.9544	193.7032	199.68	8.71767862679051	8.09784599507795	11.628585468577	1.22400341340413	-0.898336684827622	-1.05523990333516	4.44861456189282	3.70926940037668	3.92965749197644	4.89323972626898	4.89150334806259	5.31540625712317	49	45	63	0.0207953352769679	0.937959183673469	0.0431797572190728	6.07326642971004	0.0130237256467213	2.48256802721088	0.0444370574742853	6.65508225355298	0.0148238234069138	1.97061224489796	0.0446491579152622	6.45699491470709	0.0129407762731099	2.70595585172845	0.0438510151490991	6.68679481448765	0.646436984746046	2.76549663928305	80.3383121732636	525.35997012696	0.5356	2.55485080675519E-05	38842.7923823749	1.65715049474575E-05	25025.9359409183	6.97432677110748E-05	108772.439133682	0.769816466138014	40.6265306122449	112.625510204082	1079.99387755102	0.784
240.7504	132.248	116.7968	3.58330850472018	11.6766132076043	13.7782259293423	0.65060185902845	3.88781654823782	3.52883968126967	4.57038873574283	22.4923076681839	19.1611187327973	3.8087117550285	4.65629268678412	4.99526085869873	25	99	110	0.0223450229071217	5.97510204081633	0.011673030125904	6.48360658568521	0.0167692714841041	13.3456632653061	0.0108769551260421	6.84254699859854	0.0214700541441063	8.22122448979592	0.0115818824249239	6.52438971677113	0.0165180029631551	14.5697625989171	0.0109530225833779	6.87413151403247	0.716788614604947	1.88552631578947	87.1973684210526	723.625	0.608	3.68501464590616E-05	27188.1348684211	2.5997871804558E-05	19856.9446658664	7.28881414435974E-05	48252.2973684211	0.763601778562673	41.8140020898642	110.835945663532	1037.22570532915	0.7656
184.8644	195.8308	205.9884	6.93988563594531	7.66152539381029	8.84539798087118	-0.115756737456004	1.57652733315403	1.77626485524079	2.18759832958442	5.37238470010809	6.00963265551142	4.70638347396811	4.56329945124487	4.66314154809171	31	40	49	0.0162872136609745	2.83224489795918	0.0201096763671334	6.65707391404358	0.0122287010042111	4.89838435374149	0.0197482765290141	7.11440855963613	0.0159653477717617	1.37510204081633	0.0208901216870258	6.60184596108179	0.0132939541191448	2.93669304456476	0.0203543481702741	6.87436838404782	0.711481339435056	1.8788881535407	73.8352084712111	709.283256121774	0.6044	2.62543452298731E-05	37908.7849106552	1.85158613657414E-05	27224.4106853074	5.03361904920636E-05	69637.4235605559	0.754204264283334	43.147391070468	86.5911780527165	982.202797202797	0.7436
205.452	208.0168	218.522	12.2824955119064	10.348860698647	12.6054875351967	0.666410683812588	-1.88378331340808	-2.04211338292499	2.34443668718063	6.40874538850612	6.96813351471586	5.35139392011706	4.76686939584249	4.95025161993128	51	56	68	0.0167363598500625	2.05918367346939	0.0267527070651454	6.65572801643801	0.0122818472627146	3.74489795918367	0.0255704516989482	7.04607890968635	0.0153675968346522	2.26204081632653	0.0265880127143614	6.73699433391162	0.0123419698268856	4.32236568096627	0.0256592950887122	7.05520726991041	0.715570563885822	1.78795811518325	74.5824607329843	725.452879581152	0.6112	2.29239380446311E-05	43384.6564136126	1.64564297255733E-05	30962.7433501532	4.07676696493757E-05	77806.1917539267	0.751345373959263	42.202324352879	90.6555731642895	992.181193872161	0.7572
254.3784	164.1212	155.3288	1.34373116358891	5.95060589856193	7.30232090228853	-3.3433833768334	2.58831206561541	2.18526255805058	16.7656538172505	10.7239572345274	8.31732223800508	1.48696171271474	3.81911017276775	4.22458202504395	10	43	47	0.076120283215327	1.4934693877551	0.0543165810483341	4.98874763762055	0.0610068432134755	4.03146258503401	0.0526349772323976	5.37713241314798	0.0773304456476469	2.40979591836734	0.0567913746201227	5.03471252280362	0.0631190911880569	3.37359433569346	0.0545170537707865	5.29444520964686	0.553285301689507	6.85840707964602	105.495575221239	298.616519174041	0.4068	2.71094753882078E-05	36613.5034414946	1.48163615780367E-05	20528.1842429438	0.000189908848708407	245199.981317601	0.632718930189346	57.6271777003484	138.254355400697	532.567944250871	0.574
251.3004	141.6152	128.082	3.26713327551846	7.69368110594662	9.52781590922075	-1.46360048321647	-0.102358178251869	0.153543545133898	6.14151348331865	10.6279278096728	9.11072579304436	3.41478684532628	4.50665033710825	4.77352853210816	22	80	90	0.0299621824239899	1.23224489795919	0.0301979202242796	6.00511206450621	0.0229280913045492	3.22746598639456	0.0305432689659705	6.41210988811318	0.026539941690962	2.9	0.0301994140573224	6.23846789696044	0.0211960482243879	4.35610162432319	0.0303319667939903	6.50797878168523	0.655287319104395	3.41252864782277	87.5087853323147	523.797555385791	0.5236	3.32622603513243E-05	29927.140565317	2.18696207989459E-05	19589.3969610376	0.000113588092101459	101496.365928189	0.714675813199928	45.6447219069239	111.979568671964	833.155505107832	0.7048
238.1024	131.9576	117.048	4.63636864798303	10.8624031521574	13.2461955292831	0.0191383134365253	1.65249179323678	1.39708592144705	2.91043006762792	6.0861284519931	4.92530930646826	4.19843556956576	5.01971110512753	5.39634862061389	29	72	80	0.0153795918367347	4.98734693877551	0.0142372894311714	7.02165230984569	0.0109810293164883	10.8061224489796	0.0132884904250282	7.50601193515416	0.0137912536443149	5.50000000000001	0.0141141648717937	7.15462688251052	0.0110780927216741	9.4822990420658	0.0136130837846352	7.44988744780608	0.748042396064412	1.73257287705957	66.4752851711027	817.257287705957	0.6312	3.72637869129999E-05	26801.9816223067	2.74812334789287E-05	20349.462364496	6.79370010696066E-05	43795.5164765526	0.800989462210463	39.3476543209877	87.0276543209877	1215.61432098765	0.81
244.246	143.8964	130.1568	3.86718036817524	9.31193143445547	11.691715603794	-0.264400473965213	1.11984937995415	0.827886917754235	2.94205023358668	4.47361360775547	3.40485325920874	3.97414128342065	5.06560705815557	5.43961665602746	23	63	70	0.0127946688879634	3.40285714285714	0.0194642014857135	7.02537339643947	0.00886277129899568	8.43112244897958	0.0185546441271909	7.5703556145298	0.0106665556018326	5.4930612244898	0.0190750543567714	7.35474523964247	0.00873247836308656	8.29820907955019	0.018549510351398	7.5821632267863	0.745329950489507	1.45121193287756	68.3809819763828	827.626476072094	0.6436	3.30967105117735E-05	30080.1845866998	2.44628574950496E-05	22615.4782567133	4.9838556274949E-05	41917.6544437539	0.816472540695311	37.6179401993356	88.4238253440911	1317.48030374941	0.8428
189.5316	201.4452	213.9156	9.18735007714412	5.37942347840361	5.93987176965968	0.870354548836882	-0.817993372187769	-1.458827609369	3.93660833361034	3.95381964192978	7.27963136779704	5.07859056120005	4.34738094135397	4.41334514312629	54	36	47	0.0227801749271137	1.04489795918367	0.0458335477277581	6.03410368196981	0.0175632115090935	1.7687074829932	0.0448740397902822	6.42015843959542	0.0228781341107872	0.924897959183674	0.0458283537048398	6.00574682604723	0.0187196401055301	1.51770095793419	0.0454015843308804	6.25424563913532	0.638856458920978	2.61065877128053	89.2931162102146	523.229459659511	0.5404	2.49475901327038E-05	39769.1517394523	1.59283425882756E-05	25420.9660819941	6.5456895610444E-05	103318.384159882	0.705784762021019	45.1441441441441	107.063063063063	820.96509009009	0.7104
244.1628	148.702	143.1592	8.71960412862878	12.0336360257405	14.0704603819491	-2.82981420908773	2.61296588908009	2.87030620419421	12.6624234396197	10.6240576018048	12.3164898517095	4.31411645073948	4.6105325140298	4.83938012795025	57	73	88	0.0501537692628074	1.90612244897959	0.0189383436091616	5.64738403877398	0.0388936612059785	4.05867346938776	0.0198740159387372	5.91148896094882	0.0490269054560602	2.20163265306122	0.0205074174439047	5.59520217583899	0.0416442822570981	3.54310703873386	0.0201617391796988	5.87997213156441	0.644488646988807	3.34206471494607	102.590138674884	504.628659476117	0.5192	3.12727072779243E-05	31883.906009245	1.98032006177693E-05	20947.9059668935	0.000109335398029634	101176.403697997	0.724290722083252	45.9299145299145	135.549287749288	853.297435897436	0.702
240.1004	122.466	105.6456	3.93679055068974	5.12968264125569	6.49362769490213	-0.588837291385846	2.12985747371842	2.1394081548481	2.32139593820026	10.8001820739143	10.1522600591176	3.78138486458342	4.04254329311315	4.34288122710301	22	46	54	0.0320313202832155	2.09265306122449	0.0524596919021277	5.83501434228631	0.0252050650192051	3.11011904761905	0.054261558051853	6.13347653667674	0.030396668054977	1.92938775510204	0.054590701332921	5.87320205404769	0.0244967692726947	3.76093294460641	0.0521518766534535	6.19343165243117	0.639513537441248	3.51020408163265	90.4489795918367	487.287284144427	0.5096	4.03433451501295E-05	24565.6138147567	2.55031587558259E-05	15903.2265166894	0.000145096888144854	83947.2103610675	0.678068134179654	48.3980815347722	113.947242206235	711.28896882494	0.6672
253.9436	173.1488	166.4584	2.29809030283842	10.2487979080476	11.5528814345167	-3.14419742679995	3.18344104802541	3.04376737665903	15.4903298981187	16.4771964186091	15.2005261010037	1.80724789585662	4.66232070539361	4.87007110003842	22	80	90	0.0296279883381922	3.7330612244898	0.0190313038195129	6.02967306429017	0.0251490264473138	6.76615646258503	0.0181428798068339	6.2455488061541	0.0311470220741356	2.67265306122449	0.0193932877596197	5.94015116278595	0.0238639633874612	5.56643065389421	0.0186181607694622	6.33775427180053	0.669431712737327	3.21266968325792	85.4057315233786	551.711915535445	0.5304	2.53591939623663E-05	39303.8672699849	1.67591199503101E-05	26696.5618371089	8.42243749191721E-05	121419.509803922	0.70808825742958	48.5217650566488	104.122242098986	777.868217054264	0.6708
189.2564	206.6632	217.984	3.79466191379417	3.94605698894479	5.17630601877439	0.168918336300696	0.386181476206688	0.444444726159616	2.02506585998627	2.13606022656111	1.88552755032613	3.84761557133963	3.83387742990397	4.05491094029587	18	19	23	0.0344166597251145	0.519591836734694	0.0680988597329751	5.2726090259187	0.029944843583692	0.769132653061224	0.0699166505916068	5.47362665054848	0.0372221574344024	0.490612244897959	0.0696027268188764	5.17628642602094	0.0288084532319503	0.798833819241982	0.0688665618125565	5.49650067525159	0.533463624791777	4.22122302158273	88.1402877697842	318.61690647482	0.4448	2.40887751468467E-05	41162.0134892086	1.28476718966626E-05	21962.5325354454	0.000102209111602125	172870.863309353	0.586313021216538	56.0096153846154	105.241758241758	479.346153846154	0.5824
238.9408	209.0036	215.7392	11.8834210293164	15.0997081773126	19.6511573033244	-0.225107759010044	-0.458823143081428	-0.423563370115976	1.74056085121472	2.14958476377599	2.13471643164226	5.13596789654769	5.66317969654786	6.02208113571436	40	58	74	0.0107921699291962	2.20122448979592	0.0146599881051949	7.18532423902107	0.0071888449257254	6.38520408163265	0.0140735385410649	7.82274880128395	0.00947072053311121	4.57224489795919	0.0142566266939599	7.55686100824046	0.00739782691544773	6.41566014160766	0.0140568927017277	7.81598868302251	0.7596338986665	1.43180428134557	63.0721712538226	873.6874617737	0.654	2.08636949298373E-05	47744.5914373089	1.59043769788187E-05	36131.3477732192	2.99702879047521E-05	68323.355351682	0.830311252616556	38.1311004784689	74.5004784688995	1360.43827751196	0.836
217.0108	208.7768	216.9836	8.91404977325121	7.28064432313514	9.62248050348765	1.02388233250215	-0.85944232826664	-1.04286727896958	3.50434731686846	3.19317901134235	3.4435995390302	4.88503599837967	4.72487122020754	5.02210923878675	47	36	44	0.0273209496043315	1.02897959183674	0.0630484076226602	5.81353852108742	0.0215838886575038	1.75212585034014	0.061809064241468	6.13096710803281	0.0267085381091212	1.19102040816327	0.063392330152483	5.87763882170318	0.0211707221116566	2.01957517700958	0.0615153096444264	6.20052869537097	0.661269587883523	2.25481798715203	101.726623840114	574.137758743754	0.5604	2.21533596962938E-05	44790.2933618844	1.47244261945589E-05	29473.9437042392	4.91839497682649E-05	102490.679514632	0.712191927628677	44.6787506971556	125.593418851088	843.188510875627	0.7172
200.822	210.1604	221.5012	10.9083049095632	7.74345348278144	9.66873303799417	1.5802657362971	-3.03489011742001	-3.3036310936469	4.87522759896882	14.3080611584176	15.5078126374145	4.89162698998683	4.20110139239728	4.37464111458034	54	57	66	0.0262403998334027	1.18816326530612	0.042633905665837	5.95513737871255	0.0218554045767967	1.73809523809524	0.0463109219304611	6.16088808985831	0.0260877967513536	1.14857142857143	0.0419289926346461	5.93647968075823	0.0204008776712327	2.18742190753852	0.0423182604240781	6.29200921112386	0.61254747512359	2.86024844720497	81.2251552795031	462.636645962733	0.5152	2.28062674582729E-05	43556.2934782609	1.39791093224327E-05	26683.0728431334	6.51925368199459E-05	124443.86568323	0.667668381805195	48.7908101571947	101.272067714631	685.607013301088	0.6616
218.5784	208.7772	219.1228	14.0437549622599	11.4918910610917	14.9375406329154	0.299949885345554	-1.21612930437933	-1.22601785420769	2.06153134284443	3.77402907336889	3.88175201945979	5.5613552168434	5.06904893567165	5.39891246364565	56	51	68	0.022087130362349	1.0469387755102	0.0363719643824144	6.12726078749509	0.0156058384238049	2.85969387755102	0.0355537385259162	6.70763201818237	0.0188141607663473	2.25795918367347	0.035061081666502	6.52827406641096	0.0156031405073653	2.94960433152853	0.0348737696976329	6.74253174711116	0.663833170849924	2.09713487071978	91.0111809923131	595.491963661775	0.5724	2.20187346468907E-05	45098.890985325	1.46749075561548E-05	29816.3259234143	4.5264053587927E-05	96472.1551362683	0.752760859560619	42.7554725040043	109.636412172985	985.0683395622	0.7492
250.5896	143.4592	130.85	3.38826974132816	8.43693874340688	10.9605611170232	-0.704586944579066	1.74056458131666	1.60837655664206	2.64124333644487	5.85408747301149	5.02104259355119	3.57313059955761	4.58856366642181	4.89673546382145	16	53	64	0.0281899208663056	1.11918367346939	0.0288275726013741	6.11243939911485	0.019458038317368	5.58588435374149	0.0277673793895764	6.7594405976506	0.022568596418159	4.7730612244898	0.0277166758139185	6.58133651587122	0.0189940641489619	5.43940024989588	0.0276201718152612	6.76734301482546	0.651289613019848	3.66408068269977	80.8634600465477	509.806826997673	0.5156	3.24467921697103E-05	30631.7152831652	2.09722843152851E-05	20115.0280630177	0.000121803682590344	109172.009309542	0.744671705724708	43.3950216450216	108.307359307359	950.479437229437	0.7392
242.0668	207.3704	212.5524	9.04229715061389	14.6611460616147	18.978810664528	-0.0288181586355713	-0.595703171910592	-0.587332914052881	1.74248717058673	2.14705759276539	2.15492869293637	4.79158635080884	5.59052221424335	5.965361631116	34	55	71	0.00926913785922532	2.81183673469388	0.0137056211920156	7.30818683681178	0.00629439701050488	6.55909863945579	0.0132119671109665	7.82096830375145	0.00877800916284881	4.11224489795918	0.0134772161921216	7.42517913092771	0.00672720532764271	6.48229904206581	0.0132431947060785	7.78963741285608	0.76825268024123	1.12788632326821	70.7856719952635	923.934280639432	0.6756	2.08619440122741E-05	47766.1675547661	1.6013634908548E-05	36712.830533531	2.36452366909426E-05	53720.1793960924	0.838736765357335	36.4355432780847	84.7255985267035	1442.74309392265	0.8688
250.416	169.3256	162.36	6.48072094754897	17.767081489091	22.0267836962186	-1.63922382429977	0.866770219537662	0.771024100041603	4.86965512112697	2.48058139831294	2.30959267303426	3.50569436273557	5.63896340118098	5.93221611874257	30	67	80	0.0140967930029155	5.01061224489797	0.00745279709118235	7.45643408702981	0.0122916088203987	4.61734693877551	0.00746774536777547	7.52845442510443	0.0144699708454811	3.9334693877551	0.00761269580375826	7.3041985635168	0.0111072350979677	12.5177009579342	0.00729896173826591	7.79625649655993	0.774192936811791	2.32437619961612	44.6570697376839	871.277671145234	0.6252	2.60181045889276E-05	38559.5316698656	1.97407961775081E-05	30438.7479989196	6.75294450627731E-05	79551.3166986564	0.752521099624924	44.064039408867	53.3940886699507	961.128078817734	0.7308
253.6048	149.016	136.0324	1.67708585349707	9.67138790453573	11.8621815126898	-2.34734736592202	3.22883418973086	2.87921691560407	9.94474110517687	16.2265199707483	13.4931200442548	2.23608005440531	4.40159174851439	4.84501534278724	12	77	89	0.0396681382757188	3.32081632653061	0.0200326552526142	5.71081800319418	0.0317811010458601	7.00977891156462	0.0186863595618624	6.00817270313301	0.0369912536443152	3.88204081632653	0.0198762392013712	5.79707776685403	0.0315780197790006	6.88629737609329	0.0190244440902336	6.02857655608896	0.619634309829615	6.00881834215168	68.9329805996473	406.825396825397	0.4536	3.04975507393888E-05	32733.2495590829	1.84932221565847E-05	20791.1290232162	0.000188376377829821	189690.409171076	0.650420757775842	53.9722955145119	94.9248021108179	594.408970976253	0.6064
252.6784	146.256	134.2156	3.19170384591052	6.07934733339032	5.93945423755416	-1.43481053379815	-0.35036010111184	0.110173672058158	3.6162940588621	3.5126514647696	3.87216559006894	2.61789654982521	4.44924022561827	4.52965158879853	12	39	42	0.033131195335277	1.09142857142857	0.0392003759956117	5.83833720817234	0.0279748166273313	1.7155612244898	0.0387150824475398	6.05369434829892	0.0335127030403999	0.918367346938776	0.0392158111802654	5.76544356248022	0.0272590502256713	1.77384423157018	0.0385785472617339	6.12692490952986	0.628736038000704	5.55231560891938	68.3670668953688	431.164665523156	0.4664	3.20932652590136E-05	30928.8036020583	2.02897262577488E-05	19344.1716651348	0.000172590343786635	176890.414236707	0.660705599778023	51.7771428571429	89.8152380952381	638.75873015873	0.63
194.5108	203.952	211.4836	16.3972767055996	11.902003864896	14.0867643921519	0.113426170606875	-1.04344334645412	-0.936965358296503	2.31701747952727	3.94872565741679	3.59348020657247	5.83783358664238	5.35814144537763	5.61571899179618	78	65	75	0.0101067888379842	1.86081632653062	0.00623233859839682	7.20190155133499	0.00727308355314915	4.63562925170068	0.00629377202500143	7.62949420264967	0.00929212827988338	2.08938775510204	0.00645291629982944	7.25822395695795	0.00791961422432448	2.73094543940025	0.00638454183171162	7.45478179662387	0.661581284304287	2.9344262295082	35.9239940387481	547.454545454546	0.5368	2.49613887197227E-05	40480.6847988078	1.67861845746593E-05	26440.4279010826	7.07017519243347E-05	121915.647540984	0.761686357853132	40.7185261003071	52.3920163766633	1053.32446264074	0.7816
200.7472	198.3812	205.9392	9.20361299490586	4.30644709244175	5.34538149807851	-0.141752722226358	-0.709681346328988	-1.13830243466735	2.47582658523861	4.42284666693408	5.0559231253609	5.16398871253978	4.06899472071231	4.31096240526544	47	28	36	0.025628654727197	0.81265306122449	0.0677418805883131	5.73297519372616	0.0208611718496923	1.48341836734694	0.0700110982200236	6.05797954860398	0.0254453977509371	1.01510204081633	0.0691063968646979	5.81089009479616	0.0204643664195867	1.58392336526447	0.068133489149757	6.11092396888042	0.64695936689317	2.28190338860851	104.3741888969	550.005046863735	0.5548	2.477203370002E-05	40025.8579668349	1.6008018737399E-05	25924.8650471728	5.66798442672028E-05	91079.5342465753	0.683348788319199	47.2617370892019	118.402582159624	739.75117370892	0.6816
251.0928	145.6144	131.7292	3.98047587104859	14.384662409664	17.6201891976221	-2.32564844920762	2.9617677199916	2.7099855602503	9.18099481779002	12.4457240154023	10.9337989970889	3.35798929123008	4.88496226809776	5.29259596335934	27	92	107	0.0220394835485211	7.49265306122449	0.0098156777827775	6.53342864962402	0.0167103405988248	9.06887755102039	0.00947727026078036	6.90305460455646	0.0196501457725944	4.02448979591836	0.00995508922730519	6.6328822105349	0.0163108839316395	13.3286130778842	0.00939887169828695	6.93908426331388	0.710046980344697	2.68428372739917	79.1265646731572	670.815020862309	0.5752	3.16639890310062E-05	31716.7649513213	2.20493032205381E-05	23038.2030926857	8.95532323036918E-05	79699.3734353268	0.754970042388566	42.9582217461168	102.23835029459	988.559721478307	0.7468
249.0416	162.9216	152.752	2.4723813298114	8.15413106590764	9.33852750705378	-0.392654808088835	2.18158563714853	2.27534993923153	2.78667002730636	8.11565967822698	8.43728487545288	3.30229462045672	4.30241195823679	4.39402506059155	15	47	53	0.0468864639733446	0.846122448979593	0.0287069714614974	5.42216800587496	0.0398643938868062	1.59098639455782	0.0291077322595516	5.63152526102511	0.0489842565597669	1.10857142857143	0.028905731021001	5.3659792534149	0.0393187900154751	1.75177009579342	0.0286360093142017	5.63951327380214	0.564208430923098	4.88672566371681	88.070796460177	350.401769911504	0.452	2.77663241992366E-05	35819.0752212389	1.53914696001346E-05	20593.6218725032	0.000141005004770888	167752.240707965	0.624829969685266	54.3612774451098	110.543579507651	548.639387890885	0.6012
254.112	146.7668	133.3228	1.05993207329527	4.92897735438093	6.3653593896967	-2.00580460573822	0.550454308676348	0.248733423084482	8.47292316789781	3.15848630225262	2.50460978738418	1.76005135721784	4.1427407705528	4.57172424940827	7	32	37	0.0422107455226989	0.41061224489796	0.0705360316512527	5.04650625159133	0.0349601149983802	0.647108843537415	0.0728912798267899	5.28472188890216	0.0401236151603499	0.476734693877551	0.0730676982661089	5.07166099976736	0.0338559821926204	0.658059142024157	0.0725870656630006	5.27874649568678	0.426913521666625	8.71655328798186	68.1972789115646	187.383219954649	0.3528	3.14672255201897E-05	31490.298185941	1.33939989063055E-05	13492.6903143415	0.000273066844315307	275558.078231293	0.508380594513757	64.8712715855573	90.0125588697017	333.120879120879	0.5096
254.2296	145.0728	131.0004	0.784910084022368	4.4281260325334	6.06554200710868	-1.28143111213746	0.56071713893637	0.478898094078857	5.85166354376655	2.43999852536489	2.25812605739928	1.53874470982091	4.01612277381853	4.4520150646168	5	23	31	0.043363931695127	0.486122448979592	0.0872654970166273	5.03299295305767	0.0361459634874358	0.777210884353742	0.0905348454067388	5.27425484416111	0.0421197834235736	0.547755102040817	0.0890480230226629	5.03954074533634	0.0350622684113467	0.786339025406081	0.0889794760606624	5.28580176625727	0.462927629801891	8.02062975027144	85.6970684039088	212.418023887079	0.3684	3.19505183527368E-05	30987.8903365907	1.4781405331713E-05	14352.5281370969	0.000254859872349345	249947.935939197	0.549200425798393	60.3333333333333	108.261380323054	402.124816446402	0.5448
250.4032	169.3212	162.6368	8.69495427015002	18.9120816030388	24.3346848296829	-2.48294259450904	0.988714628762709	0.93367354687744	8.58978273877462	2.51859940056378	2.41073572789308	3.20676854498212	5.19250847030585	5.6265513196612	42	70	89	0.0351197001249481	1.54938775510205	0.0070185904671081	6.44121402255493	0.0279563781294834	5.35246598639455	0.00690412810804219	6.88778144357853	0.0342707205331115	4.60775510204082	0.00695472774264247	6.67291978862667	0.0291494884211961	6.34443981674302	0.0069190995653508	6.92571704172861	0.646237780333931	4.27095199349064	48.66639544345	476.912123677787	0.4916	2.58839672438012E-05	38862.5272579333	1.62201120778728E-05	25886.5427039803	0.000122045799881422	148779.158665582	0.74837395172039	45.4533183352081	68.5140607424072	926.026996625422	0.7112
239.5832	169.7332	160.3984	12.900847947325	11.8084214762177	15.2179787567206	-1.69951850682166	1.5053455487637	1.69418872656109	5.03003221057524	4.56687467264531	5.17487851759528	4.98059934444843	4.996374369644	5.1843068892011	57	54	71	0.0243498542274052	1.1734693877551	0.0285324638728901	6.12311288200508	0.0185762442732196	2.12329931972789	0.0281533062425644	6.50975561365742	0.0235848396501457	1.49428571428572	0.0282032565483393	6.2598925441832	0.0187893736488042	2.54102457309454	0.0284474142595151	6.53636683625312	0.651741885836721	2.72185430463576	76.9896983075791	542.955849889625	0.5436	2.73372914118559E-05	36350.4238410596	1.76477436125575E-05	23924.9102454395	7.69114093454811E-05	95526.7409860191	0.724600554784603	44.2333149476007	101.065085493657	882.073359073359	0.7252
243.4012	189.1264	189.9496	12.1719118695462	21.6941656451683	29.6782186096133	-0.42321814221346	0.0879903287484633	0.0562678886583471	1.62545532900001	1.26693365172854	1.23489724737798	3.99612718552075	5.44265196699084	5.71337328493757	38	63	85	0.0182064139941691	1.08979591836735	0.0061635336428448	6.58566688600891	0.0123729551344347	4.47959183673469	0.00604113738570014	7.1724345516553	0.0141924198250729	3.66734693877551	0.00607467877338541	7.02323946732225	0.0123006847938029	4.35318617242816	0.00604939438718002	7.21416939743011	0.639590745526298	3.21423106350421	50.0742157612854	502.879112471308	0.5228	2.32832718818513E-05	43125.7490436113	1.46878724027835E-05	27923.6005214176	7.9838836284672E-05	130118.692425402	0.804273561806947	40.1177944862155	75.0922305764411	1210.25714285714	0.798
190.0352	206.298	217.5684	3.04098026300731	3.49118833636915	3.6269713867082	-0.0834867805232764	-0.284999380029834	-0.216861509303425	2.19415760884285	2.61448723969201	3.03195727610092	3.59725903235268	3.76806723737189	3.83001363308923	15	19	22	0.0293840899625156	0.952244897959184	0.0910531186901438	5.52276976575768	0.0232390149937526	1.54421768707483	0.0881763633687167	5.82869991705461	0.0306988754685548	0.708979591836735	0.0926705859025074	5.38497853737632	0.023283197459895	1.28654727197001	0.089533932341117	5.78306467443177	0.617101758042995	2.57424242424242	111.487878787879	482.336363636364	0.528	2.41381468368244E-05	41065.1992424242	1.49188015697636E-05	25302.2913343006	6.22134627966872E-05	105564.518939394	0.678310788389615	47.2596944770858	135.048178613396	728.977673325499	0.6808
228.3756	211.2376	219.6228	9.08405881971269	8.7403630496679	10.9136116918278	0.244112357459723	-0.763708778187526	-0.740095085695598	1.86478696427414	2.70722738333064	2.56911784526877	5.00481437884977	4.92008330548719	5.1991362630184	42	41	50	0.024695710120783	0.940816326530612	0.0501508202685763	5.91455082185501	0.0179178814382896	2.48639455782313	0.0474934028612337	6.45569503334856	0.0207180341524365	2.04285714285714	0.0481614543416703	6.30079732459922	0.0160409700178723	2.89004581424406	0.0471032869277382	6.60524024042056	0.674428236105009	2.44492131616595	95.0886981402003	591.467811158798	0.5592	2.11164164761858E-05	47003.6452074392	1.4303463879607E-05	31563.2117904503	5.09135162608789E-05	116509.974964235	0.750334956739584	42.5228480340064	118.719447396387	983.757704569607	0.7528
254.544	153.4648	140.8004	0.580399862164008	3.79609812307322	4.0315455894731	-0.901979352619212	0.694837166899176	0.216622852814016	3.08450137973851	3.41054151341966	2.4153504684586	1.18131985661487	3.82328083003528	4.00714549883827	3	20	20	0.0528016659725115	0.542040816326531	0.138811928764653	4.83190970435143	0.043219477416817	0.772959183673469	0.137298323766231	5.06311455123993	0.0541241149521033	0.461632653061225	0.13909273496114	4.77846750500369	0.0425924502857948	0.820907955018742	0.13632193441659	5.12630003888767	0.533223644524543	6.90448343079922	106.808966861598	291.575048732943	0.4104	2.96713250822495E-05	33367.9844054581	1.57615587518991E-05	17861.5796691663	0.000207379544530118	227497.15497076	0.590537604113865	57.3529411764706	136.724089635854	471.09943977591	0.5712
194.9388	212.7164	225.632	3.99918173630557	3.60032929605057	4.02330411477929	0.130358538726324	-0.427789085400045	-0.720332451073402	2.98374883408801	2.90735689068015	3.29664340682597	3.90136138744001	3.81874432767758	3.91437742548581	22	20	21	0.0340748021657643	0.557551020408163	0.0778466285412129	5.35218936111724	0.0293146808042945	0.858843537414966	0.0791984741799838	5.57830808109699	0.0368673052894627	0.556326530612245	0.0802030421704622	5.2680095104484	0.0287578010064875	0.894627238650562	0.0793505618975294	5.61027558768234	0.550622682235207	4.17277486910995	90.6265270506108	346.83595113438	0.4584	2.27206926806894E-05	43644.7556719023	1.24901447802296E-05	24071.8169162539	9.45668247167993E-05	182593.979930192	0.615775588257633	55.009414929388	105.068594485541	529.852723604573	0.5948
230.6956	207.4552	213.0184	19.7962961343783	12.5430456014478	18.0447128389454	-0.117115198059349	-0.699315737176652	-0.513730569258125	1.36406254357546	2.31785302177911	1.87857552668787	5.33741091271858	5.18727074261943	5.46741403872356	55	51	64	0.0236411495210329	1.48693877551021	0.0387743707507223	6.27631971399607	0.018260982113934	3.02083333333333	0.0377853860321121	6.68648178555661	0.0210245730945439	2.0934693877551	0.0378950372642603	6.45773574080113	0.0174328654189451	3.35568513119533	0.0369747656528682	6.75150319539018	0.710460843150329	2.18034993270525	91.699865410498	695.080753701211	0.5944	2.15466094681557E-05	46099.7792732167	1.5349522991447E-05	32670.352180138	4.64178949284135E-05	101586.342530283	0.755098833248716	43.110693175712	112.081139172488	985.537345513165	0.7444
237.1284	153.376	143.8764	11.3366270751048	27.7420443370708	33.5168901158804	-1.31746060866775	1.32600631407818	1.28905583312967	3.81027721510012	3.29306297289703	3.20465092085872	5.00549860338027	5.73128503024267	6.01612786698635	49	96	115	0.00964164931278639	10.2689795918367	0.00334476506925925	7.66161639169999	0.00702542921930687	10.2397959183673	0.0032987063851917	8.00894846203712	0.00814927113702624	5.55346938775511	0.0032818521863432	7.79137689583509	0.00648886232152687	20.5035401915868	0.00328971127521247	8.16016332533022	0.744287402174605	1.61519146264909	43.9981167608286	816.912115505336	0.6372	3.13919963103124E-05	32647.9560577527	2.28089763701693E-05	24889.0552423807	5.4896841966607E-05	48201.2981795355	0.795461368296972	39.192118226601	59.2266009852217	1199.56748768473	0.812
195.2512	204.8872	213.1192	11.7523826758662	10.3479889911035	13.0167657795629	0.133522415222189	-1.64518230250827	-1.62766947054845	5.42898835376988	6.01917199792968	5.61180135484406	5.20200928742476	4.99482115722229	5.27815955584212	77	55	64	0.0157367763431903	1.46285714285715	0.0116326745492012	6.67385549626392	0.0102243278263686	3.15518707482993	0.0123006946653704	7.21373807321781	0.0117277800916285	2.91387755102041	0.0119039215445062	7.00465360214008	0.01017433212352	4.81549354435652	0.0118964132894716	7.1862315579038	0.664688691242421	2.53979739507959	61.7062228654124	570.486251808973	0.5528	2.45182355499073E-05	40838.7286541245	1.64985216346649E-05	26855.6232391567	6.03042827362388E-05	106519.923299566	0.774097113592057	40.7750511247444	84.8231083844581	1090.76175869121	0.7824
244.3628	136.9432	122.5564	2.39899482283727	6.13905316478038	7.9256809827295	-0.522479618842458	1.24811046317564	0.711657333908822	3.90553292867653	4.9427837117406	3.6228720175925	3.25535131775952	4.44181621333497	4.83713292947772	19	39	46	0.0268511453561015	1.81183673469388	0.048425757681218	5.98272116088048	0.0204808326391783	3.57270408163265	0.0474411626603717	6.29701522965618	0.0259498542274052	1.93673469387755	0.050305416108306	5.95369290094027	0.0207238723418206	3.23698458975427	0.0482031568902179	6.29663480109799	0.670397094509252	2.66885485047411	98.016776075857	572.757840991977	0.5484	3.50236333690908E-05	28309.2545587163	2.32960913508484E-05	19137.6148566639	9.58684753341679E-05	73509.3420860686	0.73408236926811	43.9408543263965	124.265060240964	911.886089813801	0.7304
199.5392	199.69	209.1572	6.76245986013965	8.30553429948971	9.08821699564882	0.665379172294131	-0.888538698908501	-0.985047675355297	3.06782845225502	3.81823950113474	4.25057543885756	4.67373185769855	4.96779460933331	5.08680568356156	36	47	55	0.0165271137026239	1.82163265306123	0.0371867263295168	6.54983204649471	0.0125645708963857	3.81632653061225	0.0371704045549363	6.95132546742128	0.0163095376926281	1.93591836734694	0.0392177575353936	6.51510139873375	0.0130583865774378	2.91670137442732	0.0380757742016557	6.81277368157489	0.720154114981588	2.09741550695825	84.2100728959576	724.593108018555	0.6036	2.47523559084645E-05	40116.2816434725	1.79156605676287E-05	28749.6183419952	5.13106548035991E-05	85036.2047713718	0.788529876722393	39.7518721917124	106.99700449326	1161.76185721418	0.8012
246.61	171.9568	162.8372	12.0969210958822	18.8785945917592	23.6457077745624	-1.85692409852262	1.18184884217728	1.37493169675004	5.48754718135107	3.94513470916334	4.4044367799984	4.30231425921655	5.91325763360987	6.09969323375297	52	87	106	0.00740324864639734	4.14408163265306	0.0080342430077381	7.77289451377353	0.00581933453653578	7.4719387755102	0.00792516165210885	8.14089972608835	0.00777342773844232	4.01918367346939	0.0078923706477172	7.72047223873043	0.00609752183986927	7.96793002915453	0.00792787722292593	8.06276309866821	0.819875404922782	1.06984478935698	53.2516629711752	1132.66407982262	0.7216	2.64219287157575E-05	37917.3786031042	2.15023972560487E-05	31307.4542673154	3.02800737014259E-05	37809.9223946785	0.815686485185463	38.266859344894	58.1868978805395	1297.42389210019	0.8304
194.6876	205.9264	214.178	12.2087675971	12.8015695537696	15.6572256801772	-0.410344523032536	-0.39105011826219	-0.478481858573252	2.2555690694346	1.84723713686903	2.12328247977023	5.39990411972068	5.32525179842238	5.59794486178039	55	52	64	0.00773311120366514	2.65795918367347	0.00746540326122723	7.53186024166443	0.00579185755935029	6.81802721088435	0.00744514203476702	8.04266126833022	0.00864806330695544	4.07224489795918	0.00761593112215797	7.5808796780899	0.00621756067555497	5.94418992086631	0.00751636825821257	7.91636187742064	0.751749290246635	1.37507711289328	51.2282541640962	847.899444787168	0.6484	2.40560850357096E-05	41680.6909315238	1.80355555655399E-05	31399.3621487613	3.36574873083798E-05	56350.0950030845	0.829926523029632	37.8011417697431	60.0304471931494	1367.75261655566	0.8408
214.8628	199.0032	204.7244	15.20576128183	18.0498196600409	23.4504849553266	0.522503925141589	-0.898286806794593	-0.929352463137744	2.04719180537673	2.44284798100474	2.45309462720241	5.64044817925031	5.59725922929625	5.86438625462458	59	68	83	0.0101104539775094	6.41020408163266	0.0110026706195262	7.60782301636271	0.00847483976583829	8.99999999999999	0.0110520047514421	7.82766164004744	0.0114685547688463	2.48204081632653	0.011030041326282	7.25954348705304	0.00817669161520059	7.8633902540608	0.0109768370599202	7.79296268774831	0.800725768864219	1.04097894137735	63.3414911781446	1048.75184974388	0.7028	2.41789745431535E-05	41339.7558338076	1.95320953253936E-05	32810.4481716864	2.38708883610435E-05	45185.6101309049	0.789421689313909	39.9849548645938	71.2637913741224	1159.67301905717	0.7976
238.3904	166.3628	162.3368	13.4895658877519	25.6749834695176	32.6794027754486	-1.48005252541795	1.04500589714907	1.08707208236231	4.01872750307777	2.48317357255023	2.53737465056193	4.96741779407907	5.58716999736194	5.75244131265352	54	80	100	0.0128706372344857	4.32163265306122	0.00430935848287804	7.26286771947369	0.0110085062936738	6.6139455782313	0.00433704524076378	7.43294695748829	0.0149940857975844	2.67959183673469	0.00429470262172651	7.00093871651484	0.0110361138224892	6.53227821740942	0.00429582709698178	7.43603674333244	0.755817968406583	1.3363802559415	54.1176112126752	867.994515539305	0.6564	2.81959301695929E-05	35958.6447288239	2.10451212789124E-05	27499.9180668751	4.03154795648211E-05	44657.2644728824	0.754996436962845	42.6707511987214	64.3116675546084	993.385721896644	0.7508
237.9804	165.9188	163.034	12.7012446571192	20.5713831951087	26.7672494664655	-0.996418017363904	1.12148375203464	1.04842865284399	3.28490836177768	3.23303334134668	3.07893721148871	5.38929866446429	5.84696104618711	6.29488788092165	60	83	106	0.00805264473136197	10.2212244897959	0.00638855175712008	8.09993964299255	0.0065604898421955	15.0982142857142	0.00657172640384456	8.33011268791089	0.00872769679300295	5.16163265306123	0.00642905201852404	7.85374655904419	0.00713589246185605	14.597667638484	0.006348579690916	8.23979934823424	0.844978494430652	1.02904787520172	51.5013448090371	1248.58364712211	0.7436	2.798765315909E-05	35941.7283485745	2.33279423369446E-05	30773.1947916011	3.18090353172478E-05	33177.8391608392	0.840956296676362	37.5082508250825	62.033474776049	1422.67845355964	0.8484
220.0012	169.4336	173.112	19.08703220933	22.1043885018337	30.9160970369806	-0.732393129749733	0.0605868786715536	0.0295681873987137	2.50113995568405	1.51560802113385	1.49211112467049	5.82661653292533	6.00148623854984	6.36670755016078	77	74	96	0.00502957101207832	7.57061224489797	0.00667012498000727	8.2518983689698	0.00398850016196953	12.6641156462585	0.00649032641477685	8.57370271956232	0.00606014160766348	4.82448979591838	0.00663730828113537	8.00684420791541	0.00442565146654674	11.295710120783	0.00653241070601139	8.43322846844977	0.854060495088855	0.555442003065917	51.3290751149719	1343.45375574859	0.7828	2.9012253040973E-05	34642.1972406745	2.46057041758913E-05	29763.8549770056	1.68911709760405E-05	18414.4256515074	0.83779055587131	36.6373728029602	56.8168362627197	1432.84736355227	0.8648
222.404	120.3664	108.8096	15.2163590914515	20.0470484371141	25.5260445004705	-0.354379204435502	1.68201598935589	1.89336628367404	2.05606596533823	5.53279382164647	5.76764785261326	5.45562044595577	5.53949977133057	5.70448573122084	70	105	127	0.0128736359850063	6.00530612244899	0.00550243316668382	7.59802510995989	0.00971961914017288	16.1143707482993	0.00548006468918763	7.96807988669056	0.0120866305705956	6.03959183673469	0.00546727143757179	7.60357272353752	0.0100150898530581	6.44897959183674	0.00548222113981645	7.7809053956287	0.770932819149408	2.06675143038779	43.0864589955499	868.922441195169	0.6292	4.41836325210252E-05	23137.930705658	3.35005226692232E-05	18188.2368422714	9.57074024169408E-05	44692.5518118245	0.810129599368178	39.9585207396302	58.5472263868066	1235.68565717141	0.8004
184.2172	195.9252	206.6	8.89568570487964	7.84058702904317	8.12812401480194	-1.13442195033282	-1.1298611288086	-0.989615614401685	4.19407200703775	4.93132423320651	4.58816584915647	4.83569155242278	4.83498413038344	4.91254050705079	52	54	53	0.0138362349021241	2.90693877551021	0.0177145217870576	6.95345321196086	0.010398589707992	4.90561224489796	0.0174848343438631	7.33158585338166	0.0150084131611828	1.79387755102041	0.0183302901177655	6.81125415408365	0.0114833105253763	3.79383590170762	0.0178390573006935	7.21539759726111	0.769710852802814	1.35860409145608	76.6450060168472	912.56678700361	0.6648	2.67626074683783E-05	37251.4951865223	2.07199883618562E-05	28526.8364594052	3.50882594475655E-05	52194.6203369434	0.79708278893836	39.1003443187408	93.8607968519429	1206.84062961141	0.8132
184.7828	199.2152	207.5588	11.7898101833745	10.3177172359006	10.7754602017733	0.711011472919636	0.549812027816782	0.723699440809824	2.44955214203512	2.27307972751907	2.4417836394701	5.29496328412195	5.19339957228725	5.16936948618439	51	45	48	0.00874069137859227	1.59020408163266	0.00912667823246232	7.2888671710369	0.00605505807765286	3.64455782312925	0.00898604539251958	7.81332100575721	0.00830553935860058	1.9265306122449	0.0092290232059767	7.38182356724618	0.0070630365211219	2.70137442732195	0.0091117986737149	7.59767298078185	0.731771851478173	1.53214513049013	47.6429026098027	778.46530872056	0.6284	2.59386636029352E-05	38593.8491406747	1.89125238227952E-05	28349.7691636581	4.00307523472865E-05	58592.6028007638	0.826816407278702	37.3124705882353	61.5487058823529	1367.38776470588	0.85
183.1528	172.2368	179.6712	10.9856566558399	23.0565896385393	29.0012946359296	0.741859160465391	-1.52946631370693	-1.4972524822945	2.83343963619836	4.09346490565481	4.07729985180118	5.27011759367316	5.66039886953932	6.01910138467393	51	90	114	0.00924581424406498	3.0330612244898	0.00470926370463128	7.46989618521677	0.00597696561617845	11.4153911564626	0.00475405148994373	8.09411611358834	0.0072396501457726	8.95224489795917	0.0048628683546524	7.8857610703109	0.00596291181603668	11.6268221574345	0.00478102147189387	8.1194190724748	0.761146160124217	1.12016656751933	56.7739440809042	902.129089827484	0.6724	3.26579553945582E-05	31188.6847114813	2.4879529330344E-05	23683.5734519704	3.58267674448594E-05	35584.0838786437	0.83885745277039	36.3305785123967	72.5766758494031	1446.28282828283	0.8712
214.0424	207.9436	212.2312	14.2745578649568	17.6427100820707	22.3864277311053	1.39294532971869	-1.69633931379366	-1.72952446490967	3.7926055349409	4.63614012131479	4.72124828077873	5.05668157278779	5.11369847127589	5.33522352037722	57	74	90	0.0180804664723032	2.37755102040816	0.0120070146280122	6.68407616253675	0.0151304144106622	3.85841836734694	0.0118410701259884	6.94543302152822	0.0206627238650562	1.84571428571429	0.0118227025608213	6.51123253033411	0.0158775645507971	3.92503123698458	0.011989985497299	6.93299444271311	0.734923988959616	1.65006385696041	80.3243933588761	782.97190293742	0.6264	2.26632814696458E-05	44082.6494252874	1.67205256861231E-05	32275.4253610529	3.6846830998658E-05	73662.7745849298	0.731799678238922	43.8135593220339	90.9825041006014	907.816839803171	0.7316
184.0596	193.0792	202.7672	7.28296971296737	9.41947595994597	10.9123876470734	1.62393368097244	-1.91546630160777	-2.18251043878946	6.54128552784978	7.14300556496711	8.34539908537629	4.53005024007123	4.76887896744584	4.8900575180595	49	63	71	0.0192609745939192	1.49061224489796	0.0290551262752138	6.39173793700372	0.0135956806191864	3.58758503401361	0.0312747852059872	6.8251038756227	0.0174950437317784	2.21755102040816	0.0308507736465118	6.48832673970922	0.0155167541776377	3.09246147438567	0.0308554670908388	6.67804901050978	0.699779313253189	2.07808219178082	78.7328767123288	662.280821917808	0.584	2.72921105803872E-05	36422.5301369863	1.9229190517486E-05	25325.82947463	5.5404873930686E-05	77331.398630137	0.762194010516671	41.3419689119171	100.561658031088	1041.66113989637	0.772
202.6548	211.338	219.484	7.62168202957851	5.69200808151218	7.23509115353774	0.296287785586949	-0.562623911760919	-1.01022291277559	2.06982592511519	4.58215554676997	3.48692657473551	4.81751252129786	4.44746327758671	4.60768753097277	40	37	38	0.0243768429820908	1.17877551020408	0.0513523081948076	6.04662293273344	0.0164807632236568	3.12797619047619	0.0496738072046534	6.65504270803897	0.0196338192419825	2.17224489795918	0.0490494823206152	6.43198639136623	0.0177201259852682	2.76176593086214	0.048988320771241	6.57213842104172	0.655971146856119	2.41424418604651	95.4607558139535	554.529069767442	0.5504	2.26144550762515E-05	43884.6453488372	1.4879708823222E-05	28704.6286141503	5.4480379182529E-05	106122.253633721	0.766301867982684	41.9973780807551	122.221814368117	1041.33455689565	0.7628
192.356	168.0424	173.198	11.0881406917481	14.7237971406835	17.7704810289424	0.220335201084487	-0.161504459286554	-0.319938731560766	2.64724004500214	2.61301695649364	2.62006711033821	5.39940210442655	5.86909996178762	6.10768076600218	59	73	87	0.00450878800499793	6.02040816326531	0.0107125056457131	8.24355497670163	0.00364901487806005	12.7045068027211	0.0104235455477678	8.55648303777071	0.00539042065805915	4.9595918367347	0.0108871560844324	8.04054813781761	0.00392190467632795	8.11578508954603	0.0107232502425525	8.41800645505816	0.855094281784358	0.506559031281534	61.6528758829465	1361.79011099899	0.7928	3.24149566535554E-05	30844.9323915237	2.7821656901254E-05	26269.7195168228	1.58655656387025E-05	16190.9071644803	0.859364895871294	35.1433021806854	65.8998664886515	1576.67245215843	0.8988
231.0804	191.1444	189.9804	20.437405310851	25.6751309371539	33.5203820956743	-0.136241274357628	-0.029678240253021	-0.0199063033857445	1.32275398028226	1.27167966116953	1.24309300547224	5.24935920746628	5.74598968314345	6.00665005556478	61	75	95	0.00932644731361933	3.04244897959184	0.00562498534392583	7.45270573001871	0.00808256976259895	5.08758503401361	0.00552362713721784	7.65889268258931	0.0113699291961683	1.92734693877551	0.00558068906266857	7.1786679463527	0.00821381345166988	4.29529362765514	0.00555571742356595	7.65889115072537	0.761451357588025	1.38650306748466	49.3484662576687	876.152147239264	0.652	2.42073811708898E-05	41555.8423312883	1.8335264876469E-05	31773.8534263456	3.44093301851381E-05	56417.5447852761	0.774508466895352	40.9856115107914	57.8828365878726	1086.84892086331	0.7784
199.9692	192.1596	202.4952	11.4779550164653	14.2134488369291	18.013605329306	0.588880354470582	-1.15618381719335	-1.23542839805761	2.62323175900431	3.55742086766854	3.70180544742172	5.41735465069827	5.47596033891585	5.74211522902429	57	65	83	0.00957301124531445	2.78857142857143	0.0144386341957116	7.3368716796561	0.00704676003054284	6.12712585034014	0.0144838736223801	7.78919204589658	0.00914119117034569	3.36938775510204	0.0143440874267886	7.41706254894611	0.00760147661645216	5.30737192836319	0.0143638628996979	7.65563130102498	0.772902271085426	1.15103244837758	59.540412979351	938.535103244838	0.678	2.62572425031678E-05	38016.2501474926	2.04660273457062E-05	29152.903889424	2.93553210044765E-05	44859.3492625369	0.810187277439556	38.1867179980751	72.8123195380173	1278.15399422522	0.8312
181.3932	189.234	197.054	6.90363627083583	9.18838636540715	9.35075847191018	-0.729496234865483	-0.603065583688844	-0.625091156178597	3.97536124086649	4.21519249752011	3.84254732769158	4.75092964163859	5.13646783413114	5.1594264684502	47	59	55	0.0103746772178259	2.88408163265306	0.0148102260973938	7.32330623279377	0.00770150747373781	7.04039115646259	0.0143158213676072	7.74590410391642	0.00951137026239068	4.3265306122449	0.0145378562234344	7.43215687134099	0.00790434917007543	6.57809246147438	0.0143066207087255	7.72912286076292	0.783377998428662	1.23135642982971	64.6688197298884	970.21902524956	0.6812	2.85935358626956E-05	34902.7492660012	2.25913621693104E-05	27124.485037477	3.33441558912784E-05	45174.0816206694	0.813942855036922	38.2277323062109	79.1280693307655	1291.63264323544	0.8308
222.3864	181.842	182.608	16.3327491574444	20.943797076939	26.0540349274349	-0.00620559412213912	-0.241146343865643	-0.269299680862652	1.74956993330423	1.57046703195486	1.58129583330442	5.80286287503515	5.96550949150609	6.28583759698609	59	82	99	0.00539775093710953	7.5922448979592	0.00708484887573605	8.25586466465716	0.00384207679670507	14.1079931972789	0.00693241639494957	8.6427337139291	0.00515585172844648	5.0326530612245	0.00713513328004654	8.21482087109868	0.00412798290869017	10.1187005414411	0.00700518234693103	8.53749044866994	0.830172491284165	0.799785867237687	48.9453961456103	1203.92933618844	0.7472	2.66683367973661E-05	37648.1937901499	2.21629695841894E-05	31205.7921944974	2.08267943451938E-05	30853.9539614561	0.832317864967955	37.12734082397	56.6938202247191	1395.56554307116	0.8544
237.3684	151.4668	141.8188	10.7211511247627	24.1907771218702	32.0282932195895	-0.818868909313081	0.978349463036564	0.833995252463397	2.86826175754687	3.12088116232567	2.73394208000368	5.13607355289076	6.08016729883527	6.47067221614368	49	103	130	0.0123005414410662	2.54857142857142	0.00449838659731671	7.5062855065013	0.00950414179277133	9.04931972789114	0.00463141650817268	7.97064688702159	0.0109854227405248	6.03061224489797	0.00465404529450249	7.74053710452658	0.00944542578312754	7.12494793835902	0.00466282130348322	7.90639096912499	0.73470229559615	2.28021248339973	36.2762284196547	752.130146082337	0.6024	3.13414929231445E-05	32393.3067729084	2.24287370669943E-05	24393.4899751363	8.08659775558048E-05	64505.46812749	0.818673089282118	38.8985365853659	50.289756097561	1294.04682926829	0.82
226.532	173.7464	176.4056	11.5835476431014	22.9557244939035	29.442640653311	-0.354758008732633	-0.125758787727796	-0.273211935770679	2.26608835825221	1.76002751981945	1.88720297397528	5.39251819045852	6.28684940958294	6.59927321211858	49	86	106	0.00300974593919202	14.7065306122449	0.0045532087786711	8.98834347490521	0.00250365877643576	33.4583333333332	0.00431518602613416	9.32819206098934	0.00362882132444817	9.45224489795917	0.00457821917581436	8.74570165486884	0.00306116377651197	13.9396084964598	0.00456017521053027	8.93702327815297	0.902257482969694	0.395172740179839	44.1888310459063	1644.74538570752	0.8452	2.75841404191667E-05	36646.8196876479	2.46723164886686E-05	33292.5124085675	1.2128124204165E-05	13115.7548509229	0.880516385217727	34.4237140366173	47.7210113339146	1707.18308631212	0.9176
230.578	157.4612	150.556	15.187887147329	25.9245307490801	32.692734116314	-0.633658544691593	0.244273731285585	0.13380332777498	2.22591760519678	1.56361654372153	1.51832740515259	5.5241531636697	6.10692656641176	6.50025231018591	58	88	106	0.0075301957517701	6.95183673469388	0.0040770884298431	8.06993664502895	0.00478677865704119	27.8133503401359	0.00391052086902131	8.81307634953937	0.0056789670970429	16.3236734693877	0.00399712879364285	8.55460486886047	0.00552230684112084	17.4402332361516	0.0039912444425153	8.58763189675812	0.781449659168034	1.35502958579882	39.6615384615385	957.738461538462	0.676	3.10099695519337E-05	32804.8710059172	2.38777363727473E-05	25976.4209829922	4.63310806501913E-05	40183.0970414201	0.881782469579725	34.2664930555556	56.0164930555556	1718.50694444444	0.9216
216.4612	182.174	188.75	9.94752705751535	16.6036780262688	20.4718025586415	-0.0450070628239118	-0.801487230855623	-0.780471287277822	2.59724213506112	2.82987665908346	2.81756979607436	5.30289406251802	5.84503062484172	6.15002030802747	50	82	97	0.00403931695127031	10.4024489795918	0.0086186795518108	8.55455352134311	0.00323324482854365	19.1011904761904	0.00823980741511965	8.89381803861102	0.00498958767180342	6.69551020408165	0.00878790750317921	8.30969341867642	0.00383308981524254	13.539775093711	0.0084951814272949	8.63874703289761	0.902376474399283	0.298786181139122	66.8580765639589	1663.55182072829	0.8568	2.68601842495254E-05	37292.7366946779	2.42692771054398E-05	33596.7740779672	7.70557403648875E-06	11596.2511671335	0.883205033457995	33.9603789836348	70.2644272179156	1736.85443583118	0.9288
243.8736	162.3284	154.8272	10.7467959429776	19.858473089339	25.8417131815985	-1.08395805752401	1.24880294351213	1.18331389911125	3.2540989056007	3.55347660105339	3.33714623466626	4.84544166685601	5.60673606560185	6.00928703351806	44	79	101	0.016329196168263	6.32448979591837	0.00715076188864146	7.32059156633828	0.0138834658012863	8.95323129251698	0.00719569911642418	7.55762781851359	0.0167690129112868	3.40734693877551	0.00702538673801541	7.16571989134075	0.014040900978195	9.44897959183674	0.00697036619629274	7.55434764910239	0.803121111165199	1.25561312607945	60.6280944156592	1043.92918825561	0.6948	2.82974425804071E-05	35492.5924006908	2.23555304591289E-05	28965.2260334385	3.88817387759594E-05	40413.4691997697	0.793191446254658	40.5255955397871	71.2412569690826	1160.85301571211	0.7892
233.31	131.3476	119.0892	12.3564193842715	18.7680892538372	24.0460151243402	-2.60214672019241	2.50480582700495	2.31271735710192	9.86591879360408	9.32375145757433	7.59228520616831	4.42831246642026	5.1607744019785	5.40190087988952	75	123	125	0.0202049146189084	5.16897959183674	0.0067449291518317	6.75740656656603	0.015759131033366	15.2789115646258	0.00693234417048546	7.11047450418798	0.0197764264889626	9.53551020408163	0.00635137658991444	6.82576298768911	0.0164975339131393	11.4064972927947	0.0065661445259834	7.04403634311641	0.700040276780864	2.66407904022583	61.9484827099506	642.666901905434	0.5668	3.78927870605134E-05	26797.8496824277	2.59120409602649E-05	19315.7325962966	0.000108251199749243	64992.5088214538	0.739323466332555	43.4490238611714	80.1529284164859	934.533622559653	0.7376
209.8276	185.9288	190.2016	15.9337214184258	20.8927291314467	26.3021549961215	0.363299169196015	-1.09318647055863	-1.17253089040119	2.30354708119714	3.12701309363811	3.29452829225017	5.87552666701294	5.90972546228705	6.09661158040275	66	90	108	0.00783840066638901	5.86040816326532	0.00691168263162355	7.9318274803081	0.00514723321301311	14.0642006802721	0.00711306391505303	8.42556838775911	0.00596618075801749	9.12163265306121	0.00699705077722346	8.22668647147646	0.00545604262835787	14.1595168679717	0.00700942573701277	8.38531765955197	0.783515272332883	1.15393586005831	47.9795918367347	977.02915451895	0.686	2.69581307752642E-05	37340.2530612245	2.12487949462529E-05	29096.9723202117	3.03262380060586E-05	44180.7795918367	0.849846236665916	36.0838650865998	61.9489516864175	1502.74020054695	0.8776
216.9988	181.4544	182.5856	15.5503182784148	20.7896108823614	26.0882094563809	0.0546301951668696	-0.396515278749408	-0.449303932190264	1.66584549865626	1.70327978983009	1.73030254639538	5.69135629400186	5.93421759030339	6.21107493589512	60	82	101	0.00747455226988754	4.06204081632653	0.0075577992200093	7.8300872171455	0.00518049481697443	8.85969387755101	0.00746359030406707	8.31490870076462	0.00654560599750104	4.99551020408164	0.00762402039756646	8.02563228939479	0.00536132990540351	8.39566847147023	0.00751988225027326	8.30422771713529	0.791308354055108	1.04335424985739	50.0496292070736	1019.5213918996	0.7012	2.72183257001867E-05	36857.5544780377	2.15915692963943E-05	29072.7609892775	2.75883059953144E-05	39640.9161437536	0.827462723723458	37.7813688212928	60.3545627376426	1357.88403041825	0.8416
231.7264	119.6292	104.6916	7.37717717287582	5.51170639276078	5.83976792689573	-1.90521043572768	-0.326555458422564	0.876199507334579	6.69441105291724	4.95049409719763	4.83862311128311	4.36289500388391	4.32606476957844	4.43521832765161	45	42	45	0.0266299042065805	1.46979591836735	0.0340684244686583	6.00914992350294	0.0225058135499099	2.95408163265306	0.0335015749078739	6.23521780133962	0.0267865056226572	1.83714285714286	0.0339479529682158	6.00681289384923	0.0216602446467796	2.89004581424406	0.0334654247692564	6.30507308532819	0.613226549499151	3.44212218649518	74.1109324758842	442.663987138264	0.4976	4.32783670617831E-05	22951.8520900322	2.65674364186994E-05	14075.8198792113	0.000147925994067327	79283.3215434084	0.653549087583125	49.3889908256881	92.5412844036697	654.524159021407	0.654
195.0484	157.3	161.532	9.7667833722265	34.284637959296	39.1025136787905	0.226989895581552	-0.099808876071706	-0.153259252346812	2.79245711729431	1.67172524119185	1.71132023024561	5.28128526879208	6.72554685610503	6.94081045394747	57	123	140	0.00229904206580593	22.8220408163266	0.00176228096065721	9.49220649356959	0.00193568073487899	44.0093537414962	0.00174712029321935	9.74892120532001	0.00246130778842151	19.089387755102	0.00179374842786423	9.39031119463922	0.00199781397484493	36.8329862557268	0.00176066481566828	9.65866703286292	0.885071494690666	0.420950533462658	27.5392822502425	1534.30940834142	0.8248	3.68637024364164E-05	28921.6682832202	3.26780307544237E-05	25480.1237149032	1.48163738600285E-05	12960.4190106693	0.881938912507601	34.5679930039353	32.9903804110188	1709.60778312199	0.9148
188.72	202.9752	215.216	4.43161370157643	4.29541441074083	4.23742185768658	0.964877051325869	-0.550521892996393	-0.417861023844614	4.85227191806725	4.45622691223415	3.91517938175384	4.08512952669304	4.03828921361723	4.0663176714188	31	40	39	0.035091045397751	1.12816326530612	0.0903388679717616	5.37587189269847	0.0269191222407331	1.82993197278912	0.0874496373483088	5.73627156369182	0.0347781757601	0.929795918367347	0.0880963715326423	5.41755599314334	0.0295432574342115	1.67763431903373	0.0871195706331873	5.63042818698906	0.600937424560749	2.97643362136685	117.766692851532	444.406127258445	0.5092	2.47476551446915E-05	40054.8515318146	1.4860789054685E-05	24091.9509590975	7.35606439656205E-05	119346.604084839	0.667730787066657	48.439039039039	145.49009009009	691.40960960961	0.666
170.016	186.0332	197.0508	3.47478689994077	4.29791784007093	4.95308180429114	0.032330699311909	0.254089261481724	0.0865927569484804	2.67654125588126	2.72458499563135	2.43020576721267	3.80892375238067	4.089028082126	4.31012599491357	21	24	28	0.022001166180758	0.925714285714286	0.0621524494624419	5.90958936532183	0.0168130177240965	1.72066326530612	0.0624362851976717	6.29513644519855	0.0222490628904623	0.990612244897959	0.0628249876804781	5.92808111382038	0.0174574976655742	1.57434402332362	0.0619282830625725	6.2416901746751	0.670878810827254	1.95423023578363	101.900138696255	607.457697642164	0.5768	2.97512815773209E-05	33309.854368932	1.99478180467854E-05	22360.939645293	5.81590392874773E-05	65064.6872399445	0.745654019225542	43.0806451612903	121.739784946237	959.215053763441	0.744
237.8852	138.486	127.6416	4.9861428940615	14.7693264572221	16.9756870093673	-0.48570828347468	2.69483272667588	2.32731587101453	7.56996137289763	12.8817583541825	10.6852848612239	4.07061985352925	5.31340061853839	5.61695915200994	40	108	118	0.0131545189504373	6.73836734693878	0.00781116219785907	7.10398935495588	0.00926877979082772	22.5148809523809	0.00713631090338442	7.60034171754643	0.0114935443565182	11.4236734693877	0.00765664807945146	7.2831830264372	0.00965636107820536	13.1857559350271	0.00754533202680073	7.49836860584161	0.766863398528629	1.50030432136336	69.1412051125989	895.338405356056	0.6572	3.5129326854077E-05	28676.8800973828	2.65047174451127E-05	22415.7433442794	5.61847897085333E-05	39702.8478393183	0.801642042805233	38.920666013712	87.026444662096	1227.85308521058	0.8168
216.1696	192.918	198.9336	12.2668347930507	19.0096416589056	23.6701244407375	0.533469745506503	-0.727309132484445	-0.549630671972713	2.28333436909508	2.70855003845186	2.36499271653148	5.38224085567904	6.01326787624051	6.28870942872137	52	80	95	0.00667655143690129	3.13836734693878	0.00761798685891322	7.85394788058657	0.00442560102272202	11.7108843537415	0.00722553684814828	8.54831076814522	0.00586988754685548	6.38653061224491	0.00749747859999109	8.15590288061903	0.00529055556297607	6.5551853394419	0.00746753277423138	8.2597838548443	0.793081854005318	0.968217934165721	47.7003405221339	1029.48694665153	0.7048	2.50516128934217E-05	40048.4449489217	1.99708026860966E-05	31591.9177632387	2.35781667217489E-05	39837.4778660613	0.85422657038071	35.8943310657596	59.6467120181406	1528.94557823129	0.882
199.9812	210.8256	221.28	9.67620000620078	9.4810539836033	12.2199181666654	2.40541739369319	-2.90280061186934	-3.12793146808595	8.99980695316891	11.9843443531899	13.0150650364786	4.42613293261809	4.22427997560033	4.27636674955794	61	62	78	0.0358104123281966	1.05918367346939	0.0442718489532972	5.60623575938429	0.0306635834605951	1.60459183673469	0.0513543221846832	5.77281966170048	0.0402812161599334	1.11714285714286	0.0441233115085995	5.4766357819908	0.0319787274530378	1.98958767180342	0.0460952482632507	5.77281824435797	0.64151156753531	2.47870778267254	115.932452276065	531.124816446402	0.5448	2.29129906229039E-05	43351.8957415565	1.47963364571564E-05	27646.4895845596	5.58692804292422E-05	109071.78928047	0.666261146595868	48.0872162485066	137.550776583035	693.587813620072	0.6696
241.8324	143.9892	130.6204	7.8748911255966	19.6837466799388	25.0849178559548	-0.847560831771539	0.775768577172288	0.693500696556974	2.57517386753956	2.35455801924401	2.18908915816173	4.61923142994177	5.68554391974737	6.054574578086	33	78	93	0.0154492294877135	2.81306122448979	0.0063502842097252	7.23004440188952	0.0116383075338977	7.97406462585033	0.00611417784348557	7.72928233308791	0.0138752186588921	5.18897959183674	0.0062491830481695	7.47391929284125	0.0116623279797515	7.39775093710954	0.00619986984083223	7.67777355811874	0.729020187372574	2.16310160427807	41.1470588235294	735.31550802139	0.5984	3.27252681665349E-05	30827.6871657754	2.317075146729E-05	23106.8157940451	7.96541167969741E-05	58629.314171123	0.788541482065967	40.1363865123301	58.1333668847509	1153.02415702063	0.7948
190.7532	161.1144	166.1668	9.85094359744284	36.1089090480452	41.6335607144044	0.301067805739201	-0.381820237565946	-0.393393183412785	2.42217965612269	1.54401323835502	1.60236582251764	5.24080477884356	6.44299382332861	6.70081804324	60	113	132	0.00458642232403167	17.0897959183673	0.00168714798416671	8.81673729274595	0.00340316824008513	30.2784863945577	0.00168775115533526	9.16877221534351	0.00431553519366931	17.5355102040816	0.00167916027784961	8.8950974713241	0.00349899328701893	36.6693044564765	0.0016597498212494	9.12831037100807	0.855711324027653	0.644215938303342	31.8308483290488	1342.36041131105	0.778	3.69999037238373E-05	28976.6195372751	3.20225366243378E-05	24418.5434515427	2.08586714525223E-05	21328.7676092545	0.849303180019223	36.6387990762125	39.084064665127	1484.66928406467	0.866
202.9684	192.0932	196.6448	11.4908398927145	19.5021361332547	23.1732827402593	-0.647813059996414	-1.05802133435785	-0.848789531048448	4.06199472470524	3.48418191045925	3.09881512918935	5.41058857916151	5.91925744210501	6.32630257694563	68	101	118	0.00855410245730946	6.11061224489797	0.0049870673344608	7.91795542723066	0.00503009452080153	17.5034013605442	0.00492551881453365	8.65575152583958	0.00659425239483549	11.1469387755102	0.0050131015935715	8.39109631230284	0.00577938423199691	15.8488129945856	0.00495665502322243	8.49002912557877	0.79134144566039	1.12869565217391	46.9478260869565	1004.1431884058	0.69	2.671075591227E-05	37955.6144927536	2.14157764744848E-05	29664.2989375776	2.83831078289016E-05	45140.3304347826	0.861295976488465	35.8484848484849	59.8095884215287	1564.22749886929	0.8844
206.494	196.494	201.9104	17.7184977918558	15.9020113193269	21.4050081018438	1.11950397886961	-1.11601248196749	-0.991424187578173	3.16768769425773	3.28355991546951	3.12696865524692	5.59219526248875	5.55262633554567	6.00976832524171	69	65	88	0.0114788837984173	2.00979591836735	0.018386751194171	6.99164144808645	0.0093696492202323	4.24192176870748	0.0192283323074681	7.35650361585426	0.0120802998750521	2.11020408163265	0.0179808908845141	7.00588017461781	0.00968376878924355	3.27446897126197	0.018420715947115	7.24928864802241	0.739176916176949	1.32549504950495	65.2314356435644	817.649752475248	0.6464	2.50017531957623E-05	39836.0550742574	1.85908086043363E-05	29275.1399743758	3.24416595206465E-05	53855.9121287129	0.778138724462205	40.4979674796748	75.8841463414634	1109.63211382114	0.7872
224.1512	116.754	102.7548	9.06171830063151	10.3891811034364	12.9259536189791	-1.79559947902147	2.36412405643967	2.08245306695073	7.06443081075784	9.34420801125521	7.87305871125601	4.76591235837623	4.61852086938087	5.0858045505004	60	66	80	0.0180971261974175	3.87102040816326	0.0147500455978588	6.67443487825684	0.013756927090564	10.735119047619	0.013661717979911	7.16220674214934	0.0173760932944604	4.51551020408163	0.0146624834525523	6.81867574833174	0.0142684890597263	5.26988754685548	0.0144281711802295	7.00246182479605	0.734251543202972	2.12997347480106	67.1644562334217	751.917771883289	0.6032	4.48000670733118E-05	22337.4860742706	3.22393054944049E-05	16769.6883837545	0.000101796139096614	44073.3057029178	0.749413495472233	43.0430107526882	83.1430107526882	969.356989247312	0.744
244.6968	146.3552	134.6212	6.08349157638934	16.2193043303343	21.617328941384	-1.18215305172647	1.21943328538518	1.11054007432802	3.91709426209626	3.7606292597105	3.55729697498754	4.23286539855488	5.52757247450187	5.97263013809338	30	76	100	0.0153129529362766	2.45591836734694	0.00891767146229743	6.98243461389477	0.0117406231199961	9.3222789115646	0.00867824263754534	7.53065193281747	0.0143216992919617	6.54448979591838	0.00869687505355966	7.26328012052697	0.0114666577389227	7.76593086214078	0.00864016333020669	7.48824845094761	0.671759466569147	2.31863442389758	51.9928876244666	591.756756756757	0.5624	3.22414527465047E-05	31135.0284495021	2.12884375003337E-05	21302.526736316	7.86319642146353E-05	68212.6870554765	0.79658745239744	40.0150451354062	67.5025075225677	1184.07321965898	0.7976
220.2272	171.8964	174.0668	16.5785518113013	19.6499177362146	26.329298087112	-0.437337836011556	0.151499049364157	0.12217765208545	1.98333457389955	1.85277146404413	1.8191475084761	5.76993621638784	6.05128975427445	6.44465625184794	67	73	93	0.00438117451062058	8.32122448979591	0.00831050673063645	8.37603902275165	0.00354525313526767	14.2895408163265	0.00807213603810141	8.70692541875567	0.00553669304456477	4.41591836734694	0.0084421936703307	8.0426412792392	0.0040280661899691	9.90045814244066	0.00824455898636558	8.48720072341667	0.872755980600512	0.418342324668955	57.329573320255	1467.04315841099	0.8156	2.85667084443962E-05	35051.7969592938	2.48433222144996E-05	30676.6904879843	1.23228386822328E-05	14321.1441883276	0.862703833096762	35.0719360568384	61.7229129662522	1594.93872113677	0.9008
215.0896	186.5016	194.3008	15.411345555791	26.996866437422	34.1039458033818	0.0665524429539522	-0.559725722693583	-0.618770302281002	2.1646460629656	1.81750858395292	1.88277293855605	5.75735826266563	6.14090842944744	6.41216129156653	66	87	105	0.0063210329029571	4.53632653061225	0.00392929704319694	8.03302795935363	0.00396427703734558	14.3771258503401	0.00378675148495107	8.63321370012165	0.00474502290712202	7.49428571428572	0.00388578674790078	8.33214349602753	0.00437569310718617	8.6793002915452	0.00384347999476751	8.47853940030624	0.810824327336747	1.00674536256324	41.2585722315908	1091.24732996065	0.7116	2.64624944899367E-05	38338.3299606521	2.15465878892523E-05	30904.5670839025	2.61905584121504E-05	39692.5553681844	0.874697807453124	34.6133274879439	55.8680403331872	1670.72380534853	0.9124
238.5188	163.726	161.0552	13.5489647781666	23.3812686567688	32.7266886953141	-0.818328536422012	0.544657767161639	0.502722227456383	2.45336278596283	1.76538720317763	1.7273440583653	5.25322759474689	5.81112154450536	6.30146924642125	54	82	108	0.0113652644731362	2.9665306122449	0.00522669593471766	7.59215316670735	0.00954788803276394	9.3205782312925	0.00514738437233867	8.01874317944135	0.0108234902124115	5.63714285714286	0.00520640500090985	7.76478166950869	0.00922616409482298	6.85464389837568	0.00518582088219992	7.91148060474433	0.788311969083088	1.64624624624625	47.2642642642643	962.591591591592	0.666	2.84099605839444E-05	35540.8246246246	2.21058093252586E-05	28356.463195657	5.22063987386486E-05	52037.0636636637	0.80650377947991	39.0706921944035	58.5022091310751	1242.13696612666	0.8148
236.6672	144.812	137.0928	5.63116721115614	16.3852084515272	19.9970644885693	-0.36056780824173	0.752689908085025	0.523421128513931	3.7681196521961	3.06031088118414	2.68455767370092	4.47674176990685	5.8473663849291	6.20696330635022	42	91	103	0.00565997501041232	10.2779591836734	0.00724659795507716	8.23024078479824	0.0035864686010458	26.1033163265305	0.00689257751233517	8.83452504942647	0.00471137026239068	12.7163265306122	0.00734154112441716	8.44454432871176	0.00428340891558966	17.6743023740108	0.00716757982404728	8.55500251833105	0.830609766927498	0.840259039395575	49.9444144630329	1197.2460874258	0.7412	3.35427650972636E-05	29979.0804101457	2.75942434892885E-05	25139.8534155222	3.06380738308263E-05	23042.5240151106	0.885388187007612	34.2048505846687	63.1732351667388	1740.18319618883	0.9236
241.3284	133.9564	120.5156	5.10346484655278	9.96124987338436	13.0586123550705	-3.79451876198323	1.28019523247979	1.12899265161492	21.3935061036556	4.28876585765043	3.85832554134962	3.5175893597286	4.93771978694911	5.31465893885147	48	62	80	0.018943440233236	3.95469387755102	0.0198019076414364	6.67536801318746	0.0137280039566846	7.80612244897959	0.0194862934863742	7.19267569234692	0.0169929196168262	4.3065306122449	0.0195173012321884	6.8743727300541	0.0152648807825283	7.25447730112453	0.0191743711398817	7.03948242049242	0.703346444272091	1.95716198125837	69.7456492637215	687.705488621151	0.5976	3.60664294933593E-05	27609.7536813922	2.49777525990424E-05	19728.0094907493	7.42429958586994E-05	51124.3192771084	0.789187834564638	39.7946026986507	93.4257871064468	1162.83208395802	0.8004
233.46	175.3616	175.9452	12.0340018281534	20.4523750562129	26.7909051164756	-0.347190050048689	0.425939898446705	0.305380065232074	2.12791642636287	2.05526888614779	1.9581689734422	5.41200219621623	6.03251575464359	6.47551468180225	54	75	99	0.00578558933777593	6.22857142857143	0.00692174097713826	8.11704439404594	0.00411865426442686	11.7453231292517	0.00695565711569657	8.57970636282201	0.00582157434402333	5.95591836734694	0.00683175317795673	8.14095357962156	0.00471811602863656	11.5889212827989	0.00677597598546476	8.44981860168582	0.822023427348828	0.935271530444323	49.5386725178278	1150.88261108064	0.7292	2.68358305217173E-05	37401.9555677455	2.19785411361208E-05	30838.547903148	2.5176635698242E-05	34965.9281404279	0.852431999128938	35.7963800904977	59.2914027149321	1523.39547511312	0.884
233.1964	129.4876	117.9584	3.69748928869307	13.0136638284535	15.6085575707687	-0.726916186396383	1.10496339315953	0.963346566030083	5.76930379017136	3.98478138489203	3.67460895964262	3.7747838853782	5.41397655124299	5.7085627184818	34	75	89	0.011238983756768	3.01020408163265	0.0118140000689073	7.22151334090642	0.00747156855939663	12.6479591836734	0.011535502486756	7.93299592954036	0.00917884214910456	9.0681632653061	0.0112544977392815	7.67424470820851	0.00783184016239242	10.4306538942108	0.0113465748186016	7.81586305057013	0.754801975880325	1.62350722815839	55.1521055939661	839.452545568825	0.6364	3.86222687695469E-05	25916.4217473287	2.87587365415939E-05	19832.053626796	6.68106183536733E-05	39231.4443746072	0.833981244548996	37.2299389957766	73.3679023932426	1399.71328015016	0.8524
188.7724	200.4288	213.1568	8.30362560813046	14.604250427872	17.5766041589381	1.67798273873414	-3.2145052064723	-3.28876321511637	6.04421846382305	14.0612509428435	14.5292292176693	4.62823616148806	4.79981650661973	4.97603741794665	46	89	106	0.0193722615576843	5.85673469387756	0.0126610702234998	6.57157407086195	0.0149265063168124	8.00425170068028	0.015846739211305	6.86483803177383	0.0198164098292378	1.36571428571429	0.0116747896442092	6.45336324399246	0.0159549306211958	5.20783007080383	0.0128026901824752	6.75873239093478	0.71650079105318	2.05566733735748	73.7417840375587	708.228705566734	0.5964	2.58989404156083E-05	38782.8765928907	1.89246721968131E-05	27349.1187605421	5.03286291109118E-05	83277.928906774	0.764695322207374	41.678496868476	96.1555323590814	1041.62734864301	0.7664
234.8724	135.8984	125.9084	8.50722741203031	20.5344412497638	23.4489063591461	-1.80042163270719	2.58232112483826	2.50735747024214	5.1027836910934	8.66736752234178	8.31345014412042	4.00936652305958	4.58017877608871	4.83227670220562	45	95	108	0.0408346522282387	10.2775510204082	0.00650873211114922	6.03749228015043	0.0358711937155807	13.5977891156462	0.00788514864802966	6.17256521498972	0.0452404831320288	3.21469387755102	0.00596354519833961	5.85466376201478	0.0370019711001303	11.8917117867555	0.00642713432631045	6.11009659224273	0.736520923274137	1.85288399222294	118.131561892417	774.349319507453	0.6172	3.60815044663125E-05	28165.347375243	2.59052680046825E-05	21392.0853467143	7.22335908664123E-05	47010.5573558004	0.735744585866482	44.1755641166758	141.695652173913	911.436984039626	0.7268
237.1792	132.9516	122.3524	6.05493908805035	16.0406127513883	18.1061153823784	-1.06787524156302	1.98315578845909	1.72755257061915	4.67982801501488	7.66324444734022	6.30541739793554	4.37920458856172	5.34569746627308	5.64360724173907	44	104	109	0.0138885464389838	11.1485714285714	0.00772572116365791	7.40632921747319	0.0111730066176128	23.3941326530612	0.00741550019489401	7.72544747707563	0.0147995002082466	9.6534693877551	0.00764238139773191	7.33486314779499	0.0113698634176616	16.6455643481883	0.00748093751828635	7.65061435186251	0.83154118321898	0.856300268096515	79.8428954423593	1206.54101876676	0.746	3.69991912267592E-05	27198.4123324397	3.03643852975462E-05	22940.2004373949	3.43594202613702E-05	21148.5045576408	0.821260364841817	38.0076555023923	89.3454545454545	1326.21818181818	0.836
236.6344	138.718	128.9588	3.89100714982638	13.306542601292	15.3614681121304	-0.984410834251032	1.06422667895414	1.01968846663904	3.68852610170928	3.0557458361183	2.86367142871704	3.75047330509173	5.1701636195724	5.38358936335543	27	62	68	0.0173997501041231	4.66897959183674	0.0119654020056855	7.15441698187274	0.0123483704706371	10.3618197278911	0.0115844287118911	7.59716187501414	0.0163851728446479	3.46367346938775	0.0121766741558252	7.07258847095537	0.0152090245612988	4.89462723865056	0.0119716742440267	7.21804148431366	0.782209068576432	1.38365896980462	69.9177027827117	959.110124333925	0.6756	3.49710667213451E-05	28591.0526939017	2.69017146286955E-05	22739.0353412368	5.24748122150952E-05	36148.0402605092	0.815143062974166	38.5635305528613	93.2250242483026	1287.93695441319	0.8248
184.2212	149.5924	150.2676	13.4789714206982	11.7589056565652	14.8570787922795	0.359169980084132	-0.246544247765742	-0.46097729867561	2.44024796299887	2.87472122623598	3.07278047443204	5.64247402061349	5.52930711865263	5.82298641668381	62	61	76	0.00942340691378594	3.31102040816326	0.0228248346594089	7.33753403666598	0.00732080672405019	4.90901360544218	0.022333914930855	7.63805373706829	0.0114079133694294	1.91224489795919	0.0237838938030493	7.02665695189582	0.00790469610312653	4.76842982090795	0.0226646432635929	7.54902060449217	0.81968476114904	0.783432593394694	84.9945858148349	1157.65619924201	0.7388	3.87994856526347E-05	25629.0384407147	3.18253180839111E-05	20999.9909147855	3.02984581182112E-05	20096.9691391446	0.819665081047876	37.4298535663675	93.7350023618328	1335.18611242324	0.8468
231.8132	156.4212	151.5656	6.68699527142049	20.7067474645344	24.2899011245415	-0.309399436758205	0.333375357661701	0.260273495141681	2.17356427357888	1.91744016278637	1.89879976171393	4.63830296520044	6.10571474804344	6.39786946976106	36	85	101	0.00494460641399419	9.34857142857141	0.00518126726772486	8.46761018117149	0.00376109202184269	20.8618197278911	0.00510479170495414	8.90191945369713	0.00534410662224074	8.58244897959183	0.00527396562252841	8.43809438165575	0.00432608168087678	13.6247396917951	0.00519515266841142	8.6537293881637	0.872016166738599	0.630412890231621	45.4259818731118	1429.91440080564	0.7944	3.10343683409717E-05	32573.2688821752	2.67727711533672E-05	28692.3444052158	2.18830349291333E-05	18261.4874118832	0.855762769766078	35.4394618834081	51.2215246636771	1549.92914798206	0.892
203.0084	179.298	178.9408	11.8297730088113	20.0939691449947	22.8812695312126	0.235363925324898	-0.322802454643632	-0.28362498356775	1.79451752208162	1.77740704495727	1.73191154243539	5.34941035266194	5.86816194765753	6.06268242066801	45	75	83	0.00844214910453978	3.4865306122449	0.00747681996175837	7.69951864167188	0.00705616004905365	5.75637755102041	0.00752174904177803	7.95561523949324	0.00891428571428572	2.98163265306122	0.00760537271331398	7.54433582517116	0.00710640315251125	6.15326947105373	0.00750670661924002	7.94095341938499	0.783832163620986	1.11233352634627	49.9924724956572	984.716270990156	0.6908	2.93999631588685E-05	34153.0856977418	2.33520287990651E-05	26397.5196976219	2.98908244045051E-05	41451.9189345686	0.796330572848546	39.6849178695869	56.8317570930811	1190.9512195122	0.8036
209.4508	129.5856	120.6396	7.66516662310742	16.2648662041838	16.9756328848146	-0.476843210827057	1.44853330936638	1.60034565965351	2.42581616668781	4.57614075824754	5.18572179350214	4.84958728613589	5.56164379744749	5.57524488295918	36	78	83	0.0112323198667222	5.56979591836734	0.00960239915749818	7.46243700572334	0.00844989356286716	9.91326530612242	0.00920564357414769	7.85437824378106	0.0126470637234486	3.46653061224489	0.00971479494507223	7.25990943285395	0.00934308053304866	7.58309037900876	0.00941620542863239	7.70559351914888	0.824348251714693	0.811015118790497	78.8747300215983	1175.60799136069	0.7408	4.21876692001142E-05	23808.3644708423	3.4296928745537E-05	19921.0083526833	3.69481795158996E-05	17649.2667386609	0.824584973228783	37.3981132075472	89.2716981132075	1355.83679245283	0.848
209.486	160.5612	158.218	9.07608968664369	17.2516855570695	19.8249155357595	-0.59080554511288	0.162131996614232	0.143248936498891	3.55613241224262	2.97822996105056	2.97154332226238	5.05882117006384	5.889581043117	6.07114653173444	50	88	101	0.00612444814660559	5.3869387755102	0.00887207289307054	7.98989865771987	0.00462444756814294	11.9502551020408	0.00866788533131528	8.3942051010152	0.00665022907122033	5.46816326530613	0.00891908225573647	7.9298581267678	0.00516635353067698	8.82299042065807	0.0088181807664271	8.23240209048843	0.820852434382314	0.722729715206878	63.1590542718968	1169.75228371843	0.7444	3.26032494389113E-05	30732.6824288017	2.67071359577402E-05	25267.1460596856	2.34598328525691E-05	22446.634605051	0.843377782328598	36.3535353535354	69.5289256198347	1465.54545454545	0.8712
230.9568	139.6808	131.7344	6.54636798232425	14.1908037601822	16.915432499348	-1.50560079579444	1.34760262099812	1.25267102236421	5.37504025182818	4.54442915364622	4.40501311152522	4.35696772526945	5.15871797754946	5.46736463871366	41	78	94	0.0203605164514783	4.87102040816327	0.0118159489446754	6.96658192645028	0.0170617566754597	11.0778061224489	0.0117676757967131	7.34164933383228	0.02364947938359	4.6130612244898	0.0123039813607388	6.85827467934615	0.0185617855672727	7.02915451895044	0.0121866536481458	7.07723599311994	0.804223090678579	1.07579185520362	80.4841628959276	1064.75904977376	0.7072	3.53758976836919E-05	28268.770361991	2.80195372447017E-05	23086.5876336175	4.12878998620683E-05	27767.6826923077	0.797635922537907	40.0651955867603	89.8355065195587	1187.31795386158	0.7976
197.7184	169.092	167.8172	10.92395081644	46.5840953115975	50.8727410718156	-0.232073171411189	-0.74036676822706	-0.737584250399641	3.48785500545209	1.82946438354569	1.82764523292319	5.39028838585068	6.42699637918717	6.54107460999498	68	139	152	0.00409062890462308	19.2265306122449	0.00088804079749441	8.63700453272176	0.0029505211948725	23.9294217687074	0.000883512959560063	8.99971430145442	0.00469870887130363	1.89510204081633	0.000891867988906725	8.34849596145963	0.00374705041856606	17.8483965014577	0.000887169369060096	8.71477337886786	0.898510873671145	0.533754249635745	29.3351141330743	1593.41282175814	0.8236	3.80701128148961E-05	30944.0097134531	3.54583907887717E-05	26859.9415792456	1.32619807205319E-05	21624.2700339971	0.869847796191575	35.0026572187777	35.7085916740478	1633.53852967228	0.9032
238.6348	128.9472	115.9304	4.77332472811142	16.9150942107929	19.3655146030257	-1.0746242876106	2.38406957679639	2.13243580010232	4.95253483841538	8.75195469520785	7.26897160903478	3.92365905120428	4.97679882012591	5.16385021600942	34	106	111	0.0255836734693874	6.52122448979592	0.00715275800739065	6.44165064830875	0.0204797480216581	12.8869047619048	0.00707843059929833	6.71451357298847	0.0280546438983754	4.65020408163265	0.00748918129286448	6.30385400916561	0.0228148378408898	8.09620991253644	0.00729096039994968	6.58537005585128	0.679878785712762	2.21433591004919	74.671117357695	611.230498945889	0.5692	3.78143708612287E-05	26786.6493323963	2.49064245556738E-05	18903.7574007707	8.98861433355501E-05	54049.830639494	0.724172907942664	44.923937360179	96.0167785234899	868.23937360179	0.7152
237.4728	131.9056	121.772	3.26638334553677	10.4240054029149	11.6927676792109	-0.787806369997245	1.99713984902039	1.80662633862376	9.17958242513721	7.2806614696226	6.50253654444914	3.57939625773853	4.79279285294485	5.07434778239875	38	67	74	0.0247137026239064	5.06530612244898	0.0169492870745821	6.47875765432836	0.01798621234208	10.6781462585034	0.0161648991817222	6.91664555202938	0.0214060807996665	5.11510204081633	0.0166302516257403	6.65179616818236	0.0199474361734255	7.98917117867555	0.0163010998825136	6.73702697081769	0.753660635766585	1.93282149712092	85.084452975048	822.197696737044	0.6252	3.69963063460901E-05	26966.2648752399	2.74688987734924E-05	20652.7379027382	7.57395439237251E-05	48785.4849648113	0.776611448722301	41.9351464435146	107.054393305439	1075.18514644351	0.7648
202.3428	132.2524	126.288	23.1955790649856	32.7376953104521	35.7410164377008	-0.0792940160845711	0.469256308816777	0.506521103063874	1.50723528372333	1.87114227383561	1.89193279501417	6.06658020362388	6.62982548786697	6.75622297618795	91	124	137	0.00260891295293631	15.1583673469387	0.00215065662890069	9.13166922434903	0.00208825026609284	23.798894557823	0.00219510668542245	9.42553815041745	0.00314035818409	5.18163265306123	0.00215530561384791	8.86722143507597	0.00234544089206201	15.7188671386923	0.00214580764192109	9.26002386752589	0.927936738031519	0.176628010704728	29.6877787689563	1858.81801962533	0.8968	4.55801099802888E-05	23480.639161463	4.26634394177477E-05	21626.9119370106	6.98095777820826E-06	4602.67484388938	0.906471725524262	32.8656093489149	33.0308848080134	1908.78714524207	0.9584
198.83	160.6508	157.9312	15.0287823858089	49.0402942421841	52.8708621696299	-0.508626744927977	-0.382855149265401	-0.392966381167322	3.65146897582033	1.31391878988881	1.2927346858603	5.70802597310681	6.20744549871896	6.11602596396804	85	136	141	0.00535810079133693	28.7069387755102	0.000806097268501073	8.3183908863321	0.00402465407931882	34.7954931972787	0.000801350673128008	8.62725883587367	0.00557134527280299	2.60448979591837	0.000816164389888713	8.16068749357006	0.00436216271819269	27.6967930029154	0.000804589897790262	8.51761699846963	0.871231933100918	0.535928143712575	33.0189620758483	1438.83832335329	0.8016	4.07642706842337E-05	29327.2644710579	3.67886780473663E-05	24714.7281087662	1.53810247521595E-05	20002.7220558882	0.85566684428411	35.7488708220416	40.3224932249323	1540.13911472448	0.8856
213.4728	122.0348	112.3884	8.36825311280676	20.4688638903091	21.8081256746195	-0.951021480485012	1.07314156125733	1.08730397477767	2.97716234677674	3.60561826174846	3.78718064978686	4.77483956749695	6.05247280579705	6.18965879775667	39	96	103	0.00838717201166183	4.33755102040816	0.00630151063574679	7.75160315082851	0.00716751411448942	6.88988095238094	0.00635261718172321	8.00458571895927	0.00923515201999168	2.35265306122449	0.00621072553022139	7.56943460224134	0.00701481282701695	5.89129529362766	0.00619031127384356	7.96087537510967	0.847066022049712	0.627400103788272	46.6149455111572	1299.31344058121	0.7708	4.522197221262E-05	22494.5931499741	3.7939693303409E-05	19281.6077084061	2.99119374492074E-05	13077.0529320187	0.816716116035633	37.9727403156385	52.2118603538977	1309.16642754663	0.8364
239.652	118.0808	102.666	1.7807009855672	2.87065695616874	3.13484353676543	-0.163686153625666	0.413234513979786	0.4244428986072	3.05233412709389	2.73831482445526	2.95928609780608	2.86767773203782	3.5158078394901	3.64372824370493	12	17	20	0.050512286547272	0.663265306122449	0.197382512070831	4.78735107920758	0.0399811710398445	1.01573129251701	0.19049429537501	5.0602252094217	0.0532344856309871	0.59469387755102	0.20032428097014	4.70031955145702	0.0432766022625933	0.900041649312786	0.193686773627931	4.97478950597025	0.567693053897699	3.34818481848185	155.501650165017	389.887788778878	0.4848	4.22874760611521E-05	23360.3646864686	2.39670641795479E-05	13283.8552707062	0.000142760874553782	77560.800330033	0.638841487299101	50.7876884422111	186.552763819095	609.386934673367	0.6368
173.1936	107.5568	102.0576	6.98295918934086	9.92888582671792	11.5407747677528	-0.810603159721223	0.754259307710085	0.740947884488398	3.46822093382585	3.7382961528396	3.67632199039337	4.71559250911152	5.25018628325914	5.46351282014598	40	55	64	0.00850179092044982	3.07673469387755	0.0245253558888396	7.33658251005817	0.00654602827525571	5.72023809523809	0.0236790180414955	7.74316067165099	0.00933444398167432	2.28979591836735	0.0247318861579935	7.17784243482827	0.00719278948223885	4.19575177009579	0.0243203091267004	7.53836414779218	0.828903527608101	0.722488038277512	84.3258904837852	1207.54226475279	0.7524	6.15601563143584E-05	16151.4226475279	5.08264718607335E-05	13442.3198952197	4.57135497224213E-05	11319.9064327485	0.82677385960799	36.8705170004658	92.6702375407545	1379.66138798323	0.8588
233.4192	130.3008	119.8164	10.3880831417543	26.7669930952283	32.5729502968337	-1.28402820984659	1.74061725568028	1.59293263870775	3.58077811857616	4.66692042350285	4.21262395874237	4.73197562270909	4.8151229506306	5.48402116719552	46	109	131	0.0419871720116627	13.7922448979591	0.00328450161710154	6.53725142655816	0.0336300123791	21.4732142857142	0.00330077621832755	6.73536578795343	0.0395295293627663	9.42408163265304	0.00322414603475004	6.55186772525608	0.0327218580485268	24.3202832153269	0.00317706489668622	6.78373350705428	0.753028707202159	2.37086092715232	84.1880794701987	794.112582781457	0.604	3.77797474414299E-05	27514.9052980132	2.73800880489442E-05	21626.0836461343	0.000102186223007782	54472.4165562914	0.748003259928658	44.2361034672537	117.576774903687	944.185470555861	0.7268
209.7868	131.5124	125.8904	22.9595763410391	37.4498844623051	41.8833712568604	-0.449678825730756	0.802669720040274	0.822957578768342	1.99566269855423	2.20925542308375	2.16012814889166	6.09132387432207	6.58223041733754	6.55487170330958	96	131	137	0.00369579341940863	29.8730612244898	0.00147867093612243	8.93107406699881	0.00299788282659995	39.2551020408161	0.00151668940486124	9.20620244406992	0.00418592253227825	5.6595918367347	0.00148051071706039	8.74421188266653	0.00343203520815375	30.920449812578	0.001473280860024	9.0237933526499	0.919358098680872	0.257534246575342	27.3141552511416	1779.78082191781	0.876	4.53227329602489E-05	24308.1712328767	4.19416817899028E-05	22220.4693346017	1.11107370106265E-05	6387.51278538813	0.888575480552222	33.8972926514826	31.2165878813924	1768.87451654491	0.9308
235.0016	144.4572	136.5428	6.60333229816583	25.1579682836274	29.6704730019594	-1.51421369190437	1.77279696634003	1.72364229705807	5.11886608202464	5.18892325623376	5.05101375828264	4.29936833931573	5.7143914371637	5.98751734550403	41	108	125	0.0129502707205332	11.6424489795918	0.00341623885599855	7.61495950624509	0.00991918876394066	24.4200680272108	0.0033605246463285	8.01134152627615	0.0132364847980009	8.72408163265302	0.00353726276983284	7.59754029153818	0.0117431633806612	15.3865056226572	0.0034488826872513	7.71192231107273	0.814714120668603	1.19139297848245	59.5503963759909	1095.03510758777	0.7064	3.3767828497658E-05	30311.4694224236	2.69545941083563E-05	25208.2117818641	4.50064421532759E-05	31748.3289920725	0.806141109620606	39.0648011782032	70.0103092783505	1241.19636720668	0.8148
212.2284	154.766	152.0648	7.24697408854206	17.2489084872058	19.9483683783913	0.493317229450665	-0.666274525931368	-0.730714915145877	2.34266391504846	2.09658827512715	2.13602325720719	4.60864670654107	5.63679203869042	5.79160995650336	34	62	72	0.0066045814244065	5.17755102040817	0.00859676077359915	7.77022490570414	0.00554890323476331	8.61777210884353	0.00835307357569721	8.0365165665717	0.0083881715951687	2.70081632653061	0.008579289600622	7.44304776967631	0.00608850158054025	6.24198250728863	0.00850034738851494	7.90789465796406	0.834756658511357	0.737373737373737	66.1228070175439	1227.57947900053	0.7524	3.37950885609081E-05	29668.2599681021	2.81101586321068E-05	24822.610144771	2.55524156757737E-05	21497.543328017	0.834300749391015	36.8197026022305	72.0752788104089	1412.55576208178	0.8608
204.414	134.694	129.8916	22.6073307579643	34.077563938756	38.5338481005985	-0.233616283036455	0.598314980785542	0.653961917366825	1.69159704105356	2.08319928588747	2.12193895795554	6.15610380629759	6.73314023823444	6.83696669044592	94	130	148	0.00252794668887968	20.2526530612245	0.00179287502416536	9.28882561202347	0.00209150411865428	33.1866496598638	0.00185797620709546	9.50875351705274	0.00309471053727618	6.43469387755103	0.00178479655483261	8.93916963406404	0.00246894905825891	18.8346522282382	0.00179545941826771	9.3187800237195	0.918076541288694	0.285254937988057	26.4515388148829	1764.59853008728	0.8708	4.45747783217686E-05	24310.231511254	4.12349037591885E-05	22193.4784326321	1.10093546350537E-05	7712.51538814883	0.900897846396954	33.1067675493905	30.6906263135771	1866.94115174443	0.9516
229.8496	141.7228	136.2284	5.98576476651063	20.0480712329142	21.7950506638549	-0.156649278832597	-0.100265941850349	-0.25260864953705	3.04867508346613	2.14007824836653	2.24693850059902	4.58579342369967	6.20738693867213	6.33928643014256	39	90	100	0.00265689296126616	13.58	0.00483132332553833	8.93209014141577	0.00201377319635338	25.221088435374	0.00491595524625344	9.3130595981691	0.00282115785089548	9.50897959183672	0.00477764010492716	8.83121417111007	0.0023287881056085	19.4885464389837	0.00475778456719006	9.14356756795082	0.916213762626262	0.213636363636364	44.0727272727273	1770.01	0.88	3.59412776443444E-05	28326.9022727273	3.28866699979055E-05	25987.4462940657	8.04587566704454E-06	5762.14590909091	0.904200739932676	32.7767596834652	48.7151187005414	1898.21532694711	0.9604
228.0504	165.9036	161.2	5.55797263757209	15.3658292011853	16.7627444053771	-0.590819921707738	0.15428924975424	0.173385614706861	3.7778655789929	3.87570423489424	3.89140239601613	4.43891197409942	5.8537496616946	5.98870840011986	34	93	102	0.00516184922948772	5.75306122448981	0.00991811766140369	8.15670845003052	0.00385364605025682	10.000850340136	0.00989471757266877	8.49535331694353	0.00610412328196584	3.75510204081632	0.0103314150109263	7.86260908130254	0.00472262615830105	8.06663890045814	0.0101063522295573	8.2489061459792	0.844840241496019	0.508431272355646	63.1216147164027	1308.98875830353	0.7828	2.95202667993963E-05	33878.5861011753	2.49501418108981E-05	28596.7566706323	1.49097405365184E-05	17395.1609606541	0.854574553522929	35.4269058295964	70.180269058296	1544.96771300448	0.892
183.602	173.6328	169.082	22.3641229651422	34.3060047828365	43.751261421815	-0.789774794640831	-0.531985202100322	-0.605524702925836	2.25936702427977	1.82547334487196	1.87950374645073	5.82721849629129	6.44094530166644	6.71144036781295	91	120	146	0.00213744273219493	21.1885714285714	0.00100901525210129	9.35658962858316	0.00182902667869871	28.6909013605441	0.00104646290586081	9.53296293286167	0.00305506039150355	3.90408163265306	0.00100781741215047	8.86415665290743	0.00197769185788026	21.1137026239067	0.00101239121022142	9.42627183063776	0.918960506468272	0.293143120110446	31.1638288080994	1767.91302346986	0.8692	3.59605829528155E-05	31852.1670501611	3.30362463096655E-05	29250.0478406709	9.52060060432847E-06	10071.6254026691	0.900091056406186	33.1227922624054	35.8553406223717	1861.36501261564	0.9512
240.2872	122.4964	109.8676	2.24924790985787	6.81976444167979	8.6661450622523	1.01565748102843	3.45529833313904	2.66336486292274	9.13279349380504	20.4895722318465	14.2872493320011	3.0512536743595	4.15564369094832	4.62207794629238	25	65	74	0.0415113702623909	2.4530612244898	0.0354036528591913	5.34111723986858	0.0303588059373411	6.14795918367347	0.0321178922770013	5.75309757725074	0.0387691795085383	2.94204081632653	0.0350196326894255	5.44242567440275	0.0324456993398387	4.08954602249063	0.0339201367337472	5.64869487643486	0.613583830732712	3.66234817813765	109.775708502024	440.034817813765	0.494	4.01001966370211E-05	24782.5384615385	2.42767771672593E-05	15454.0920309706	0.00015043262713083	88092.3303643725	0.680327816921247	47.6658781785926	149.519219396807	728.08574807806	0.6764
197.2424	141.2624	138.256	9.4158399646553	13.0313447594636	15.4438357929628	-0.178053860683377	0.354813378564282	0.353724718741969	2.05055811447007	2.77488564760798	2.78427341699209	5.11987973231389	5.64501810763335	5.85694798747508	40	63	73	0.00556967930029155	5.57714285714287	0.0151872582676678	7.92538499118822	0.00406478492757647	10.8014455782313	0.0143199782587453	8.32838937407854	0.00617342773844232	3.92857142857142	0.0153699012806978	7.73017667106772	0.00474656453882798	7.40816326530612	0.01494699613268	8.12862045766886	0.857909244856999	0.468138484696438	74.0045158053186	1379.86603110888	0.7972	3.99172930845775E-05	24980.8339187155	3.41901960205314E-05	21462.3207208563	1.90643995660594E-05	11445.8876066232	0.859357973060633	35.1468624833111	81.4218958611482	1576.27814864263	0.8988
229.5804	155.896	149.9636	5.13687997134447	15.0811532715506	17.1165380565113	0.2838791512639	-0.0266691591960172	-0.183415116723869	3.03017684923588	2.70452923158521	2.57740942801446	4.36448090363261	5.81049357616589	5.9839808229004	35	84	90	0.00507155351936693	6.88326530612245	0.00925381394481578	8.1386249776286	0.00394800777453841	14.8852040816326	0.00886147385360221	8.55068980755019	0.00577559350270721	5.47877551020409	0.00914346075733937	7.99220574905678	0.00461091371584209	8.81424406497293	0.00915536260671638	8.24912358671959	0.861710358626557	0.548159354513364	60.8113968734241	1387.87846696924	0.7932	3.1416730567342E-05	31873.0711043873	2.69049045340414E-05	27625.7156268117	1.8904535448112E-05	15933.5199193142	0.853384636722226	35.8220914440924	65.1521050248981	1526.9248528746	0.8836
199.9252	151.0472	147.4312	17.3100781326948	45.9912358190123	50.1047030383376	-0.166119424362299	-0.0162582795747805	-0.0161209795709506	2.73615962552796	1.23746647959646	1.20050121173099	5.94656035896346	6.52458912125809	6.48731206104084	90	137	140	0.00374843815077049	26.2828571428571	0.000955739244348484	8.689858670469	0.00287062103753068	31.9281462585033	0.00096284100308433	9.0390035385849	0.00410995418575596	2.97510204081633	0.000961693960941824	8.52091393406569	0.00331442490382581	26.4310703873386	0.000952999915822817	8.81850957645705	0.890255291906868	0.462396894711305	26.5934012615235	1556.91169335274	0.8244	4.20531890076457E-05	27592.5982532751	3.82297017124702E-05	24094.5298450691	1.6079994272274E-05	14649.9815623484	0.862609401057356	35.3107142857143	31.5294642857143	1587.04732142857	0.896
215.148	147.6524	142.1616	11.8418451264995	16.2911379050084	19.3743409033701	-0.442872659670836	-0.0870942890113546	-0.127688505171298	2.22052026987751	1.69139180233279	1.67539797026843	5.38651008936578	5.78403814723025	6.0030148861007	54	64	74	0.00666522282382341	4.04163265306122	0.0112035718579494	7.77850146031864	0.00450224732750245	10.6267006802721	0.0106341990523979	8.34002178712318	0.00578059142024157	4.58775510204082	0.0111310848731485	7.92402913569476	0.00502896804243548	5.69679300291545	0.0109892045628275	8.07128187539615	0.79987886320301	0.941638608305275	57.5712682379349	1060.07182940516	0.7128	3.54223636386089E-05	28227.8136924804	2.8240186763936E-05	22646.4414596209	3.49717083300536E-05	25409.1184062851	0.838342312958168	37.1977507029053	67.6541705716963	1419.76194939082	0.8536
239.5132	124.3464	111.0328	2.53949320928409	6.02767011705186	6.65255771564591	-0.761084937830336	2.35173454666705	1.37958559270483	3.92142689068259	13.9054334789979	7.60626828543932	3.31538601403478	4.28628730961425	4.52181242871307	17	56	54	0.034030820491462	1.36	0.0589273782087965	5.52043014139709	0.0283414173492527	2.05739795918367	0.0616783250420504	5.75971740902405	0.0386339025406082	0.869387755102041	0.0661469574958377	5.27302808454527	0.0308872760742305	1.62598917117867	0.0635234106992329	5.61394088037599	0.637236404262025	2.99847792998478	106.794520547945	502.432267884323	0.5256	3.96950768654561E-05	24961.8272450533	2.50605224654128E-05	16072.382081164	0.000120897010591501	73498.8302891933	0.671536874761148	49.3365853658537	126.753658536585	685.814634146342	0.656
226.0088	156.4756	151.6048	4.84684666149033	14.0584140158127	15.4424032119356	0.273094463569749	0.0958923005986768	0.0154375879172802	3.48327732600765	2.46812531864245	2.35155643166944	4.29308221719183	5.75605123960459	5.89902193291972	37	80	83	0.00415760099958351	7.80204081632654	0.0101494509319446	8.33295588004293	0.00292738268776896	18.2325680272108	0.00973324663873425	8.81770801420247	0.0045634319033736	6.24	0.0102436335045636	8.20338630113673	0.00403500485099141	8.58059142024157	0.010253098379205	8.35334392206592	0.883031965895208	0.40406976744186	60.9021317829457	1526.47189922481	0.8256	3.17673524039496E-05	31499.375	2.79388526212491E-05	27925.939169587	1.3435728297821E-05	12159.4316860465	0.875473975323922	34.3069565217391	67.1704347826087	1683.93913043478	0.92
228.216	163.5228	159.0104	5.59783386677383	19.8902961305256	22.2765502679387	0.0417186289145639	0.607567157074946	0.582786316278586	2.91679697245679	2.80106274948901	2.73297277923955	4.50049532340939	6.20326081999608	6.35982675663131	38	95	104	0.00242698875468558	13.6722448979591	0.00498192112722116	9.09526751007596	0.00167862638252584	34.4047619047617	0.00470411343663984	9.57002897322077	0.00247230320699712	15.5281632653061	0.00494417301225398	9.1156436517944	0.00225280976741434	21.1211995002082	0.00488411312116603	9.24181046491316	0.907070040432956	0.294008360427311	47.0352995819786	1693.24523920111	0.8612	3.01250978574877E-05	33545.6047375755	2.72497432086723E-05	30497.3963913087	9.19212993414204E-06	9556.49465861588	0.904806923681403	32.8099208003335	52.2580241767403	1900.74322634431	0.9596
206.5116	122.448	112.9072	5.1645973163452	11.6091384693267	11.2131078724857	-0.54026189457627	1.93096542592997	2.04981409559461	3.05691762870491	7.25344273741523	8.07034477915543	4.34814398568348	5.08058504601334	5.02903160169036	30	70	73	0.0128229904206581	3.76408163265305	0.0160572991647231	7.08514427123365	0.00994268881021783	7.09013605442176	0.0161007282801742	7.4168890909135	0.0140901291128697	2.68979591836734	0.0168210856236717	6.92206620644797	0.0114215564422778	4.69304456476469	0.0164793848603008	7.20143389553641	0.797845459030975	0.897867564534231	88.9483726150393	1054.34567901235	0.7128	4.58067092037983E-05	21790.682379349	3.62276912143761E-05	17556.7841380619	4.30667317435565E-05	18542.1812570146	0.815651709503352	37.78	100.913333333333	1310.23714285714	0.84
139.8548	113.2704	96.9135999999999	20.9572163456887	25.3098179337584	29.9607165308175	1.56196061204039	2.01841769056478	2.31226829217506	5.48882680651384	7.13257906472638	7.66937868858746	5.98882961443245	6.05015490767965	5.73710247326644	116	136	149	0.00261424406497296	31.1897959183674	0.00189996926179115	9.04343126401347	0.00234566615761948	28.6777210884354	0.00188687614876572	9.1481945281659	0.00435218658892129	2.47673469387753	0.00170500120813739	8.33820481800668	0.00247033679046336	33.3211162015827	0.00190981670217392	9.10324388692639	0.928495640259093	0.205381165919283	45.2493273542601	1854.10403587444	0.892	7.43972572957468E-05	15135.833632287	6.85367535991373E-05	14254.2311097409	1.70661905377193E-05	2503.1134529148	0.903085277740796	32.9757118927973	48.8542713567839	1884.42881072027	0.9552
174.8004	142.4436	142.1304	13.5709601664731	6.40621721767222	7.36069261958411	0.099970331350571	-0.496616544258974	-0.657771343745852	2.22472117346182	3.10669886696049	3.3942040442443	5.70178296755404	4.6592187026759	4.84408462606127	61	39	46	0.0120326530612245	1.97591836734694	0.0304151351826387	6.85551728276004	0.00877564035818406	3.76530612244898	0.0303682011150224	7.27385547702225	0.0112829654310704	2.05714285714286	0.0302954720172563	6.90120645841236	0.00909883966506389	3.48313202832153	0.029862423516454	7.2316170711006	0.753990339121224	1.04860699466509	81.1837581505631	889.200355660937	0.6748	4.26683011450299E-05	23264.1499703616	3.20440779104021E-05	17612.914834613	4.53182178410906E-05	24046.4238292828	0.810925055781277	38.368115942029	95.8811594202899	1276.37584541063	0.828
192.0908	186.322	185.2224	15.0038180260892	26.3954374087644	32.2192634652004	-1.46983128523006	-1.15962919955927	-1.23564019200161	5.21013822427252	3.57237875970318	3.7905475628687	5.49641526335963	6.27919599321209	6.5275876880712	91	116	142	0.00276951270304042	20.8342857142857	0.00192489026325213	9.09044237303104	0.00224624288490905	28.1169217687073	0.00221519008271546	9.31536873653767	0.00338658892128281	4.03714285714286	0.00184500819774624	8.73623882265471	0.00243737815060745	21.164514785506	0.00193591025488877	9.2481252165862	0.904786206580874	0.350282485875706	36.4152542372881	1664.88041431262	0.8496	3.02328183604179E-05	35482.829566855	2.76311356137106E-05	31891.0374526575	9.34502205872428E-06	13415.1694915254	0.888328613941728	33.9518072289157	41.6419965576592	1765.7504302926	0.9296
229.19	143.3576	136.2128	8.90457747453522	20.4726383800428	22.7893202215424	-1.24604760547256	0.962808834768489	0.996555478545492	4.21243659605988	3.07270649736076	3.25518702265701	4.78049751296077	5.93835120977885	6.13893386406728	57	88	100	0.00782007496876301	10.0089795918367	0.00561536291916144	8.04147817587094	0.00605975808690837	18.2733843537415	0.0054834696202107	8.37663872091627	0.00961732611411916	5.2065306122449	0.00562374019105502	7.73354987659743	0.00756782411049406	11.3011245314452	0.00559328859086687	8.03876327950388	0.847300158336235	0.746065057712487	49.7785939139559	1286.90661070304	0.7624	3.46384203921125E-05	29215.2822665268	2.88589878945644E-05	25173.9294320818	2.9118550921429E-05	19017.6521511018	0.834123758358347	37.1809657759025	58.019221753399	1402.00046882325	0.8532
182.5048	183.4772	184.0768	11.8682255185853	12.4479347748934	14.0827164197821	0.603692977161151	-0.853876791179358	-0.745916596947679	3.54553923268319	4.20958046569116	4.02241649123697	5.4813665797546	5.53780224367991	5.705508899355	68	75	85	0.00609412744689712	4.99877551020409	0.00979772600247093	7.98042484185984	0.00538223367578326	5.14455782312925	0.0102634197040403	8.14123006371136	0.00768446480633069	2.31551020408163	0.00986659025439747	7.61958290693409	0.0049620099635703	7.10912119950021	0.00992301171517742	8.28068585980259	0.84474873903878	0.658155289213132	56.5695674830641	1285.47003647733	0.7676	2.98252177636523E-05	33594.8457529963	2.52172232909976E-05	28359.610221886	1.91275779014779E-05	22630.6023970818	0.832274032016038	36.9953314659197	62.0672268907563	1398.95611577965	0.8568
184.1808	175.1352	173.3092	18.4537506041455	31.9647199418359	38.8876329359348	-1.39651844798093	-0.95056141938753	-0.932817962099039	4.26651953082508	2.58077692635637	2.54383712926931	5.69090030085259	6.33077989181604	6.63629164583301	91	125	147	0.00468504789670971	14.5363265306122	0.00132541167860023	8.79840704150599	0.00368806110879725	17.8839285714285	0.0014283143097129	8.97043244749291	0.00496626405664307	3.05142857142857	0.00129223959657258	8.47982087929776	0.00339595417083782	15.6359850062475	0.0013183294173598	9.03877255667456	0.875065660697742	0.668508287292818	31.1396283274736	1445.23907584129	0.7964	3.58424209742398E-05	31522.2451029633	3.20058534417217E-05	27158.5565574787	1.89419139609767E-05	24145.3892516323	0.860895894027756	35.6468468468468	39.6945945945946	1569.31531531532	0.888
219.3608	135.8964	128.3304	4.27422780862228	8.70007281808607	8.50743415137608	-1.3221294642519	0.603288948392644	0.591942270620458	7.3097873754246	3.1742838148014	3.33789177212048	3.98049208952605	5.08436114987824	5.0569107510131	31	52	56	0.00951903373594337	3.80489795918367	0.0297898962199489	7.19306041470583	0.007499045536582	6.39455782312925	0.0283579344504476	7.53971051488409	0.0131528529779259	1.94734693877551	0.0307680158742039	6.7708559011503	0.00946450710093893	4.00041649312786	0.0298270598975964	7.21455232663105	0.837209199232947	0.548420507509063	101.741584671155	1266.37752459865	0.7724	3.85530724042685E-05	25740.1341273951	3.21837129757028E-05	21611.1903157576	2.17888470503386E-05	13688.1558777835	0.841354816628998	35.9776968593537	109.350477924442	1467.86299499317	0.8788
178.4364	146.962	148.2348	7.22332022272307	13.1409495851708	15.1867201515008	0.00936092327295246	0.463296846926978	0.486696717928183	2.25523552392254	2.54759567448804	2.63198845903899	4.84097905265739	5.62381717906008	5.82567267302736	35	62	71	0.00537576009995836	4.62081632653061	0.0132509282154993	7.92327200070951	0.0042813468924985	7.44047619047619	0.0131109786575132	8.21641004186971	0.00693177842565598	2.90244897959184	0.0136267694298501	7.61420814864204	0.00459183239803074	6.56101624323198	0.01319318294642	8.11626385169358	0.844221361008171	0.531457800511509	70.7759590792839	1305.31406649616	0.782	4.07795452080343E-05	24470.1498721228	3.44728356162957E-05	20618.3171232348	2.11441255518501E-05	13399.8982097187	0.853344268966121	35.5515069725596	76.4970760233918	1535.21412505623	0.8892
226.9352	151.0472	146.7496	6.49102464638673	14.9003144986943	17.4809753686686	-0.245784687877581	0.579329548186895	0.49265080404089	3.36590861684635	2.88164231075705	2.77094239537844	4.71336804453468	5.80288110853624	6.04905685678666	44	81	92	0.00453444398167431	7.20163265306124	0.00941063676573298	8.31442232631921	0.00311791383219952	15.5310374149659	0.00921533920347667	8.78861537133384	0.00449779258642233	6.4526530612245	0.00961572435511597	8.27666317456051	0.00397047530348404	10.4510620574761	0.00951987042036401	8.49820041368135	0.86489642420198	0.4994994994995	56.6236236236236	1409.92592592593	0.7992	3.30043154239652E-05	30362.8558558559	2.83903886031538E-05	26406.0204258425	1.7298628122471E-05	14409.3798798799	0.881913097793312	33.8882201203783	65.1444539982803	1732.36457437661	0.9304
240.5928	125.0872	111.99	2.13405439480816	5.40329493550001	6.46005417933937	-1.34841443386792	1.93079874801699	1.72609121811134	10.8289919839298	8.65729915337109	7.51882294996125	2.94991537315767	4.02657853138415	4.40491588620829	24	41	46	0.0421414410662225	1.67265306122449	0.0583626773857531	5.40093309867298	0.0336827970984309	2.96768707482993	0.0546188187589641	5.75987463523974	0.0433869221157852	1.32612244897959	0.0585105331844372	5.3736436598588	0.0346091738465909	2.44564764681383	0.0561403288424191	5.6264716367728	0.620323499095644	3.54588607594937	108.571202531646	461.238924050633	0.5056	3.91917539352138E-05	25282.3164556962	2.40756526319841E-05	15851.0126913436	0.000142445565720388	87231.9319620253	0.663839948425957	49.4981640146879	136.762545899633	669.987760097919	0.6536
147.352	122.9608	107.9388	17.4040252815261	26.6982707934428	32.1354610136528	0.535342317310263	1.53936119837326	1.80444759964192	2.97166609377704	4.95877494670741	5.50938967463664	6.05573034804805	6.28923372869358	6.27169221967715	85	133	147	0.00178392336526443	40.6126530612245	0.0018101321315667	9.5439857160947	0.00162909551575736	48.0701530612244	0.00212575890673614	9.64839090630843	0.0029107871720117	5.63142857142858	0.00172973715561604	8.92040218766269	0.00160231029657396	44.1995002082467	0.00180333947976292	9.6554714261702	0.94662999037999	0.111688311688312	39.4952380952381	2010.64761904762	0.924	6.42086934917096E-05	17268.9298701299	6.04357348099014E-05	16470.5862373737	7.8028093542067E-06	1674.76666666667	0.900941029443287	33.0604534005038	41.6918555835432	1868.6591099916	0.9528
237.4148	134.036	123.658	4.49679229673775	10.8704509566071	12.1817665385608	-2.74120109214292	1.77045033066783	1.57254242283742	13.8981824670594	5.72825832077167	4.88044729679072	3.60892266639136	4.70007593281368	4.96750150640561	40	62	67	0.0283092044981255	4.61183673469388	0.0173300651082598	6.46231401025022	0.0224967750705728	8.59566326530611	0.0173091400486248	6.79291662107868	0.0286990420658057	2.80367346938775	0.0180864026563316	6.34782354965924	0.024555054025282	4.47563515201999	0.017850485180174	6.53536956882866	0.750899531753033	1.81963033779477	91.8196303377948	819.152963671128	0.6276	3.63014302273104E-05	27476.8986615679	2.67898668816768E-05	21012.2856022573	7.00843266516698E-05	46727.1057998725	0.771699819810541	41.582726326743	116.809573361082	1065.72008324662	0.7688
206.402	157.1028	154.6092	5.62149410744154	7.20906597001304	8.15806811444965	-0.468881014352308	0.0314919650340366	-0.145004012590698	2.9126154616799	2.6105445073623	2.5410883970027	4.48017707685589	4.86392348519361	5.03092487900808	34	42	45	0.0107558517284465	2.86653061224489	0.0385624385348032	6.95986393659722	0.00841952427229391	5.05697278911564	0.0365812571705895	7.29269713155915	0.0139015410245731	1.78081632653061	0.0397983523844079	6.62392962654639	0.00988950008855464	3.3856726364015	0.0382832378654048	7.06679605623934	0.827803955524768	0.553002610966057	109.502349869452	1224.81723237598	0.766	3.36593590331983E-05	29464.47154047	2.78517370062897E-05	24402.5046222802	1.86744547967133E-05	16235.5953002611	0.832763987128827	36.543648960739	117.602309468822	1413.95057736721	0.866
186.5884	153.8852	153.6764	8.52219369880783	8.93384692951474	9.86641186247564	0.333540946903981	-0.253684502978569	-0.358767439011081	3.12576152252404	2.69769528424537	2.620392220033	5.08748539667466	5.13385383044984	5.25160226982589	48	46	48	0.012904289879217	2.50367346938775	0.0318271446742421	6.9083511712131	0.00987074251469293	4.69387755102041	0.0304915247940977	7.30244096934637	0.0138065805914202	2.11469387755102	0.0324649075733369	6.79145064990119	0.0109563192207328	3.62015826738858	0.0313899451573705	7.15614681383956	0.790556071435785	1.10652920962199	93.8556701030928	1013.34364261168	0.6984	3.71519754592708E-05	26713.1620847652	2.9435168675719E-05	21070.847816167	4.04690688936174E-05	29988.0624284078	0.813163009943741	37.6856871136472	109.432715168806	1302.92201616738	0.8412
211.7956	127.958	119.6144	8.37822300013553	28.1174009467447	33.7041735196103	-1.06130582316941	1.80469387285625	1.69231734405098	3.80876742150873	4.93253681201286	4.56552812342793	4.83466400619828	5.31406028647364	5.62252792980609	51	114	136	0.014796501457726	16.8563265306122	0.00256907376452083	7.34595440051898	0.011933685038641	25.6466836734693	0.00247405132989672	7.71143831733852	0.0179321949187833	8.9008163265306	0.00261103841679896	7.24847754187325	0.0129477149341319	25.4069137859225	0.00251924975324128	7.57654483518033	0.804229219591734	1.04653802497162	67.0851305334847	1061.92962542565	0.7048	4.26972859207839E-05	24613.5323496027	3.33520787013732E-05	20476.8808143414	5.08882019118434E-05	21422.3325766175	0.798684165025291	39.4269440316989	80.6047548291233	1204.92867756315	0.8076
245.072	133.84	118.2772	2.43664030993497	4.30599581978432	4.80345294137457	-0.151878979208557	0.583657735421262	0.489367945586114	2.64062097428668	3.0479677929058	2.67752444482944	3.31316526866138	4.07567057862402	4.22751140015216	14	25	26	0.0229974177426072	1.6869387755102	0.0844931476551953	5.92027968617267	0.0199949239900042	2.27848639455782	0.0816290537432649	6.12686090072678	0.030386339025406	0.822040816326531	0.0883122254811232	5.50998996131439	0.0207294232706385	2.1137026239067	0.0828823568436671	6.07922794502061	0.743326579301459	1.28117359413203	142.481662591687	837.764058679707	0.6544	3.60876566072634E-05	27422.5061124694	2.67695508443841E-05	20425.9418141974	4.68902746218699E-05	34623.7542787286	0.75455776761584	41.7895287958115	152.110994764398	1009.4942408377	0.764
201.1052	103.0216	89.4824	5.43703347056095	7.53389231672447	8.38494425980281	-0.246456277123774	0.785213519001954	1.17813651437809	1.99449670502828	4.77191249897452	6.29535273560724	4.340300803478	4.79280797402014	4.89602900706811	27	59	67	0.0161979175343606	1.89428571428572	0.0239646984562412	6.39915525484627	0.0129778101716877	3.23639455782313	0.0239564308756958	6.73457483472095	0.0184096626405663	1.39428571428571	0.0236878933953675	6.32026915900285	0.0137633545373032	2.44231570179092	0.0239874741347223	6.63503238525786	0.684675221181369	1.9207650273224	66.2103825136612	639.180327868852	0.5856	5.80591315241469E-05	17142.9364754098	3.97063348172144E-05	11764.1290934313	0.000109917867832586	33325.7486338798	0.718600013164036	44.2920353982301	78.7212389380531	865.431415929204	0.7232
225.4148	176.8652	175.8716	14.2461061683535	20.1917564604965	23.3894829664959	-0.521876505963797	0.33907205024724	0.292086362993525	2.0961332635929	2.13404188904518	2.06533624883094	5.5502721739152	6.15753535738698	6.34226128014067	53	93	102	0.00373444398167433	8.68040816326529	0.00664493324865962	8.58850574459338	0.00257452045444025	19.2784863945578	0.00651287571003378	9.06205243249361	0.00359550187421911	10.3881632653061	0.00655041617379756	8.72820806409965	0.00265837450416762	17.1232819658475	0.00647002205384722	9.02878529738184	0.880610096144236	0.482859941234084	49.6483839373164	1501.43388834476	0.8168	2.71477104577376E-05	37019.4471106758	2.37940580537704E-05	32747.826513103	1.39801449529701E-05	16724.3761018609	0.872175461627028	34.5577933450088	54.7329246935201	1658.82486865149	0.9136
183.7504	88.6256	76.8928	7.86028624415167	5.56688644037221	5.76774723440617	-0.453984419641666	1.58974144568196	1.61078035316263	2.71855200978875	7.01174540847863	6.65169748812652	4.88525502638414	4.23783142803277	4.26798021743969	39	38	37	0.0159270304039983	1.60612244897959	0.0332867391420014	6.42021564111553	0.0147236828404831	1.97789115646259	0.0341478813915221	6.50338268327605	0.0224839650145772	0.687755102040817	0.034310348448842	5.96328068940819	0.0140110647357992	1.99500208246564	0.033634446565076	6.59721489389711	0.727685551979661	1.56413529036375	87.9317166560306	768.846841097639	0.6268	7.38787634853757E-05	13419.9259731972	5.3702318731659E-05	9778.9197147567	0.000114466607245028	21194.2405871091	0.723427747000617	44.1482093663912	94.6066115702479	880.51955922865	0.726
222.2012	178.0116	179.2932	14.037546742932	32.5773213361688	37.266961692094	-0.649685293882424	-0.145086619502838	-0.205518680584379	2.32682972625032	1.39226466371002	1.41356067110909	5.51887666347564	6.39427816677091	6.52578485436864	62	108	122	0.00349620991253644	23.1832653061224	0.00219697201774079	8.91161021364167	0.00239845087694941	46.2746598639453	0.00216622014157614	9.35730598940938	0.00341624323198667	15.0873469387755	0.00223525706484037	9.00052481432939	0.00288110552298334	28.8084131611828	0.00219237934307361	9.21233150246618	0.893007929947935	0.441658630665381	35.9093539054966	1576.89103182257	0.8296	2.80191764264006E-05	37008.4455159113	2.49877814474409E-05	33041.2214883631	1.22428155192636E-05	16648.418514947	0.88402717815337	34.1805976613253	41.6730186227804	1734.6067561715	0.9236
238.9708	124.4028	109.7852	4.53258726998168	10.1377587345527	11.8896871682984	-0.892258809242243	3.49393022632647	3.22719151186411	5.53750056789678	19.1940646204873	17.0453374335269	4.09264607430741	4.29845022923815	4.66994576362848	37	91	103	0.0368186588921287	10.6155102040816	0.0162206224305648	5.97371001397991	0.0315489928964777	16.0761054421769	0.0161284631376321	6.15277257486715	0.0413384423157021	5.53061224489795	0.0168476377739775	5.75861029739606	0.0314399404246569	13.3665139525198	0.0159468400007433	6.19468296385593	0.720648859754776	1.81824104234528	123.700977198697	739.161563517915	0.614	3.95644676096515E-05	25237.4801302932	2.80019314618276E-05	18562.819614274	7.55312576252973E-05	43237.1179153094	0.714668866667501	45.1913337084975	142.358469330332	840.744513224536	0.7108
243.1936	128.208	111.4004	2.61933561041727	7.06580045005518	8.30407609791722	-1.5495187410586	4.4306120284698	4.40818719272597	9.57895081017592	32.4756765009555	31.4289460648558	3.18870628147059	4.07275934538448	4.28251665196279	28	83	94	0.0382987088713039	5.50367346938775	0.0331862699886766	5.60363274086874	0.0328263107964271	9.76062925170068	0.0299403327468926	5.78756447822367	0.0456176593086216	3.87224489795918	0.0343229414864788	5.29933071080748	0.0317962406681517	8.00541441066223	0.0311804404375504	5.83483012432759	0.667545667194353	2.28317955997161	133.767920511001	586.64371894961	0.5636	3.8040215574707E-05	26110.9481902058	2.51522391110773E-05	17632.7789635725	8.84392221735496E-05	58247.9361249113	0.69103948383069	47.5155974102413	153.592113007652	752.027663331371	0.6796
232.582	162.8148	157.9252	11.1980746559397	21.6706922122945	27.6972418294674	-0.9503611176865	0.781167363451633	0.737021145770579	2.8806844437478	2.3206850409725	2.2475609180941	4.92862155027439	5.91550853464997	6.27658062969101	52	80	98	0.00906055810079138	7.67183673469388	0.00587575909045816	7.94786359151326	0.00768089974084884	11.3805272108843	0.00604380716121502	8.1683815721376	0.00988987921699293	5.49224489795919	0.00577542013162606	7.83690220916001	0.00772012771993348	12.7551020408164	0.00580949144949799	8.20423201614727	0.795927526677616	1.17466743782533	44.0954308849046	1019.13533834586	0.6916	2.92475499780234E-05	34483.6865240023	2.29053185023835E-05	27879.0961997382	3.75946806991269E-05	36768.0659340659	0.809597566735952	38.9491193737769	53.7289628180039	1257.37671232877	0.8176
197.5876	190.5756	196.6084	11.9032401572009	19.3056956528378	21.8018863734311	0.555666947916558	-1.62791118155494	-1.62660132934403	2.17859010696365	4.78258051982233	4.80728780404147	5.27910775674148	5.52337053244782	5.65983161344614	53	89	101	0.00907921699291963	8.79183673469387	0.00715359898754213	7.83333297744817	0.0068602058170207	18.1028911564625	0.0076239273924287	8.14323601723021	0.00966763848396503	7.88244897959185	0.00698235584941123	7.76693702590551	0.00776418821742504	11.9537692628072	0.00712078338101016	7.99973321403797	0.829090619184825	0.828200972447326	64.3765532144787	1191.14910858995	0.7404	2.72246135907422E-05	37051.9297676931	2.27900710916789E-05	30464.3792663125	2.10162251424758E-05	32455.6769313884	0.84105867743979	36.5405904059041	79.1614391143911	1449.89483394834	0.8672
224.1212	135.5416	125.3856	8.53356376668037	16.3739142980535	20.9348349083531	-2.72140138571454	1.99384016420816	1.86869833634181	12.8201816357176	6.34352447263007	5.77672249086957	4.57075594041691	5.10033180848261	5.48206001855011	63	88	108	0.0167353602665553	3.38612244897959	0.00906359054160199	6.92496868241638	0.0123237858068395	13.906462585034	0.00912316609913096	7.37076363915896	0.0165257809246144	9.53836734693875	0.00864564396771842	7.073042590871	0.0139968404807034	10.4652228238234	0.00881061872573292	7.22760134044829	0.73624667018427	1.5598480050665	70.1260291323622	792.189360354655	0.6316	3.78866692501295E-05	26550.9639012033	2.74356696348376E-05	19914.2704837234	6.25885844372533E-05	38645.9575680811	0.801245842693933	38.9118942731278	91.223201174743	1226.65345080764	0.8172
222.0704	139.6308	132.098	10.9781165889236	32.9798376490849	39.079810593195	-0.746891692578051	1.34798657236939	1.31868092087089	3.0948931536826	3.28212567043117	3.08972187352867	5.00971517370877	5.71489294575331	5.57061112009113	62	133	144	0.0142680549770929	12.4118367346938	0.00201873034061668	7.45298379451447	0.0108848598963393	11.9583333333333	0.00213139507001267	7.69606382448428	0.0128129945855894	7.80244897959185	0.00199803957819537	7.44432630042328	0.0112467021845158	25.6480633069553	0.00200253826532777	7.72344778989975	0.763155544249001	2.09407216494845	35.5386597938144	839.244845360825	0.6208	3.63679661557689E-05	29470.7190721649	2.6358279330086E-05	23841.9624400159	8.91970568294604E-05	48815.2306701031	0.754699084106217	42.2101372756072	52.3421330517423	1001.90496304118	0.7576
184.3888	99.5972	89.5348	8.46522501532003	21.878751156316	25.6637173644038	-0.436605077597332	2.0090412270272	1.88490647968972	2.65045704140553	6.2248108153656	5.58133493836265	5.01691908703118	5.38221477380949	5.50228349245015	49	110	120	0.0113859225322783	17.6318367346939	0.00436483512212348	7.43044981188897	0.00999908892128258	20.0510204081632	0.00485302771924276	7.574848827786	0.0153615993336111	3.76612244897959	0.00422911039097981	7.06208484722844	0.0109670741453172	20.3469387755102	0.00441001216450153	7.4766076153665	0.804350695513905	0.921743991056456	60.9832308552264	1077.38904415875	0.7156	6.43754338985283E-05	16272.9128004472	5.03471963997913E-05	13570.1663641709	6.66473328893695E-05	12596.8826159866	0.772692122376119	40.6886166411434	69.0418580908627	1088.12506380807	0.7836
213.6588	125.2136	116.24	6.98581294911337	24.0191584998309	28.4225684975866	-0.681267879422922	2.01856055669486	1.92459783232303	3.36058893490499	5.93076996625021	5.55083084433096	4.73991280277821	5.15813618869393	5.44398076092022	46	105	121	0.0183700124947933	12.089387755102	0.00359079728834012	7.04067727347065	0.0146651134943771	23.8112244897959	0.00363692405762957	7.32710736265806	0.0174707205331107	9.57142857142853	0.00357169267530716	7.1946121915425	0.014455139041226	16.6076634735527	0.0036264109846266	7.38396080181096	0.769220867918245	1.62120272783633	64.0712957222567	886.522628642281	0.6452	4.28348271775366E-05	24260.2399256045	3.17454626734613E-05	19473.9908784744	7.86985916545499E-05	33134.7154370738	0.770995204264131	41.1526560082517	82.0820010314595	1072.25941206808	0.7756
218.684	201.0344	206.6552	11.4816437847549	25.9000157652462	29.7678268094935	0.562298165815266	-0.701931955089792	-0.700694343011789	2.35648192943648	2.18106958998446	2.22991055370936	5.3515215923903	6.27972775915107	6.47719183997124	55	102	118	0.00561132861307788	6.7595918367347	0.00379755017085798	8.37101337798888	0.00360635325558795	21.1181972789115	0.00368902777944503	8.95398482835334	0.00456176593086214	12.8126530612245	0.0037526221690173	8.66743511853209	0.00418036979940852	15.6026655560184	0.00376007694998525	8.76233491537244	0.821312114056931	0.841423948220065	37.3160733549083	1166.7216828479	0.7416	2.40961564907031E-05	42233.2243797195	2.00771373255083E-05	34198.2948547651	1.81587192630913E-05	39063.786407767	0.839112190937751	36.7431617987946	47.0287436254057	1435.5906351414	0.8628
242.9932	133.0592	118.8368	3.50467598502344	10.7469667981249	13.4324594084628	-1.48160207765958	3.33882180758886	3.12105423690806	9.0448282074459	18.2196623145326	15.8028437299421	3.54406850072502	4.71044764200807	5.03438877725733	32	93	110	0.0236308204914616	7.82448979591837	0.0162702721834243	6.36990404797303	0.0211641416770792	11.4349489795918	0.0174036075286845	6.47562057731265	0.0275468554768844	4.97877551020408	0.0167180607275286	6.14821323891724	0.0194901784120561	9.38900458142441	0.0170498366747076	6.6055809335363	0.741446413376973	2.00522193211488	87.9177545691906	779.351174934726	0.6128	3.62621853032694E-05	27548.5385117493	2.65408082145064E-05	20742.0680545068	7.57775891948137E-05	52476.0502610966	0.739808906819748	44.3683048039757	100.316399779128	919.012147984539	0.7244
244.9912	175.362	174.0184	8.30238053572588	26.911524594493	31.9757730389744	-0.716387932011401	0.408664153816456	0.209296640306294	2.47500597078086	3.15552799114981	3.12143192063294	4.68458051545119	6.13292809681413	6.41916971035004	36	116	138	0.00543306955435236	9.6485714285714	0.00281035587313412	8.44164343262366	0.00479147866629655	16.3724489795918	0.00277290483260083	8.61038435941474	0.0063353602665556	10.5551020408163	0.00278342421893707	8.34979370320185	0.0044495898470737	21.8975426905456	0.00276986245758332	8.74910823639279	0.854864077312913	0.646578140960163	47.0827374872319	1345.25842696629	0.7832	2.6052736379347E-05	39316.982124617	2.20859220595559E-05	33853.9445661796	1.9193450143285E-05	22818.0306435138	0.836959766384841	37.0981767180926	53.0158952781674	1416.19308087892	0.8556
191.1232	198.9676	206.148	7.17306223031698	10.3722008387806	11.5260615996966	1.21315295138758	-4.20659585935662	-4.15505719153648	5.16360730971876	27.8663777064891	27.140110877846	4.68783788899369	4.67658974082985	4.81941643605253	46	99	109	0.0140388171595169	3.46489795918367	0.0167190821101556	6.82248830523771	0.0107539827155352	8.56079931972788	0.0183813231422236	7.15413704956275	0.0148844648063307	4.65836734693878	0.0185976379637435	6.75992670719756	0.0117612038993193	5.82757184506456	0.0187176348255931	7.04790939124839	0.7773802095494	1.06050029086678	93.1628853984875	963.276905177429	0.6876	2.56073278084001E-05	38983.7737056428	1.99467649594239E-05	30273.9158559176	2.6886127317221E-05	41552.3059918557	0.80973066616659	38.3243243243243	107.959459459459	1272.94498069498	0.8288
242.3756	185.23	187.68	7.34635451363464	13.8777051417012	14.5095554721707	-1.08237475544055	0.694468096085976	0.690397223148207	4.19265409683026	2.76805951950358	2.75972114859184	4.71712227328429	5.64068996720461	5.71891733884983	39	70	72	0.00416593086214079	14.6404081632653	0.0107653937662768	8.55379254730821	0.003529345411634	19.0909863945578	0.0107460933736943	8.67943056561242	0.00497892544773012	6.66653061224491	0.0113580215813017	8.20563527482378	0.00339283177337778	20.9537692628071	0.0104005000002863	8.79580534531324	0.898980921358771	0.249883666821778	71.6542577943229	1652.66961377385	0.8596	2.41615634222575E-05	41313.3718008376	2.1654228396824E-05	37253.47385554	6.3106507427592E-06	9859.90693345742	0.890870431196281	33.4484076433121	76.4225053078556	1796.96772823779	0.942
192.6876	201.7364	208.0168	11.2737396741277	12.5824526639284	13.4306112206407	1.12418845674061	-0.639164268617981	-0.791738133380505	4.30837317087567	5.73437427352046	6.04502759548242	5.28456684979248	5.47299962041984	5.60368151453656	57	90	98	0.00649229487713453	5.46040816326531	0.00860581963597147	7.91113129458762	0.0046992861770559	10.015731292517	0.00874102537372068	8.30696188458935	0.00672353186172429	4.66244897959184	0.00859082617700051	7.87608254343327	0.00507649787043822	8.88213244481468	0.0085089438697737	8.22328834001004	0.84282272102276	0.710373880989995	54.7177461822012	1267.0663507109	0.7596	2.48803298147528E-05	40263.457609268	2.08796761319978E-05	34088.8393863729	1.81587211073138E-05	27737.850447604	0.846665719955737	36.0182149362477	63.9663023679417	1490.3606557377	0.8784
225.2212	120.4424	111.128	3.65385694301241	7.29697760994235	8.37852111055406	0.793836171515297	2.23613031553097	2.1112485102473	3.78105037686284	10.0638933727121	9.0240284311179	3.79677836789533	4.47888817922372	4.67254519137556	24	51	55	0.0224183256976258	2.87591836734694	0.0272950477200824	6.18340554569167	0.0177259041371653	5.0187074829932	0.0262946063038907	6.51967813230784	0.0230307371928362	2.16	0.0279125889767041	6.14545406393181	0.0184726237731363	4.32236568096626	0.0267343131261721	6.44400513244185	0.683550327981689	2.29064039408867	82.8367346938775	616.611541168191	0.5684	4.30770989405481E-05	23087.4926108374	2.90587128193953E-05	16019.7361714208	0.000101963925062893	50887.4327938072	0.721623621510815	45.2643419572553	102.838020247469	857.795275590551	0.7112
243.5184	147.0872	136.2436	6.31563626565052	15.0649924049101	18.4323047674457	-1.5750076340211	1.13625684018773	1.0988680499103	6.76295998368583	3.83268515583086	3.7263585325108	4.41610565835373	5.58302321367435	5.84522545732028	45	76	95	0.0089805914202416	7.93510204081633	0.00971970396086606	7.66532038962453	0.00766716125225611	12.641156462585	0.00950815935034479	7.95114001490724	0.0101434402332362	5.44122448979592	0.0095573910695573	7.51676879071196	0.00721568706361249	12.9050395668472	0.00942441281184917	7.97757174566492	0.832866885020037	0.737513283740701	62.7162592986185	1221.42933049947	0.7528	3.22036313979106E-05	31109.9840595112	2.65297933433146E-05	26205.2434732411	2.55572596706112E-05	21155.848565356	0.815937784391319	38.6011644832606	66.9708879184862	1290.06647258612	0.8244
199.4568	180.3136	182.6248	16.4426802486699	30.0955288214047	35.441772316858	1.05464361192198	-1.2409282680972	-1.29758256378053	2.84572155451127	3.03494533232174	3.23899121211131	5.42251338310596	5.94184835266343	6.17493559096962	65	109	128	0.00626772178259059	7.56816326530614	0.00301643457815409	8.06090558754213	0.00494187896246935	20.0429421768707	0.00299619160500972	8.40200761660276	0.00674219075385257	9.13795918367343	0.00309757257028816	8.03806106668056	0.00513374182387218	12.4314868804665	0.00306363843062497	8.30595614198459	0.825588075759692	0.854347826086956	46.2173913043478	1172.89347826087	0.736	2.96351834392235E-05	34801.5070652174	2.46027249207975E-05	28570.1644165873	2.52894629857959E-05	30032.572826087	0.814652381137968	37.9636363636364	52.8574162679426	1301.14449760766	0.836
216.3532	200.6796	205.6608	13.1939550461566	27.7508800552343	33.8745117065914	0.701034980712501	-1.31091805589978	-1.38858947870428	3.35713996976678	3.37279515310064	3.67828603903532	5.41893314010592	5.86070433936326	6.16094613016073	71	100	124	0.00559533527696794	19.2314285714286	0.0029926400943583	8.52439406582626	0.00409551575732335	33.5221088435373	0.00303763556674074	8.82643934102333	0.00557267805081217	11.9844897959183	0.00314849049828674	8.42100214128506	0.00449434421066748	26.3935860058309	0.00306174231125578	8.72726493191088	0.866631395687595	0.602427921092564	54.6287303995953	1403.79008598887	0.7908	2.42459723115935E-05	42235.6717248356	2.11914544530976E-05	36285.1816815179	1.39235366721668E-05	26751.5690440061	0.874600870178745	34.346974314323	67.5598606878537	1678.32868959512	0.9188
225.74	176.8532	176.0828	10.2436126439845	18.6896883269893	22.5543242895902	0.161045362341758	-0.393944210702532	-0.425669696864117	2.21939960440485	1.93752283338802	1.94607754434094	5.22200950262033	5.93547976438511	6.18201196223747	44	72	83	0.00550237401082882	4.8930612244898	0.00824640600899893	8.00099412689781	0.00493934818825491	6.8843537414966	0.0081684436626435	8.20556461917919	0.00805897542690546	3.13918367346939	0.00825078604489489	7.570208243386	0.00476703358884375	7.62473969179508	0.00810423217414739	8.25038210876637	0.868216641926439	0.44482929242949	60.9346857991094	1437.2929242949	0.8084	2.74000688084926E-05	36578.8109846611	2.38480772752888E-05	31664.9963483424	1.18953014879882E-05	16718.6853043048	0.838217840042356	36.5761772853186	62.3573407202216	1436.52354570637	0.8664
203.1264	204.3288	209.836	14.6313916986731	16.7681570412493	19.1879416300968	0.356604510351688	-0.536795010575399	-0.603449214464854	2.20146175359322	3.10818628686875	3.13052250627098	5.55051132738265	5.85661589175753	6.04145401477052	61	90	104	0.00431020408163267	6.63510204081633	0.0053667494484888	8.41361282255319	0.00383520755240869	9.48426870748299	0.00538722166035051	8.58639893813775	0.00499958350687215	4.07673469387756	0.00539271834867843	8.14578472424723	0.00329222118855447	10.7605164514786	0.00532482228724123	8.73855258912788	0.856435339902884	0.613367609254499	44.5670951156812	1345.76915167095	0.778	2.37628509400648E-05	42364.7208226221	2.02565081122796E-05	36426.0307892388	1.53881601957479E-05	24715.194344473	0.832751367379998	37.2638497652582	48.8816901408451	1393.73145539906	0.852
190.3464	148.0336	148.2468	10.7839513648755	41.1239355003871	48.6044801408265	-0.164995074260197	-0.209455193105786	-0.24650610333179	2.03575613956388	1.25596163469378	1.28136069784106	5.28276803285894	6.15889070273831	6.36860443481155	55	117	132	0.00451411911703462	20.5661224489796	0.00130270692178799	8.66163656897326	0.00343462214817903	35.6794217687073	0.00129628376744149	8.96659984800129	0.00512619741774265	9.53673469387752	0.00130306079003967	8.4380563967816	0.0039815771611197	23.2698875468554	0.00129131059991963	8.83985794361782	0.87328220164609	0.468641975308642	41.1313580246914	1460.48839506173	0.81	4.13380271741488E-05	26752.969382716	3.58347277595417E-05	23405.0089288066	2.19503112232078E-05	11529.0439506173	0.871661237512458	34.6871704745167	48.4736379613357	1652.44991212654	0.9104
231.004	147.362	138.918	11.5015470263787	38.2671838002223	46.4414219851201	-1.09226867510297	0.887057058632324	0.855884972479005	2.72434834155556	1.97797269534807	1.94289152666927	4.74163311530671	5.26562465647424	5.6330786038998	44	106	128	0.0280319866722194	11.4077551020408	0.00159167159162673	6.98257537255715	0.0242994093896068	20.2755102040816	0.00156990933170948	7.26275859123007	0.030089795918367	7.20081632653061	0.0016059153031155	6.83783212022867	0.0239319622654797	16.1661807580175	0.00158977621200766	7.20862808023621	0.76900802220973	1.6156670746634	69.1811505507956	895.684210526316	0.6536	3.41165085545668E-05	31251.4565483476	2.54792825413615E-05	24689.8181979427	6.36922381060032E-05	42517.7484700122	0.765165088925056	43.0171031533939	81.3912346338856	1019.1742383752	0.7484
244.6048	141.9512	129.5172	5.02400407643147	16.503551695317	19.4414223800626	-1.71217078601262	1.97190106287127	1.97485270004627	7.4767391915765	8.11941249741944	8.15251965429785	4.04790626140315	5.43739471405382	5.67350284635872	38	101	117	0.0144153269471054	8.52938775510203	0.00721355434202975	7.26164782580928	0.0119759851219397	13.3992346938775	0.00718991028801936	7.50373679598826	0.0153402748854644	5.77387755102041	0.00754322126639133	7.12241052328951	0.0118347537061556	13.9104539775094	0.00721602926327718	7.50587771554158	0.79179869836537	1.40869054609513	58.046388725778	992.432765707575	0.6812	3.32478994358869E-05	30280.3018203171	2.58584699276884E-05	24438.9250322993	5.17905149236323E-05	38039.9230769231	0.779717775024798	41.5490399584847	66.6367410482615	1092.84639335755	0.7708
228.376	170.412	173.0244	5.84775375678559	16.2698695753838	18.6285964216309	0.054167337654261	-0.204666222448368	-0.390112722750011	2.87673389873558	3.27698819661729	3.22816347340495	4.57768817536966	5.92034272310547	6.07475375430151	37	95	108	0.0031756768013328	9.88122448979587	0.00732411612083302	8.75178559729994	0.00230336607432086	23.1607142857142	0.00715366517922361	9.16319522748868	0.00320866305705958	10.434693877551	0.00738516222554118	8.74976426932203	0.00266357849993434	14.6014160766348	0.00732295424504649	8.9774516109472	0.904350476927043	0.266821345707657	58.691879350348	1681.69419953596	0.862	2.81910469063345E-05	35624.9870069606	2.54139573682526E-05	32313.1481504254	7.73791458508849E-06	9233.65011600928	0.894361722677416	33.2389193752638	63.9404812157028	1824.06120726045	0.9476
211.3192	188.7656	188.7712	15.8929327488667	31.6576224097768	35.7837120846902	-0.31308111687514	-0.932680636766714	-0.910506166456694	2.58751106457251	2.70391295147039	2.78499389432331	5.85007466171791	6.47111979422615	6.75173983768792	81	113	138	0.00396234902124116	5.81428571428572	0.0022496625780674	8.58850323410662	0.00217755044194549	32.7006802721086	0.00228499326405622	9.41268873311755	0.00255226988754686	24.7755102040816	0.00221735960294857	9.21052096173963	0.0025060708947282	27.640149937526	0.00223251758148433	9.2263889885488	0.821965760871977	1.01541850220264	28.7235682819383	1146.45594713656	0.7264	2.73599532489616E-05	38062.2439427313	2.26666163724816E-05	30998.4987726423	2.52744295170679E-05	41990.8028634361	0.908656677717957	32.7305613305613	41.3209979209979	1927.59708939709	0.962
219.1216	195.5136	198.5968	9.60685242105863	27.3477789781913	32.3862907687805	1.37650608733965	-1.10850259967519	-1.14033821064803	3.8846379638577	2.84500278751248	2.9304886224249	4.71631022879548	5.92575765552456	6.14304739296791	42	96	114	0.00666488962932112	8.71469387755101	0.00328524350071525	8.14245706213927	0.00563097262714611	14.0331632653061	0.00320926973162834	8.37985787079173	0.00871103706788839	3.98163265306123	0.00323306054225244	7.813439546591	0.00613013354667404	10.2857142857143	0.0032462745667006	8.27190037625837	0.841297337611518	0.660910518053375	56.9330193615908	1268.72893772894	0.7644	2.48527694050947E-05	41128.1543694401	2.10265840603623E-05	34382.9579385429	1.57850434279058E-05	28319.73574045	0.826460298942569	37.3713477851084	60.6069745523091	1364.29217719133	0.8488
222.3072	125.7204	116.9292	7.17557162601001	22.3418312552933	26.1293893415059	-0.262999589656978	2.86657091450256	2.85028997346977	3.85221648980321	10.4467883228333	10.1393977379188	4.48217271538632	5.02291983245163	5.01860176229644	40	117	133	0.0162172428154933	7.39265306122449	0.0042219988836404	6.76690357375546	0.0124821399648293	7.3703231292517	0.00465027390277511	7.04723012113328	0.0156591420241565	4.8865306122449	0.00415316161891206	6.76398771711037	0.0135312563261072	15.3648479800083	0.00423156171258948	6.99992450116905	0.694096089138171	2.17590027700831	59.7963988919668	644.804709141274	0.5776	4.16409856312185E-05	24862.4868421053	2.8134055125367E-05	17954.1779050299	9.73308835966668E-05	48294.0789473684	0.749401583533602	42.4498141263941	81.0116834838024	981.251725969198	0.7532
228.1032	122.1848	109.8824	3.30426236246458	5.0112921447467	5.24425116103338	0.199849083343078	2.26302482030205	2.16669001562983	2.94071435602515	13.3948821113945	12.887029521892	3.73786012510305	4.03083899509535	4.14728768906766	21	49	50	0.0335613494377344	1.25224489795918	0.0557313365470351	5.48189339975343	0.0294112117636171	2.48044217687075	0.0554333826475271	5.69015367635944	0.0339531861724283	1.34040816326531	0.0546935655113084	5.5184515036752	0.0269461166135656	2.01582673885881	0.054793410815502	5.7891959060504	0.587929538455595	3.57588187038556	89.7612797374897	408.553732567678	0.4876	4.23244857370196E-05	23407.3822805578	2.47382977348014E-05	13855.5153234885	0.000153986846749586	82093.9220672683	0.642898796896464	51.5352828989193	107.589955499046	605.904005085823	0.6292
224.1308	181.0648	180.1024	18.1076141818849	38.1242154143531	48.0066736427343	0.0527871657082973	-0.297472928533266	-0.319657380510812	1.63775591130779	1.31374008741652	1.32683833051902	5.51330712877599	6.05393334311961	6.33367291595831	74	104	130	0.00520449812578097	13.2759183673469	0.001784618603708	8.43240416373609	0.0039205307973529	27.6028911564625	0.00177337339099833	8.78726787596853	0.00529579341940862	12.1367346938775	0.00179863134914796	8.41876967076934	0.00422720576130901	21.7442732194919	0.00177870690816029	8.68419946530523	0.831270524592362	0.721896643580181	42.6366542354822	1213.71070857752	0.7508	2.73027020071716E-05	38327.3590836441	2.25295343620332E-05	31985.0094465835	2.06785514910714E-05	26882.831113479	0.860368059892875	35.1727515583259	53.2707034728406	1580.38824577026	0.8984
160.5552	92.1564	83.7948	17.1217216704396	14.4414659588284	16.3214917504498	-0.665205016285508	1.21877393267261	1.22588085400913	2.64077093107785	4.11837708886445	4.1590488828287	5.81501637287794	5.54149363533908	5.72827848111471	90	80	92	0.00581924198250728	25.115918367347	0.00620425219113233	8.49919362975703	0.00477701709935686	29.4132653061224	0.00610908448810153	8.65117100542372	0.00797634319033738	4.30448979591837	0.00689752724629205	7.83547551945898	0.00516635353067701	27.7105372761349	0.00625089899813889	8.63337819853623	0.868857523066207	0.560583207642031	53.1890397184515	1420.19959778783	0.7956	8.07478273025885E-05	12765.5057817999	6.96921136926618E-05	11197.27392449	4.62391060904961E-05	6786.66314731021	0.845128022022536	36.7010643220731	58.9241092086997	1463.86811661268	0.8644
233.1676	140.4116	130.448	9.56875698510522	27.6015033184789	33.5645064912327	-1.06660870699192	1.38104974343705	1.2644250198503	3.41902632235702	3.95548608598697	3.59660126554105	4.94598231266671	5.8505102240428	6.18601944999907	51	121	143	0.013939192003332	23.2938775510204	0.00274731516764122	7.81995617331793	0.0121585624045533	36.6224489795917	0.00272852053366472	8.02931634133162	0.01716518117451	10.0436734693877	0.00288159129787029	7.56851369069912	0.01195132321133	28.8967097042898	0.00279593843694066	7.99303107710342	0.846217743134624	0.773664727657324	62.7398202009519	1274.86039132734	0.7564	3.52663504291445E-05	29350.2252776309	2.91064429095131E-05	25472.8383862222	3.17881691059432E-05	18767.1454257007	0.821631749616742	38.4770420492992	71.6379893668439	1315.80135331078	0.8276
205.1756	109.7632	98.2264	4.28765257920928	24.5019494277496	28.8879065188186	-1.21931419547794	2.78263431828598	2.66330870685372	5.79118459504755	9.80798762308455	9.10970953450285	3.95381471333365	4.86963455805275	5.09735887881446	35	117	136	0.0254240733027901	8.45877551020405	0.00329022927861981	6.2758440076967	0.0215860578925451	15.8890306122449	0.00333446661543908	6.49532383890433	0.0276178259058722	8.21224489795918	0.00337890282994094	6.2199857434351	0.0220599115216639	16.0320699708455	0.00336534905496433	6.48750905171637	0.667887065406253	2.73156342182891	67.811209439528	561.880530973451	0.5424	5.22702977797009E-05	20202.3945427729	3.36007393624439E-05	14215.6921919946	0.000156801791763788	47360.2064896755	0.679453285492322	48.126491646778	83.6241050119332	717.921241050119	0.6704
247.116	168.5232	164.4384	7.55720477425351	20.1373846802409	24.9205097347546	-1.40319492973275	0.187191552280655	-0.18790983758904	4.74238183210146	3.3445786677225	3.0067244011708	4.47868538403231	5.87040964331314	6.15765942174088	40	107	126	0.00632536443148687	11.7644897959183	0.00437248391254455	8.22374237787122	0.00531751816372818	21.0488945578231	0.00428993406658964	8.43051759774147	0.00744956268221574	10.0432653061224	0.00441545818260431	8.00868214259909	0.00532316726978093	21.4977092877967	0.00435882811479488	8.44777121016583	0.840218308848046	0.658817373103087	53.0680272108844	1264.46624803768	0.7644	2.73936081821782E-05	37086.4249084249	2.29387517731619E-05	31289.6019552572	1.82223389828594E-05	24007.3390894819	0.837260266317946	36.5639722863741	61.2494226327945	1432.67113163972	0.866
214.1204	207.9832	213.0668	11.5476189684281	16.3007397918009	17.3379104208091	0.318201095340953	-0.85260312596359	-0.711350863608134	2.49007921261831	3.09562048034255	2.79288061692264	5.46556682535449	5.6621546870747	5.79321248532006	67	95	102	0.00781807580174928	5.75510204081633	0.00935259500314885	7.83521935434938	0.00507998692674351	16.9566326530612	0.00926583997112545	8.43309916962327	0.00633635985006247	8.65714285714285	0.00911204620564733	8.1302076245945	0.0063088040679982	9.93586005830906	0.00928148509065241	8.13074502358462	0.815115856911794	1.21996615905245	54.727016356458	1099.43767625494	0.7092	2.27756824843266E-05	43976.8014664411	1.86949188246058E-05	35616.6895302914	2.67425930722284E-05	55442.5437112239	0.866136651690423	35.2683905483727	70.5809184128399	1605.74721355328	0.8972
241.9768	120.2916	105.3728	4.36663048127501	12.9612101842382	17.1371473752197	-2.04605989610963	4.5795168264897	4.18316184541221	7.62373319500847	26.4617181020221	22.4555884811915	3.60148480476916	4.11721697350387	4.50745422172208	27	99	124	0.0506319033735946	4.1595918367347	0.0150355277300245	5.22187502989044	0.0420867751862646	7.35841836734693	0.0141722771499724	5.51336566751607	0.0521232819658478	2.53959183673469	0.0127336253819947	5.17479633197634	0.0437206765680206	4.91211995002083	0.0146938969999642	5.3606192384439	0.621180844290817	3.81493506493507	110.237012987013	447.076298701299	0.4928	4.04796815292043E-05	24846.0900974026	2.44675525972737E-05	15993.8000939406	0.000161508098824459	88994.6079545455	0.64263990835377	52.4175257731959	137.051546391753	596.557989690722	0.6208
215.3696	178.8148	178.6916	14.1798235475622	39.2762689287055	47.7132150398608	-0.0111663621888687	-0.218802976652973	-0.271781395923482	1.58138162632754	1.24659454269957	1.29439335142687	5.46318674523867	5.93463223352685	6.16628599661511	50	106	127	0.00823923365264473	13.1885714285714	0.00159604228109179	8.10533463747835	0.00729802975612028	19.1139455782312	0.00158478490147836	8.31005727054303	0.0103360266555602	7.72000000000001	0.00159365200602682	7.81013050357311	0.00724274784159948	21.9183673469388	0.00158176948128165	8.32581132733535	0.813785296831488	0.952301719356628	45.0221852468109	1113.65224625624	0.7212	2.82049930374652E-05	37412.9994453688	2.25864742781331E-05	30792.3810750769	3.1281237138305E-05	31069.1769273433	0.824258469189004	37.7230403800475	53.2973871733967	1346.30356294537	0.842
241.264	151.214	142.8348	6.40374140639673	34.5000667245732	42.5025306183055	-1.20544943809253	1.20249178784204	1.06636029047156	3.71670938337082	3.06687971960123	2.73664761617735	4.2667066926147	5.52825830051082	5.92161219131637	36	115	140	0.021244148271553	11.6795918367347	0.00170479857556584	7.22352794718324	0.0192617225461619	15.0573979591836	0.00169988913864419	7.29073069031969	0.0236261557684293	9.22204081632651	0.0017004006067814	7.13620836224549	0.0181923018678354	25.3306955435235	0.00167649187521437	7.44533737969192	0.777162707640644	2.01376720901126	56.8010012515645	897.200250312891	0.6392	3.11392735391821E-05	34015.6614518148	2.31842633639289E-05	27558.3123148355	7.39316205551138E-05	56022.2916145181	0.747230026803708	43.8054495912807	72.3307901907357	950.730790190736	0.734
222.1696	186.8944	188.0304	11.3824090525688	20.4474362363598	23.7349336599031	-0.312848579723568	-0.0608124419626734	-0.186169730206081	2.4695648659374	2.03545168962706	2.09527554146945	5.45583731729063	6.24425913112116	6.46519678022459	51	88	104	0.00261890878800502	11.7914285714285	0.00566050458207994	8.95303294957513	0.00208716564857236	19.8252551020408	0.00554917782084994	9.23876546897505	0.00319500208246565	7.12489795918369	0.00567689958028958	8.6805390302442	0.00228819693862806	16.3348604748022	0.00556203246750837	9.15227499731511	0.891437272330043	0.410860163382989	44.9711677078328	1574.70879384911	0.8324	2.54989571817759E-05	39483.7044690053	2.26230040996322E-05	35351.5968030589	1.12267822589781E-05	15147.0370014416	0.883852479514286	33.9470512268618	50.459319845028	1740.83297460181	0.9292
228.2208	166.4072	164.2256	12.1298659250628	27.5347451079541	33.2511820036521	-0.76648811717189	0.537398143033321	0.445206911436425	2.98480395471781	1.8494158601945	1.7741956207262	5.39351268633303	6.2762897988906	6.6076505173181	65	94	111	0.00492894627238651	9.4420408163265	0.00330604363387583	8.55035530412149	0.00397223089916234	21.6628401360543	0.00324834670449306	8.92692016837697	0.00493127863390254	13.6297959183673	0.00329345544408799	8.73118875812389	0.00374739735161717	22.7617659308621	0.00324746489726206	8.97294064955425	0.867607054500936	0.505236907730673	41.8738154613466	1424.70872817955	0.802	2.91149418130232E-05	35077.246882793	2.48930445892568E-05	30836.7057587098	1.65870734940508E-05	15632.0698254364	0.860334739077976	35.3524150268336	48.4194991055456	1574.44901610018	0.8944
244.898	141.65	129.9156	3.38945364328825	8.89639814756512	11.7300501550505	-1.34161052381131	1.28724040885342	0.988813778374798	4.87391428966253	4.64807793148633	3.49166187461072	3.54617202574731	4.90022282870926	5.32894607878634	20	55	65	0.0188324864639732	2.77673469387755	0.0268755750406671	6.55580096335502	0.0150255680503493	4.38818027210884	0.0258878129903925	6.83833945762924	0.0212491461890878	1.79387755102041	0.0272595579824716	6.37924568725679	0.0158428712456856	4.07996668054977	0.0262012594254715	6.81253451785518	0.754276588023123	1.5312693498452	83.8569659442724	850.706501547988	0.646	3.33887242504908E-05	29763.5393188855	2.49073042718304E-05	22708.642502111	5.34891171532817E-05	43392.5541795666	0.764757704415961	42.2090573986309	99.1284886782517	1032.5766192733	0.7596
241.5024	147.0896	137.6084	7.41789688793259	22.0173379825991	26.4939511858839	-1.20072744198259	1.79098270609599	1.63112460348318	3.86581221331929	5.24872447958412	4.66961426022432	4.60849817290028	5.45652325369723	5.8662340688721	40	99	115	0.0118860474802166	14.4404081632653	0.00440460188408435	7.53891961161869	0.00961441124068646	21.4455782312925	0.00432036259162507	7.84320269428274	0.0135820074968764	10.4448979591836	0.00448670567962278	7.47101223318654	0.00992037713010366	27.1382757184506	0.00427805014736281	7.8159203204698	0.854414000167968	0.622427983539095	83.7860082304527	1336.32818930041	0.7776	3.25193893149627E-05	31254.5684156379	2.73965860459951E-05	27118.8052101063	2.2213782597729E-05	17320.7355967078	0.829430455564684	37.3331764705882	93.3228235294118	1377.73505882353	0.85
224.2996	169.2688	167.5428	10.568606333855	30.5185410293481	36.2224594438313	-0.393776944777888	0.31523340197768	0.226289465846692	2.51241144076682	1.67415514440466	1.64160156956843	5.34103934085787	6.43069963154556	6.74194995156566	57	100	119	0.00408196584756357	12.2502040816326	0.00246396621203403	8.85864851807674	0.00301704440279504	31.0578231292515	0.00238664887313302	9.27795269756539	0.00388238234069144	15.3857142857142	0.00246114755733843	9.00918536363339	0.00319161060373116	22.4019158683881	0.00242222209905899	9.20828472435343	0.870705950078562	0.498761763249133	35.2743932639921	1445.51609707776	0.8076	2.90375782377043E-05	35512.5269935612	2.49350314653311E-05	31275.0249634797	1.69966549784131E-05	15014.9707776127	0.869748513120753	35.0736141906874	41.8576496674058	1629.97915742794	0.902
213.3624	116.416	104.2348	9.23328036182158	8.16596252746729	9.7708786176065	-0.553447452488884	3.85125019677977	4.2860627669964	2.44141442970159	25.930167042104	28.5248301455275	4.94742955624731	4.40765274341641	4.46462345481213	42	80	94	0.0219725114535609	2.25632653061225	0.0210251428587441	6.05819392252727	0.0190552836780972	3.94855442176871	0.0222419705892451	6.25804058445579	0.0220907955018741	1.73183673469388	0.0224145342606781	6.06337443522801	0.0175334760037683	3.03248646397334	0.0222001081944381	6.35657771878882	0.640520617304359	2.47569955817379	69.2960235640648	526.777614138439	0.5432	4.75708948546953E-05	20971.2754050074	3.0164440605242E-05	13618.580797459	0.000118411942218684	51249.0309278351	0.679611623262229	48.8948640483384	82.2205438066465	708.693051359517	0.662
199.8572	168.7728	171.0924	15.9408659789862	24.2559267017362	28.2252486656894	0.367942024388122	-0.34058323753034	-0.408207777179341	2.00106726454887	1.83240547366778	1.87488610044225	5.7968811502611	6.27867642295003	6.48718506780697	73	98	112	0.00267255310287381	18.1632653061224	0.00445825950994855	9.14817024345712	0.00243930480355404	25.548044217687	0.00436938806486127	9.27794597592876	0.00330262390670555	13.2485714285714	0.00452139720587906	8.9139589507876	0.0020626904554034	35.4035818408997	0.00425669118448548	9.48185072490346	0.899963728406659	0.304837952090183	46.349929544387	1644.58572099577	0.8516	3.16686456851257E-05	32050.0248943166	2.84602499964732E-05	28863.6295141172	9.83530219522849E-06	9661.76045091592	0.869887181202056	34.4290702749891	49.4417285028372	1651.47402880838	0.9164
96.7792	68.2076	59.3824	11.3356097039374	11.6712511000321	10.7677003227244	0.729069043322284	0.705167481159821	0.507548691701313	5.64627654360339	5.46716782534049	4.74489353382472	5.39831975159537	5.45898068806737	5.35530712353557	87	84	76	0.00593119533527697	3.10816326530612	0.0086642725454509	7.87115495443014	0.00311321382294412	30.3715986394558	0.00877644780505302	8.76053982616618	0.00338692211578511	27.6987755102041	0.00892714307657072	8.65012611155406	0.00305838831210305	30.4289879216993	0.00882321509163784	8.78608560893394	0.822771898296059	0.653887113951012	55.4909478168264	1186.17145899894	0.7512	0.000179191370708464	5888.84771033014	0.000147246948904896	4870.38054623713	0.000117232520143985	3747.14430244941	0.881194541730127	33.837269214255	68.6333190210391	1730.2159725204	0.9316
203.202	102.3772	90.77	6.40084338193023	6.89432521426136	7.97768763489772	0.00966054502745738	2.18594362059698	2.23466475101104	2.26105756009017	12.0928918228282	11.5588340012338	4.63127932890804	4.48952748958831	4.66734399083215	38	64	70	0.0177772594752185	3.02489795918367	0.0265998639790489	6.5216101201268	0.0143042973992317	7.51743197278911	0.0247543017303538	6.85819522791685	0.0197007913369428	3.40775510204082	0.0260264000971347	6.41238315435369	0.0154629795547148	4.15785089546022	0.0260443610317655	6.72960033025176	0.725030968109381	1.92317793827971	77.7997373604727	740.74130006566	0.6092	5.71285593827636E-05	17410.3447143795	4.11248579066372E-05	12731.9657473832	0.000111961975482712	32665.9100459619	0.738875265339158	43.0656973613355	93.2983306408185	939.835756596661	0.7428
197.4056	120.7052	113.108	9.6888951196718	35.5851302226084	42.0685480614675	-0.49136185106507	1.15071025600099	1.13172841413952	2.21499442477802	2.52617665022198	2.49808680822868	5.03059956452233	5.43556845902981	5.69725775194072	46	117	135	0.0166953769262804	11.518775510204	0.00181747686030339	7.05354493701003	0.0150736527604237	23.9766156462585	0.00187130100495162	7.24012251160158	0.0175023740108284	9.16979591836733	0.00177995947771932	7.03405389429558	0.0138938013645223	15.3660974593919	0.00180230068629165	7.29583567720202	0.738117301334373	1.83925112976114	54.0096836668819	780.728857327308	0.6196	4.88603168336127E-05	22402.5351839897	3.44302744676999E-05	17390.7526414593	0.00010551472941239	32770.8211749516	0.735519976346849	44.3495306460519	64.6631695196024	907.995030369961	0.7244
190.8696	206.0332	212.8052	8.80998273778104	11.7472421342203	12.5586007564537	-1.70567566801941	-1.8788028766884	-1.9199541709377	5.63517358168788	6.22002312170953	6.28007260934008	4.58688824933992	4.78241167807222	4.85741830337915	52	71	71	0.0156381507705123	3.96571428571429	0.00824219263840677	7.17800135157396	0.0135862806006756	7.77465986394557	0.00894013127425113	7.34847815349902	0.0175820074968763	5.87795918367347	0.00908059343863506	7.08811822668388	0.0123718060692815	10.3157017909205	0.0088681811001767	7.49706812968434	0.804891063633399	0.756150902132313	98.3209404045927	1102.02460360853	0.7316	2.47577190929043E-05	40593.7162383816	2.01162035143128E-05	32409.8964414869	1.762778133234E-05	32257.9054127939	0.809008265558985	38.3310810810811	106.852316602317	1270.20077220077	0.8288
222.6976	186.0884	188.334	15.054240407274	23.5912480687224	28.3842499284374	0.0401563821835949	-0.435789482797922	-0.430603028519327	1.65730679638762	1.94257824141071	1.93006861288508	5.65902745884761	6.24025865061233	6.46714389941619	56	95	109	0.00319866722199085	17.8897959183673	0.00484748790722441	9.00142464509216	0.00275999005044193	21.7210884353741	0.00487079295344635	9.15877614801653	0.00384373177842567	8.9004081632653	0.00504391502357342	8.6760994127377	0.00249288743878583	29.7771761765931	0.00476551051613594	9.26953125721194	0.90620017036024	0.361761949390815	47.7300843486411	1675.65885660731	0.8536	2.60727977292441E-05	38768.7591377694	2.37350069857254E-05	34967.3656079467	8.62225515665754E-06	15240.3050609185	0.874395614911641	34.2759669708822	52.9626249456758	1679.67709691438	0.9204
138.2928	93.5032	81.8252	42.4751111612436	26.6368389596063	21.4412743315317	1.01097024005622	0.641571135860386	0.727702467657847	3.00758691039897	2.62712147872414	2.6827154479398	6.92132147080217	6.42656017402837	6.10118883787651	170	136	111	0.00264323198667222	8.51959183673468	0.00111901974962727	9.14289099601452	0.00183264207043366	23.8711734693876	0.00111114457069938	9.61183149653711	0.00178259058725526	37.5869387755102	0.00111722464817127	9.71680770590846	0.00143474163288549	66.3465222823825	0.00109518259438075	9.92447877343049	0.867984818299573	0.51345962113659	26.913260219342	1426.93220338983	0.8024	0.000109173411464213	11919.7711864407	9.46659720420444E-05	10321.6772664547	5.18631397269823E-05	6622.26769690927	0.888542921401546	33.8857388316151	33.8445017182131	1768.69845360825	0.9312
110.2852	91.5632	85.2424	16.2355123405453	23.8737262646617	27.0842618921026	0.965864415003406	1.23662586250454	1.52522783668253	3.51705279657688	3.6279100510731	4.24958735524579	5.82990389914678	6.10948649523606	5.98891808786412	88	113	126	0.0040619741774261	5.33183673469388	0.00214282534608387	8.60875011134535	0.00201088088296545	23.626700680272	0.0022428979014907	9.41082081546045	0.00191187005414407	26.5755102040817	0.0021749308987899	9.49457281088465	0.00174940991024666	38.5085381091214	0.00216396500339869	9.62406915723622	0.842038913080228	0.539331619537275	39.2868894601542	1291.59948586118	0.778	0.000116478011978637	9935.9676092545	9.67575786089621E-05	8508.2603928586	6.64446588088226E-05	5090.73264781491	0.899582636931769	32.978215333054	50.9212400502723	1863.37117720989	0.9548
201.3736	203.396	212.0776	8.34033710589686	9.83361500161563	10.5866509454123	1.16818757672237	-1.03566694226351	-1.09443910244989	5.92911409296897	4.4856740059596	4.40337808128177	4.95631868664187	5.1854462686034	5.25763532082419	66	67	66	0.00721532694710538	7.96775510204083	0.0211492650076326	7.79285679236431	0.00575859595538898	12.5212585034013	0.0206356306426867	8.04150405671887	0.00768279883381925	7.10448979591838	0.0212270250580664	7.66876548278848	0.00541892079188858	14.7892544773011	0.0194338695653453	8.13095019239448	0.869223310452592	0.558011049723757	89.0030135610246	1423.27925665495	0.7964	2.39914277748261E-05	41467.247112004	2.08905428478847E-05	35988.9107137675	1.31775442699201E-05	23447.3982923154	0.84716097739611	35.7453640886477	97.0027137042062	1500.75305291723	0.8844
230.2072	138.3772	130.2268	5.66330894089313	15.270223317293	18.361267978002	-0.684065867615916	1.6825835909604	1.47019307708969	4.43364058047237	5.53986021949946	4.72302725528631	4.45221953183346	5.39688812076216	5.7093346161138	41	79	92	0.0119853394418992	7.83510204081634	0.00793594685568677	7.40768319820029	0.0096827421444766	23.0731292517006	0.00756269054072196	7.74648840073176	0.0108911286963766	19.2220408163265	0.00738197810773789	7.71012074428308	0.00837721891874481	27.7367763431903	0.00721108245509682	7.98917546691064	0.79057446596546	1.29007633587786	60.1509101585437	990.186142102173	0.6812	3.58446769001969E-05	28101.1861421022	2.77879285316941E-05	22687.4783277918	5.0283251421566E-05	32802.5155607751	0.790977177960705	40.0618401206637	70.2679738562092	1163.05329311212	0.7956
181.058	192.8272	198.0972	18.3461013842178	24.7253016191916	26.8218372256637	-1.22449690971699	-1.2923091589386	-1.33442262087635	3.48545421889506	3.60255654129664	3.71608458559216	5.51104862723275	5.71990785546266	5.79689325975016	83	108	117	0.00674985422740525	3.57795918367347	0.00188019894825849	8.15930084974637	0.00585440383636449	13.9175170068027	0.00199369137376741	8.44329666865179	0.00736359850062474	12.204081632653	0.00197843406079529	8.224629904255	0.00523227081038877	16.42690545606	0.0019687001947801	8.5743630292491	0.8274271977211	0.702444208289054	54.567481402763	1203.35812964931	0.7528	2.95967409314544E-05	36069.4187035069	2.48675208534133E-05	29497.7726277084	1.90682246659756E-05	27004.6753453773	0.837084042328451	36.9125174499767	57.1144718473709	1422.00884132154	0.8596
241.0376	141.1216	128.174	9.75750922315731	20.4727627212353	23.9655027904695	-2.35236340317083	1.89405330608623	1.68875699046331	9.9639137865392	5.87333365218585	5.16343082529461	4.60310511080204	5.42163273430804	5.82748711371011	68	100	110	0.0140987921699293	20.6734693877551	0.00523150828453615	7.56205328288898	0.0121018007543151	20.3690476190476	0.0055323896195721	7.63398053935855	0.0143127030403999	13.4951020408163	0.00520279346559069	7.49605586420309	0.0107422615281948	43.1311953352771	0.00487255767344811	7.90320415803902	0.838555231892551	0.828175026680896	80.6040554962647	1236.30843116329	0.7496	3.41715244083171E-05	29666.5538954109	2.82060758091315E-05	25312.4308209247	3.11785110462471E-05	21791.2838847385	0.811710227098773	38.4695062923524	90.270087124879	1276.8334946757	0.8264
239.0868	155.6396	150.156	6.53079365467935	19.7651236231904	24.0576903297054	-0.924631745555359	1.008776947306	0.830493155419627	3.25683483697584	3.10830998804079	2.72552951891858	4.47654663405492	5.8661481036436	6.25253254827849	38	85	98	0.00839416909620996	11.3742857142857	0.00533347712550059	8.09430885723246	0.00729079897265045	17.0705782312925	0.00522757160108854	8.29214739062732	0.00940441482715539	7.0195918367347	0.00535836171771946	7.85441603319454	0.00716781030255865	17.7921699291962	0.00520328168525296	8.32613225473046	0.860217152160009	0.637948717948718	52.7866666666667	1362.74666666667	0.78	3.02178346358843E-05	33433.0656410256	2.55513624282894E-05	29247.4973000785	2.18905781471309E-05	18466.6907692308	0.827351435179567	37.896518836433	58.5431568907964	1354.65760610396	0.8388
239.9652	163.756	160.378	9.34776919697957	21.0675215438361	25.8377536949325	-1.34007676631016	0.837294785918399	0.710905066557719	4.45782094297576	2.8194638476031	2.77750478973358	4.88372379533304	6.06444822972612	6.41910252355312	45	84	104	0.00462873802582257	13.4710204081632	0.00520036379672361	8.54927990485541	0.00392016925817941	22.0705782312924	0.00520477234338183	8.77833957010033	0.00577992503123698	10.5065306122449	0.00520692793359284	8.35132982434452	0.00393300653396363	24.4947938359017	0.00503451368478287	8.81665046037938	0.877227485641458	0.397566909975669	49.276399026764	1495.88661800487	0.822	2.85790745745512E-05	35299.2291970803	2.48351202504266E-05	31230.2600898285	1.25642111149703E-05	12640.7815085158	0.863048895925165	35.0656901908566	53.9862405681314	1596.68486462494	0.9012
226.6832	114.3264	98.9344	6.57039098988789	14.8622697808915	16.659402649555	-0.971158829400055	-0.734106240223833	-0.792647417953029	3.8714213999607	2.0535389503696	2.05629516358076	4.49272811119667	5.17094481463741	5.13268968024438	40	56	57	0.0156927946688879	2.59061224489796	0.0067326240649405	6.9453890387435	0.0138028425655977	4.67389455782313	0.00694412512623011	7.20129487087668	0.0174477301124531	1.48040816326531	0.00665477004860865	6.77674535580721	0.0132727912030268	2.78050812161599	0.00670080781613625	7.15983190899715	0.757185281337483	1.60147601476015	63.0934809348093	863.339483394834	0.6504	4.75051923876882E-05	21345.7011070111	3.6222703778677E-05	16026.3261217278	7.43079559571235E-05	35171.6746617466	0.76796361587607	42.2542194092827	70.9061181434599	1040.82172995781	0.7584
225.8584	164.7716	161.8536	9.44008206743988	16.3221883777881	18.5269578463384	0.152465373379935	0.504592775464195	0.45282205006197	2.18011792924777	2.98461760123572	2.87407893284552	5.12905189706823	5.94232691924061	6.14257564348826	48	89	98	0.00300741357767601	19.4502040816327	0.00716731961024368	8.9040634414787	0.00259115125642089	27.9825680272108	0.00684652331911112	9.10851374128952	0.00389237817576014	11.9102040816326	0.00742486382130984	8.62000439352791	0.00255013139221978	32.5147855060391	0.00676944966266693	9.12549773492239	0.912544059556366	0.20510483135825	58.845031905196	1747.91431175934	0.8776	2.96962022431816E-05	33805.8769371012	2.69211275699385E-05	31054.6797250076	6.56458863425563E-06	6388.73655423883	0.892563900179608	33.4749362786746	62.2073067119796	1805.33389974511	0.9416
243.986	140.326	129.4864	4.49125862092131	17.6701704575819	22.2232359263902	-1.84987265170798	2.5010784321431	2.32700063890237	7.52757664556148	9.15231971685986	8.1280525137724	3.84762945107466	5.13414858418975	5.46103070658803	33	98	117	0.0177512703040397	9.9873469387755	0.00720673014009746	6.73770012536343	0.0149312063260677	13.2789115646258	0.00694033004140767	7.00510297308694	0.0215603498542271	4.42530612244898	0.00653172390352536	6.61769616935669	0.0148641731084905	14.3590170762182	0.00701286419692394	7.02910614367345	0.763381554038127	1.15751789976134	78.4057279236277	904.680190930788	0.6704	3.37996040656825E-05	29921.076372315	2.52507809603014E-05	23426.3109449352	4.21246823460745E-05	31483.9397374702	0.771598613742149	41.5298701298701	91.5163636363636	1066.71012987013	0.77
180.8184	174.6204	176.2496	11.7986025206378	19.8183022441379	22.1978399814036	-0.364865804717098	-0.92337822149396	-0.989409006488222	2.86263122166319	4.036343700072	4.16741756078956	5.51662619918373	6.09889779911222	6.21409439101378	71	105	116	0.00215443565181175	18.430612244898	0.00399262987797948	9.2473733355678	0.00188868064232498	26.6556122448979	0.00391324822573895	9.43815017462598	0.00300907955018744	7.13755102040817	0.00398104624402624	8.8116156310708	0.00196346760278454	22.5955851728447	0.00396363369104557	9.33245691889793	0.910032110091743	0.229357798165138	41.0183486238532	1725.9128440367	0.872	3.25129604897046E-05	31427.6770642202	2.95993730569597E-05	28581.5146629715	7.422475629659E-06	7245.91743119266	0.890513814196467	33.3840610428148	44.7761763459093	1797.07545570157	0.9436
241.4604	133.944	121.1436	6.15165277303588	13.883200783681	17.1738807216075	-1.19826180732293	1.49909715883207	1.21542474427383	4.78336171849807	5.5696661628365	4.58269023634505	4.46725462718441	5.4658507258202	5.82103233368506	40	82	94	0.0095550187421908	15.6028571428571	0.00956994414728007	7.78708744061685	0.00889205597204847	20.7070578231292	0.00942597440670432	7.88572431735129	0.00967296959600172	12.8869387755102	0.00956480831769243	7.82000988385348	0.00667759390133334	33.295710120783	0.00857203533945962	8.3049371312789	0.842742617269562	0.969860064585576	68.4241119483315	1240.97954790097	0.7432	3.60859480568476E-05	27782.6948331539	3.0013550271967E-05	23740.1074122582	3.81103069192006E-05	24435.1926803014	0.803265593093964	38.9686274509804	74.2254901960784	1232.66568627451	0.816
245.9404	126.1784	110.354	3.07090342407572	5.47402716836517	6.67292169892619	-1.67603706253636	2.67732204442416	2.80896167413902	7.64704757775383	15.7320305588001	15.1876167013587	3.40963789706819	4.05413608646683	4.24074499946637	27	51	65	0.0362908788004999	1.56285714285714	0.0686102206075225	5.49751985986383	0.0327164028876855	2.47363945578231	0.0703233646758621	5.62808363671386	0.0382543940024992	3.33959183673469	0.0625429126962543	5.54361449610399	0.027635819519182	5.86380674718867	0.0574191755128392	5.94541859310273	0.66362964644266	2.56308579668349	131.883922134102	573.083633741889	0.5548	3.82913813241406E-05	25866.5955299207	2.52308779230315E-05	17301.1769469945	9.98373709853525E-05	65040.8060562365	0.655142305126705	49.9480840543881	142.111248454883	646.798516687268	0.6472
232.1064	177.6396	176.9648	11.7435207259152	29.6667374653837	36.3978620383121	-0.154849076484347	0.075946491873133	-0.0492308737790278	2.09670162340049	1.7587214447968	1.77704196170088	5.38487915552981	6.5131542607267	6.7482120403639	48	106	124	0.00367780091628494	10.4983673469387	0.00273480978330954	8.94550563420965	0.00270756687028549	26.9455782312924	0.00262505501740688	9.35287407203436	0.00357784256559773	15.3595918367347	0.00272172490754832	8.99966447616401	0.00310973440366806	23.5951686797168	0.00267366390866025	9.23356794933788	0.870688001504513	0.584754262788365	33.074222668004	1429.59879638917	0.7976	2.65482645364674E-05	38533.9754262788	2.28839008047533E-05	33783.4534509779	1.79809875102697E-05	19640.1489468405	0.875207453887925	34.5588621444201	39.4954048140044	1674.40743982495	0.914
237.2668	154.7216	149.9388	9.6468242318392	17.6198777929928	19.7755367704647	-0.67194386897315	0.754499261147821	0.634505688305869	2.98088696819336	4.01137705983903	3.78073558789698	5.1680446254233	5.9906379053395	6.20297850042941	49	99	111	0.00399233652644734	18.3628571428571	0.00475555310815479	8.82377402289326	0.00302969827386731	26.4268707482993	0.00455838094065372	9.11578109142332	0.0045201166180758	7.74734693877552	0.00489926199516269	8.59145744906318	0.00323636496732497	24.3790087463556	0.00465925432879633	9.05071697820101	0.896646746251742	0.347846663511595	47.9947941315665	1618.01183151917	0.8452	3.12026836948816E-05	32508.3828679602	2.78003983251091E-05	29360.646738635	1.15019882732573E-05	10515.7482252721	0.887545703856092	33.7274283269148	54.99486521181	1768.7971758665	0.9348
229.0272	146.1336	143.8084	3.46480304779363	12.6546651887752	14.8461338213018	-0.210826473635573	-0.869645263834987	-0.928049728435492	3.22131789719373	2.94091328545166	2.99433724237659	3.80990481663185	5.34316251385053	5.56945348059036	24	59	68	0.012982257392753	2.44408163265306	0.011548489975325	6.96380012176847	0.0104669206117821	3.15603741496599	0.0113133979067199	7.21244602403667	0.0159470220741358	0.917142857142858	0.0111161864776581	6.68410935484595	0.0114600660109516	2.9783423573511	0.0114558737337602	7.14776315430223	0.775863904853129	0.941379310344828	64.716091954023	971.379310344828	0.696	3.45952446162279E-05	28985.1091954023	2.70095481498897E-05	22371.4615411877	3.12985989528528E-05	28169.4183908046	0.773404017005707	40.7211440245148	73.1787538304392	1089.79673135853	0.7832
220.1404	95.2136	78.8032	3.84446197015915	6.95902112656658	9.66733002229675	-0.672199481941324	0.742733573171252	0.730561756743917	3.27975785357855	3.66620302353633	3.35887105907963	3.90357626715487	4.72067564299954	5.14885939613696	23	44	58	0.0141917534360683	1.89836734693878	0.029617451134055	6.65684180798914	0.0117341154148734	2.84651360544218	0.0293294390529739	6.92276775680776	0.0174357351103706	1.07877551020408	0.0307312846010901	6.33348880206491	0.0125438848626344	2.38983756768013	0.0300322025236371	6.80575457631471	0.760150388794882	1.28277945619335	85.385498489426	885.651359516616	0.662	5.7557800972065E-05	17241.9498489426	4.34878042592194E-05	13187.6995517128	7.57536102734891E-05	21525.1909365559	0.760100062771161	41.344398340249	96.1908713692946	1034.45435684647	0.7712
248.1252	132.6168	117.146	1.84605659718222	4.7815852768721	6.42232699260945	-1.22913778809661	0.891172755780671	1.16884702964776	9.6708001519704	3.64095814467586	3.85065550712388	2.81386481947603	4.13693039886221	4.38452732016124	19	33	38	0.0369426072469805	0.624897959183674	0.078427229359361	5.27366288143635	0.0309300378314592	0.890731292517007	0.0785866469821851	5.48514324790193	0.0370159100374844	0.636326530612245	0.0770098191641322	5.27210662144487	0.0292372624831282	1.01124531445231	0.0780045090624134	5.55619821891727	0.552594546208111	3.75968992248062	98.312661498708	352.824289405685	0.4644	3.60356000995517E-05	27472.459086994	1.98452738365212E-05	15235.1841608177	0.000136978958403138	102101.367786391	0.597227739251766	54.5731543624161	120.555704697987	506.675167785235	0.596
241.4028	153.0216	144.9248	10.4243825793185	25.4657796550587	32.7267832968656	-1.23798218354499	1.06302737677495	0.931709266109494	3.23524344921746	2.5949446344925	2.3333223962033	4.48427771471333	5.69919261069646	6.1516564463116	47	86	107	0.0141474385672637	10.7497959183673	0.00382310142059028	7.37542863390047	0.0113693223888192	14.8920068027211	0.00374557480790904	7.60756785519196	0.0145792586422324	3.74734693877551	0.00383813573052338	7.23276845200728	0.0114781065296094	13.1112036651395	0.00378091922654251	7.63736090493036	0.792521240611921	1.37802717070289	47.1925575900768	989.796219728293	0.6772	3.04346269173194E-05	33547.8056704076	2.33932661359671E-05	27399.2790193542	4.81137656116703E-05	39295.4022445363	0.772615637075183	41.7713987473904	57.8475991649269	1065.08559498956	0.7664
129.3804	123.1516	120.924	38.7411266723104	54.9151619995789	59.8213325160849	0.316303180964056	0.37179891444576	0.354610059810031	1.52466885031074	1.59411233630468	1.50468412054599	6.66387026584149	7.09123695175563	7.08403686168158	135	191	192	0.00188821324448142	7.38775510204081	0.000388658826466413	9.54805626893345	0.0010784713545282	47.6258503401356	0.000391539906111884	10.1513967797819	0.0011331945022907	41.0546938775509	0.000395878622944307	10.1100909770419	0.0010725435275216	48.4752186588923	0.000393429419744845	10.1857785426491	0.846017416795999	0.591308846352819	18.9668908432488	1298.9658561821	0.7732	9.65800039148533E-05	18731.8572167615	7.94970596695605E-05	16171.2629354199	7.03166260616078E-05	8965.11329539576	0.916166315968763	32.1862464183381	25.9357347523537	1993.87760949652	0.9772
242.84	123.4856	108.144	4.01497197997695	7.08955517927606	7.67156203129454	-1.74322548793324	1.64829098727388	1.55448514107657	12.0764644126864	8.24944443452581	7.57375165073375	3.86823701027642	4.61209290647804	4.72612242549606	48	57	57	0.0251478550603914	1.94408163265306	0.0359560799066636	5.99879538631253	0.0195260076819845	4.39540816326531	0.0349871304150309	6.33300920514975	0.0213900874635567	3.98448979591837	0.0353343550434545	6.20694410524484	0.0171584413755132	6.3640149937526	0.0336034704871075	6.52714484754068	0.629759973378027	2.89032749428789	79.3244478293983	493.115765422696	0.5252	3.94883819137099E-05	25137.7387661843	2.45337679202629E-05	16061.9171791465	0.000117429166185626	70379.6062452399	0.685761541697641	47.3290246768508	99.2044653349001	742.448883666275	0.6808
236.278	135.854	125.5836	3.72203116590928	9.01864091756624	11.7012055378922	-1.50233673994401	3.326917030736	2.79998106648854	6.44996112105568	17.8406590288938	13.4685573363587	3.68877730696106	4.35454375239025	4.76912882959506	28	77	91	0.0305022907122031	2.63795918367347	0.0238579063106639	5.98764745595278	0.0234458154009906	7.5829081632653	0.022020233023638	6.36279746984803	0.0296409829237815	5.01183673469388	0.0234453223164166	6.06577487979321	0.0240835720088169	6.9316951270304	0.0225899216719388	6.33645312415053	0.682947071296911	2.44271570014144	99.7779349363508	612.553041018388	0.5656	3.60632195835478E-05	27603.7171145686	2.42894705459816E-05	19150.2354153464	9.11384045216016E-05	64748.4427157001	0.720504004835019	44.9966386554622	125.097478991597	858.113725490196	0.714
232.242	175.2684	174.1924	12.2517686886425	29.6217818748299	35.8666667288724	-0.389027132650205	0.177494974875452	0.0923448256634726	1.96535201054535	1.48047277898385	1.47770223826124	5.37912764110135	6.33971658893313	6.65001422147439	51	98	118	0.0039263640149938	12.8542857142857	0.00279271998353397	8.83368369679395	0.00301849055948905	25.2138605442176	0.00276042493588982	9.12713253818575	0.00354652228238241	21.6155102040816	0.00275102890514998	9.02851704541995	0.00272672031523723	41.6397334443982	0.00267351505789606	9.34959228012915	0.887497344755022	0.481517509727626	38.6449416342412	1539.73832684825	0.8224	2.70748790794711E-05	37861.4314202335	2.38170140406752E-05	33850.76667884	1.49582191727533E-05	15866.8273346304	0.870554667167953	34.9496021220159	44.448275862069	1637.67904509284	0.9048
192.1372	207.2584	212.9852	3.50690407054427	4.01343113059138	4.39610975295204	-0.207399835538545	-0.22368739229879	-0.167733344148833	4.11429957956676	3.69944664616313	3.57984626672297	3.80704206691135	4.01845095022552	4.15679911077319	27	29	31	0.0182400666389004	2.65551020408163	0.0640194522682461	6.4907589557588	0.0154941228191957	4.34736394557823	0.0607980012943335	6.69955848622053	0.02101091211995	2.24285714285714	0.0644769285306312	6.25917305625588	0.014369793510652	4.49437734277384	0.0595369490229552	6.79598497492969	0.783305183347911	0.977220956719818	133.178815489749	1000.10250569476	0.7024	2.39876671622568E-05	41344.9077448747	1.87993356432162E-05	32372.4269827994	2.32821436781382E-05	40647.0466970387	0.78830348535382	39.2588932806324	145.447628458498	1172.73023715415	0.8096
222.7872	173.61	173.9352	9.10588360127671	21.8724735683918	25.2834926574633	0.132303413064967	-0.0620751855128631	-0.131245113460409	2.28609105239204	1.89354311282427	1.85918336516005	5.16464041055379	6.31947815134813	6.50008162378949	48	92	102	0.00186955435235317	20.8628571428571	0.00452885453757987	9.39126740068974	0.0015925800592346	31.8014455782312	0.00448956354525327	9.59385380173229	0.00219708454810496	12.869387755102	0.00452639480721954	9.17011942032899	0.00152147489566421	32.329029571012	0.0043959489426824	9.67215479134634	0.918099884468555	0.193490054249548	42.0515370705244	1787.50813743219	0.8848	2.82658569934413E-05	35841.6867088608	2.58755863972106E-05	32990.5082618796	5.79083305433885E-06	6558.64737793852	0.90634503408046	32.6473029045643	46.5029045643154	1915.7510373444	0.964
147.0304	161.2252	164.0136	23.7141281905956	26.1776867763368	27.356209807647	0.732652079327459	0.590046158935457	0.68379773906835	2.32487034975484	2.39261563436119	2.42828833267698	6.04618914376586	6.22101664594758	6.21554328067714	101	112	117	0.0024409829237818	28.8257142857143	0.00152959884296055	9.39540366278272	0.00210777338146145	35.7733843537413	0.00159298088794151	9.56838305345664	0.00285780924614748	8.89755102040815	0.00151883769652505	9.14993271076284	0.0019721409290624	38.0054144106624	0.00151045722148951	9.61102289036528	0.91543589647925	0.244058500914077	39.6846435100548	1757.79981718464	0.8752	4.30391230907763E-05	25297.1841864717	3.9530131217344E-05	23072.4901353005	1.02520870341176E-05	6246.60054844607	0.889042430606606	33.5087196937473	44.0684814972352	1784.35857082093	0.9404
219.0948	200.3376	203.9896	9.84663460071511	16.9358680391647	19.7851229927944	0.150137155035153	-0.972711988431376	-1.01515580651522	2.28426895885239	3.63013330214749	3.71470458891189	5.27347336763829	5.87643595805414	6.03106563005483	53	86	100	0.00391703456892962	11.4	0.00794415001309282	8.56806000431021	0.00277300546068766	18.6156462585034	0.00765946838650979	8.95865646700184	0.00347221990837152	8.7734693877551	0.00768019707965988	8.62995978854612	0.00260841614480708	19.783423573511	0.00766292138322652	9.03191995508022	0.868699594564979	0.431952662721893	53.4822485207101	1443.483234714	0.8112	2.36380939203126E-05	42445.1025641026	2.06236317375767E-05	36723.3321771587	9.74175745960562E-06	19099.150887574	0.870730127585619	34.6019289785182	61.1192459447611	1650.0100832968	0.9124
241.5764	166.57	163.2428	6.26681442520839	17.4015028086657	20.2020753428949	-1.41789311791659	1.14974811533778	1.13879634467617	6.65877760188616	4.10042376350815	4.31718656984611	4.49707658538654	5.89413362311327	6.12650566137447	44	93	104	0.00425422740524782	15.6653061224489	0.00651686941139734	8.60719020389994	0.00377663820630287	22.7414965986394	0.00650281558710304	8.78502563168214	0.00523815077051229	9.60693877551018	0.00674991547340908	8.36494349891863	0.00349344235820109	25.1911703456892	0.00644593035687402	8.86181318282967	0.906549360502128	0.290023201856148	60.0858468677494	1692.11183294664	0.862	2.78076540502946E-05	36138.2723897912	2.50065501535641E-05	33020.9607927301	8.88099276961836E-06	9432.60278422274	0.870009569948086	34.6349275998245	62.9727950855638	1645.22202720491	0.9116
236.742	165.852	161.3212	12.7781781174	30.492459658086	37.9804006108414	-0.672681570790501	0.630099403217638	0.514071795341173	2.34472977307187	1.8230201522722	1.71799944875618	5.3497848033837	6.02379312204646	6.52760354893074	52	99	123	0.00981424406497298	12.2873469387755	0.00264540873405754	8.1160548680785	0.00769897669952354	22.985969387755	0.0025731814498766	8.45545357662904	0.00944239900041658	18.2677551020408	0.00261316552393165	8.35280813934975	0.00715670844492302	36.4135776759684	0.00254248589901991	8.63511416216506	0.854095571411748	0.920508744038156	45.5574986751457	1299.3635400106	0.7548	2.83565376338224E-05	36290.3402225755	2.37738530755108E-05	31532.2334623114	3.04586037682091E-05	28018.1197668257	0.827135550252798	37.6136363636364	55.2679924242424	1360.73295454545	0.8448
186.9712	197.6684	203.5684	27.4774083668748	35.7842317430457	39.8828048341638	-0.862309151918246	-1.09706650879104	-1.30592502443738	2.59764039386176	3.29569267293001	4.13192769494572	5.96233064582758	6.24965455724661	6.45844848350831	107	143	177	0.00913119533527697	5.92448979591837	0.000879404588446032	8.45039818103469	0.00730996054884539	17.2100340136053	0.000921001933857693	8.77265135935771	0.0082225739275302	17.3702040816326	0.000921961727054461	8.63936134206085	0.00665192085555079	28.0387338608912	0.000919542642915742	8.8469674816864	0.806325758028676	1.02598870056497	29.8011299435028	1072.53898305085	0.708	3.0977995596152E-05	37474.6401129943	2.57249383214872E-05	29315.146637243	2.51061330687563E-05	46324.7	0.838478903933433	37.9614469300333	38.0994764397906	1399.81770585436	0.8404
244.6396	133.4896	120.1392	4.24595240670453	13.2165158737089	16.3214896182916	-2.30567279484754	4.51154328844719	4.07524829204092	11.2690571212541	25.3165679518847	21.5910490376205	3.70204129925259	4.05637654473	4.60740794155384	40	101	118	0.0411048729695963	6.38040816326531	0.0109768208226613	5.47140375086411	0.0354738621639128	13.2899659863946	0.0120825668645474	5.62172503416379	0.0429171178675555	9.17959183673469	0.0127018034387522	5.39571617040364	0.0336929236585968	15.4110787172012	0.0120149602159788	5.71871738280232	0.668719237956872	2.64124909222948	128.055918663762	573.899055918664	0.5508	3.59239477549476E-05	27947.0428467683	2.36471314672969E-05	19086.0718868972	9.8443217747953E-05	70091.6913580247	0.669660856512578	48.6590361445783	149.568674698795	692.878313253012	0.664
174.278	133.1044	128.2392	52.7991204093402	51.8353614884665	54.4198160908322	-0.257364256274676	-0.174541925547237	-0.186844890540733	1.46750204222291	1.81526970909984	1.79080925793442	6.95742884949268	7.24572926846994	7.27607335749076	168	196	198	0.0012044981257809	19.3706122448979	0.000380504989545399	10.0548124166412	0.000785986163172734	132.008928571428	0.000371206505191956	10.555894281405	0.000841982507288642	138.550612244898	0.000373152281290926	10.5134624157036	0.000743304062013618	183.254060807997	0.000368688160263528	10.6364674929826	0.912241507024265	0.252413793103448	18.0206896551724	1733.98298850575	0.87	7.47330612237001E-05	24399.5204597701	6.63634718713421E-05	22715.4893968071	2.74404411332287E-05	4098.74528735632	0.927712040294853	31.7760711398545	22.6572352465643	2084.86337914309	0.9896
227.0868	175.0664	175.7536	13.1887249482276	21.6978614393216	25.8565134354963	-0.393259839457221	-0.127355798106148	-0.172545388474442	2.52962302463207	1.79471337804804	1.8012547621478	5.65257923668831	6.25294217965404	6.50212554002523	58	86	99	0.00256259891711787	14.7885714285714	0.00548382621234965	9.01229140360155	0.00214718115137212	26.7725340136054	0.00526240054008883	9.29366944007844	0.00326830487296961	12.674693877551	0.00546783587225878	8.79329427853357	0.0021327709317286	26.3665139525197	0.00526763042919631	9.28972732235533	0.92181169775371	0.205776173285199	49.826714801444	1809.12635379061	0.8864	2.75792693757875E-05	36534.1209386282	2.54122530705477E-05	33663.2141819595	5.79872053567126E-06	7466.2274368231	0.882203414980662	33.8890799656062	51.1719690455718	1733.87790197764	0.9304
245.6196	131.5916	117.2816	2.61971293083803	5.54075892274696	6.45116279751178	-1.23442036457325	6.36279348156057	5.34560331455874	7.84560089623311	57.671732004804	43.832483077365	3.29134970633125	3.51969824076502	3.89847481774113	27	70	76	0.0552133277800917	2.35183673469388	0.057476947913784	4.79395928671315	0.0474653934703131	4.2312925170068	0.0526841762607968	4.99342802952045	0.0583896709704291	2.34040816326531	0.0573529909489837	4.69413608350207	0.04377965518671	4.5551853394419	0.0525635008587085	5.06768425419181	0.60482362826178	3.1563981042654	166.249605055292	445.216429699842	0.5064	3.6576324786252E-05	27106.6176935229	2.19767225651418E-05	16534.3308835605	0.000116853623485694	84258.8870458136	0.62832351943796	51.1075268817204	193.76660341556	588.43706514864	0.6324
247.758	129.7456	114.4436	2.0467134630915	4.04060399445429	4.7031499061799	-0.800231202410353	2.72043629642875	2.59393089906892	5.24008751865872	22.0721356160116	18.9784814155484	3.01876880530287	3.75845580505193	3.95384804445198	19	49	53	0.0394465639316952	1.32734693877551	0.0930355755797241	5.19228525733664	0.0342366751122217	2.32738095238095	0.0879322368515361	5.39194386510511	0.0441399416909622	1.5930612244898	0.0921564483844037	5.07949941537055	0.0328193462358892	2.86214077467722	0.0855954008232097	5.45009916815113	0.605316490574044	3.09004739336493	132.191153238547	445.350710900474	0.5064	3.69690165620882E-05	26772.2780410742	2.22893847226853E-05	16279.7298084719	0.000115341157136204	81854.5394944708	0.632398022732702	50.840251572327	150.622641509434	600.130817610063	0.636
248.6348	137.418	123.1852	2.74602056802202	4.62507037784291	6.13583742939788	-1.83228322689344	5.85623217029522	4.7537124909189	9.51745473997115	51.637456587853	35.3098656303038	3.23648374356111	3.22652642664595	3.80369347117319	24	65	72	0.0660054977092879	1.63183673469388	0.084445906966744	4.55811546684139	0.0586004384747094	3.5858843537415	0.0978207462250285	4.74286342221464	0.0727147022074136	2.54489795918367	0.103846092630914	4.52330110230685	0.0571834136165326	3.64723032069971	0.0978320858349564	4.77885394996606	0.614347917910823	3.25612648221344	190.876679841897	454.367588932806	0.506	3.44988391728469E-05	28715.4822134387	2.10810142229101E-05	17757.3600762632	0.000113001467393625	92748.6561264822	0.645011685166765	51.3126582278481	212.473417721519	612.858227848101	0.632
243.1556	136.6368	123.0844	9.47405872052734	29.8073428161586	36.4755106426216	-2.23657778389854	2.29912389532257	2.23051824796559	7.22253219447964	6.62617133435813	6.31091193031464	3.97183615032679	4.6625861135224	4.88065774130154	54	116	140	0.0302090795501871	6.54857142857143	0.00264841218253068	6.07852066593145	0.0271183303253277	10.9655612244898	0.00259765318559606	6.27443701260907	0.032477467721783	10.8653061224489	0.00264810697587394	6.05262827462093	0.023582600683007	22.6355685131195	0.00260556896077977	6.43514176548974	0.694514744240331	2.07065217391304	104.286684782609	660.298913043478	0.5888	3.54158011183512E-05	29512.1182065217	2.3906611800246E-05	21292.1953913557	8.01306989574137E-05	53393.3899456522	0.679996796593561	48.267184698147	112.274357441721	718.007770472206	0.6692
242.96	137.046	124.6056	4.95645034273521	9.46119886695127	12.1076029270868	-1.89091917065411	2.4972812131399	1.91547026708919	7.54319696430359	12.2045232068863	8.72358349605894	3.943139759691	4.72186251670158	5.19052433080016	38	81	98	0.0214773844231568	7.02163265306122	0.0230124647222849	6.41693183888967	0.018730621500301	8.97576530612244	0.0252595518091003	6.55914947488248	0.0226575593502705	4.37673469387755	0.0218736042674584	6.3139799359957	0.0179203063557614	11.8713036234902	0.0214298999769025	6.64557873457931	0.74461634908963	1.69904153354633	85.2402555910543	803.076677316294	0.626	3.49653060114989E-05	28471.868370607	2.57156411729546E-05	21490.435849756	6.18704308008439E-05	46169.3482428115	0.737152172777544	44.3741721854305	97.0386313465784	912.576158940397	0.7248
213.3088	168.5084	167.682	18.3886226390124	27.8084075315362	32.4568402035688	-0.50381224765546	0.0276358206826073	-0.0258012655454411	1.98793479134109	1.54507552476304	1.58127081463129	5.90748506766309	6.30063778827988	6.61760296031242	75	97	117	0.00387438567263647	20.2942857142857	0.00320143782030581	8.98700005576024	0.00310923689203563	40.0990646258501	0.00308101258287823	9.25101089026395	0.00372144939608503	23.9057142857143	0.00314532059312616	8.98183826677881	0.00290608470266361	45.7530195751771	0.00304643518362143	9.35848461670129	0.876988803783907	0.600400600901352	36.8738107160741	1458.69654481723	0.7988	3.03259899397417E-05	33754.4526790185	2.64066810097651E-05	29779.269801796	1.98838525531514E-05	18548.3194792188	0.874590340604541	34.6377192982456	44.0842105263158	1668.84210526316	0.912
242.3272	162.6408	159.0668	4.91049286324703	12.8369690877559	14.8614648591584	-0.780534464243481	1.11995698382878	1.06510743345608	3.99172996026299	4.88145549215369	4.88020939815779	4.24936580373821	5.53284299689291	5.76330742168667	33	88	102	0.00493161182840483	15.5983673469387	0.010583777502157	8.39390977477832	0.00429436230274432	21.6768707482993	0.0102671686275158	8.55244865672007	0.0075448563098709	5.99346938775511	0.0107253831649184	7.80602190908988	0.00433440807410355	19.8887963348605	0.0102648656430607	8.52981529288765	0.911423371647509	0.248735632183908	74.1834482758621	1729.63632183908	0.87	2.86536856730108E-05	34874.9977011494	2.60301380513139E-05	31893.8469962963	7.44525791992186E-06	8270.01149425287	0.889222615653576	33.6757795813755	78.1345578812473	1779.52199914566	0.9364
188.0656	205.6692	222.5596	2.17983867292972	1.92887826469168	2.08653968090712	-0.140512235976388	0.133336600646813	0.236398295455354	3.93395120486559	2.43050009353915	2.22097660490647	3.11572742666473	2.95329649318792	3.03766867797929	14	11	10	0.0808223240316535	0.364489795918367	0.287818712753648	4.16128167764144	0.0680467339997223	0.548044217687075	0.290661542707393	4.39276125871207	0.0797694294044148	0.390612244897959	0.29511175284593	4.16241813741447	0.0684056570209449	0.526030820491462	0.292802809865414	4.33692502332889	0.433588329439635	9.71261682242991	125.792056074766	180.079439252336	0.3424	2.42013470519106E-05	40929.0408878505	1.04940282675479E-05	17745.8496011708	0.000234561812499117	398342.578271028	0.525616614816937	67.0369477911647	157.955823293173	335.613654618474	0.498
161.1696	178.152	194.7712	7.97310703803731	7.31207877419274	7.30214013560408	0.577206350700677	0.428838568401061	0.54398627311873	2.79053676635975	2.58207716643548	2.69402692114853	4.7874498125211	4.77163228268491	4.76874255351887	39	32	34	0.0191876718034152	0.457142857142857	0.0180110718126745	6.1915294229714	0.0152085068721366	0.999149659863945	0.0191411618470726	6.46272713262692	0.0174117451062058	0.91265306122449	0.0189843895648846	6.2340512098275	0.0154827547386284	1.24073302790504	0.0190133891448351	6.43735586597359	0.468804510630797	5.98898898898899	44.8958958958959	245.474474474474	0.3996	3.25371558131828E-05	30591.7837837838	1.52508576574522E-05	14342.6894085298	0.00019218347754522	186089.083083083	0.656221024938504	48.7506053268765	62.4878934624697	664.934624697337	0.6608
191.8444	208.5872	224.702	3.87104490286538	2.26803795382705	2.30191137970166	1.86444581919892	0.403527635286712	-1.02186161586382	7.5642521725172	2.86050116838791	5.14261693167175	3.63538662928927	3.18159552663158	3.13705103870738	27	14	17	0.0673909204498126	0.421632653061224	0.171747517680569	4.53602782837246	0.0545703613077883	0.72406462585034	0.168563813699342	4.83875458353591	0.0638117451062058	0.508979591836735	0.171396856043557	4.61981840513932	0.0557571718433993	0.698458975426905	0.168773522132091	4.81492352133308	0.464212370661289	8.29794149512459	105.528710725894	216.419284940412	0.3692	2.34203239648485E-05	42313.7551462622	1.08423245012429E-05	19699.3533356323	0.000195205201563285	349436.461538462	0.546265850071912	62.5760787282362	141.610143830431	382.333838001514	0.5284
170.49	191.664	209.1764	6.18840043953201	5.44285807274083	5.04290422673285	-0.106811708009585	-0.132349047469914	-0.133343558462804	1.96616856232375	1.78073749769202	1.89905595904214	4.49503153654063	4.16795495235279	4.22520079520898	26	22	22	0.0303200333194502	0.338775510204082	0.0319126669225394	5.4790299377825	0.0239913780137906	0.600765306122449	0.033047366652627	5.73546949828697	0.0261860891295294	0.523265306122449	0.0329126167874706	5.55944175194193	0.0233903997726895	0.698875468554769	0.0328931454471929	5.74107297269468	0.41831750963503	12.7421777221527	43.1226533166458	161.117647058824	0.3196	2.84358517681287E-05	34918.8260325407	1.19077074730978E-05	14593.0549375345	0.000356597674496024	452049.753441802	0.522048837027254	62.8912710566616	65.989280245023	353.336906584992	0.5224
191.222	209.8296	226.666	2.83942177212192	1.87802125653572	1.90222080737227	0.201043729241281	-0.0651097532841764	-0.336108193876609	2.32555130885588	2.6622627037046	2.70957362683254	3.49828502787736	2.94389626235355	2.93268434119714	14	10	11	0.0697569346105789	0.353061224489796	0.237910065706013	4.27985854319284	0.059136601068999	0.524659863945578	0.239337912426711	4.50566370288863	0.0727733444398167	0.362040816326531	0.245210850277926	4.2371790318006	0.0600119587822719	0.496043315285298	0.239616626380922	4.4666883988331	0.393197755787133	8.89547038327526	120.409988385598	176.737514518002	0.3444	2.33000926900176E-05	42520.2740998839	9.15915672483183E-06	16722.6222940328	0.000207261739308102	378247.452961672	0.489949433575548	66.4586345381526	147.55421686747	310.399196787149	0.498
191.956	209.4064	226.5604	2.12651451911338	1.80478226941645	1.73941134870392	0.174808298184237	-0.23446833394252	-0.306564447297583	2.1489945004485	2.10586052339456	2.55780404126217	3.05196068372306	2.80584281626166	2.80357497300657	11	9	8	0.0864856309870887	0.34530612244898	0.319322420439728	3.94159320404226	0.0715149792910361	0.517857142857143	0.319090992056872	4.18257131344423	0.0824166597251145	0.389387755102041	0.319434895569202	4.00636187268571	0.0731496195618895	0.495210329029571	0.317476049833208	4.14778690379971	0.442146056368013	11.2240762812872	133.88200238379	177.915375446961	0.3356	2.32724542973103E-05	42568.4469606675	1.02717132102785E-05	18854.9785002904	0.000262261744218805	475847.865315852	0.50268496367018	67.2621359223301	170.860841423948	315.077669902913	0.4944
191.5612	210.152	227.1956	5.34900500654094	3.54819616143189	3.20445637199198	0.345074653866738	0.603124199287113	0.434757559113617	2.15285958383272	2.94938164435035	2.51633493906813	4.3128378338529	3.75689771773532	3.63866772616986	23	18	16	0.0305369429404415	0.957551020408163	0.0607665583945055	5.67058540252696	0.0247780872553103	1.30442176870748	0.060722080677735	5.89262447565642	0.0345136193252811	0.56	0.0632868427953062	5.38465517151527	0.0258897054729209	1.27197001249479	0.0612024589849767	5.84302622517546	0.650909731266751	3.60761460761461	94.4965034965035	508.139083139083	0.5148	2.29828007607547E-05	43154.7684537685	1.48264352011004E-05	28337.2516340218	8.57290487489472E-05	150480.163947164	0.663165546592647	50.3552386856789	106.599504029758	660.443273403596	0.6452
190.308	209.478	226.5252	2.54140433618895	1.71415168523675	1.78408658982685	-0.238395776177168	-0.501270834050914	-0.0579620366560649	2.33352719644747	2.80947744296825	2.84615467116523	3.32934703386043	2.76249779471505	2.8651545591326	13	10	9	0.0865106205747605	0.35265306122449	0.302036832577116	4.03023086559812	0.0744351311953353	0.509353741496599	0.312313214801617	4.21473107676013	0.0874369012911287	0.373469387755102	0.314969188508569	3.99849898644724	0.0753915009381937	0.506455643481883	0.309599080073288	4.19392372221055	0.409496732004342	10.0478468899522	146.074162679426	168.519138755981	0.3344	2.33786482948175E-05	42372.8349282297	9.5577550980917E-06	17379.9212910047	0.000236173640497677	423500.982057416	0.460139749099182	69.9427609427609	174.851851851852	272.715488215488	0.4752
174.2744	189.4072	204.772	11.61519283697	10.5690391313496	10.5566668982212	-0.00218603602233263	0.0829501215195889	0.087284084838458	1.73369233158029	1.68462746978709	1.6336807597319	5.24179332971171	5.11780450994106	5.07022860858608	42	38	38	0.0124761349437734	0.607755102040817	0.0086891319561656	6.71270349486558	0.0100236735850803	1.40051020408163	0.00890674107171779	6.9981953593269	0.0126860474802166	1.03142857142857	0.00888615260410338	6.63357877716984	0.0107492001892173	1.3298625572678	0.00890306440385361	6.87565449502913	0.584426209444988	4.22203098106713	36.3614457831325	379.359724612737	0.4648	2.84571711898537E-05	35222.1187607573	1.64241203487787E-05	20833.2083998402	0.000121285362756795	147229.548192771	0.667888402610534	47.5885139135583	49.4783895796329	703.215512137359	0.6756
192.882	210.5452	227.3764	1.79178012043889	1.98775173500113	1.96415962691427	-0.019582635163659	-0.311407489339285	-0.104689657145855	2.60359110298205	2.29484241484379	2.3351412104758	2.87355925670129	2.93991834844119	2.96730458910835	10	9	10	0.094665889212828	0.357551020408163	0.307767524876954	3.93429873032008	0.0771777673654496	0.517857142857143	0.29563167786613	4.17334706438534	0.0922249062890462	0.368571428571429	0.309785214690908	3.94506519173821	0.0793701291683789	0.503123698458976	0.300190530985205	4.14782312939292	0.418491586898937	10.7901234567901	139.303703703704	159.506172839506	0.324	2.30573323478722E-05	42966.5382716049	9.64372202069952E-06	17991.5210689435	0.000248971458758431	463275.52345679	0.515306336545705	67.7154471544715	181.894308943089	321.089430894309	0.492
193.2992	210.7168	227.4912	2.16612080918863	1.56096052480516	1.55058781112196	-0.139634923583796	1.22866012761386E-05	-0.316708512325663	2.53201497473851	2.80765920134392	2.82831350928575	3.13203755061383	2.67917066670676	2.65530761495714	12	9	10	0.0893271137026239	0.385714285714286	0.38910756908502	3.95682382113081	0.0712145402378639	0.61437074829932	0.368885851824122	4.26179908914917	0.0863420241566014	0.417959183673469	0.387609743348033	4.00619912751426	0.0732526586780706	0.543107038733861	0.376936266485346	4.1820061363226	0.428125810499431	8.43665158371041	154.212669683258	187.64479638009	0.3536	2.30123917581153E-05	43048.8902714932	9.85087632431918E-06	18433.1948232908	0.000194328537520429	362836.316742081	0.51225088019475	64.3661202185792	197.952380952381	337.473067915691	0.5124
185.568	206.2976	223.5896	2.28485798245755	1.78444227701543	1.83749063671084	0.460090682062169	0.574218813946254	0.49588754313676	2.35630380981361	2.60443614602215	2.98693995350509	3.12143758101111	2.76523084404427	2.87293461922583	12	8	11	0.0864639733444398	0.332244897959184	0.267074106572831	4.00652270008499	0.0732753135267712	0.486819727891157	0.268424338129485	4.21216446313877	0.0880766347355269	0.341224489795918	0.275575929053316	3.98877950970479	0.074875958424237	0.442315701790921	0.270342865041058	4.16825225595081	0.412795552828204	12.3109452736318	127.164179104478	162.072139303483	0.3216	2.42875804288953E-05	40783.0559701493	1.00222139360835E-05	16841.6269560249	0.000298337069178328	503196.447761194	0.479732604719473	70.9338983050847	160.010169491525	280.079661016949	0.472
173.0844	193.3272	210.6496	5.97317977630006	4.76732001862682	4.57991482890239	-0.255153085199545	-0.109219663169875	-0.0346947628968959	2.11361849479717	1.79783924896799	1.88276783720558	4.48246476628016	4.09373858634034	4.07466122806963	26	20	20	0.0281735943356934	0.468979591836735	0.0386415989814165	5.59385864631022	0.0238088007311768	0.734268707482993	0.0399440639728994	5.78573619622891	0.0280399833402749	0.507755102040816	0.040045063825384	5.48484775236471	0.0232825035937927	0.758850478967097	0.039906592117483	5.79448246528754	0.510157119256409	9.03846153846154	54.9358974358974	244.388888888889	0.3744	2.76610070963834E-05	35873.4797008547	1.40820996976193E-05	18337.3822146351	0.000250018363822055	324269.216880342	0.568000843179285	58.1052631578947	74.9473684210526	435.701280227596	0.5624
187.8216	205.7128	221.7688	3.8133677294486	3.25525976843631	3.06948636745629	0.783920318733308	-0.0103371311279305	0.0527553918177963	3.24359684797027	3.09938543993732	3.5177467404619	3.74377498369185	3.70119062942833	3.62275014556996	23	19	20	0.0492308204914619	0.523265306122449	0.0928104128403469	5.10913121790839	0.040198817622287	0.846513605442177	0.0935571342058508	5.37785247225605	0.0510950437317784	0.48	0.0956268117626768	5.00976171978627	0.0429515259936986	0.695543523531861	0.0952419971890018	5.25228032728232	0.536715612887791	5.62251655629139	95.5298013245033	301.368968779565	0.4228	2.41097703011209E-05	41117.0189214759	1.28771051430416E-05	22177.5027599849	0.000137233185881451	228255.110690634	0.629405512525192	55.6874154262517	124.021650879567	546.342354533153	0.5912
192.182	209.6324	226.5796	2.11737478968651	1.9096780461638	1.96765440054904	-0.0310022354993922	-0.681895530780707	-1.54452727788275	2.06992120109686	3.38872268654853	7.8717414294637	3.03759198757936	2.87080388358076	2.82545458443424	11	12	14	0.0852288213244482	0.354693877551021	0.287951871090993	4.04576394851479	0.0673420941505854	0.592687074829932	0.276368181605905	4.35118919466996	0.0809186172428155	0.408571428571429	0.283226474453089	4.12226270644724	0.0715401971377676	0.502290712203249	0.283089969443686	4.25540557764855	0.440002457144666	10.7764705882353	128.282352941176	181.708235294118	0.34	2.3256197990088E-05	42600.9011764706	1.0226993974305E-05	18755.7996574501	0.000250679601886858	458930.12	0.524985508422007	64.5728760717069	172.46687451286	349.531566640686	0.5132
191.384	208.6268	225.378	2.50066871056524	2.25573087047192	2.37804877998749	-0.00709033390855336	0.0612363439727825	-0.586081844554744	2.47446892292278	2.33831210116175	3.5660968417653	3.25827138482982	3.14879179365609	3.24083426784038	12	12	15	0.0631873386089129	0.399591836734694	0.194682692944158	4.48458013431003	0.0523248415012263	0.67984693877551	0.193249733233211	4.80695304337683	0.0627675135360267	0.447755102040816	0.197876625328791	4.51536824021611	0.052587938421465	0.593919200333194	0.195384191925529	4.70788886691209	0.456027086645183	9.02888888888889	110.897777777778	204.711111111111	0.36	2.34650259510859E-05	42224.7744444444	1.07028231497182E-05	19251.9283933957	0.000212622278338283	379858.526666667	0.546320147033382	64.0980694980695	135.021621621622	371.522007722008	0.518
189.0392	205.9952	222.7868	2.17275478598023	2.32275202292453	2.62384179401122	-0.289202811366185	-0.259814726014121	-0.0916827644094788	2.80046962987135	2.86137585310176	2.45057805356448	3.13882273903076	3.22441278216616	3.38731699020462	14	14	15	0.0646830487296959	0.379591836734694	0.198663209027063	4.4464468634754	0.0526690267943912	0.636904761904762	0.203375236145482	4.73492414025298	0.0631613494377343	0.45265306122449	0.203630784872378	4.49590032031596	0.0535163312662484	0.602249062890462	0.202270458591132	4.675122229485	0.45351076353749	9.2633371169126	112.230419977299	194.975028376845	0.3524	2.40470176246428E-05	41198.3257661748	1.08935722143807E-05	18704.3663918049	0.000223006037974871	381176.203178207	0.52940661802568	63.9312741312741	143.534362934363	358.800772200772	0.518
157.7228	175.7952	192.8104	7.94614121193426	7.38726315762475	7.42100073035976	-0.447278712886817	-0.321601752841665	-0.295805843404767	2.48289239538872	2.53243018651815	2.35097919302912	4.86606961814012	4.83399353069254	4.80793545965901	40	37	36	0.0177669304456477	0.45265306122449	0.0178995510675328	6.25819347409579	0.0145204978249803	0.96938775510204	0.0190483899464879	6.46132261840702	0.0166364014993753	0.890612244897959	0.0188439985026357	6.29035640670471	0.0144808120870087	1.17076218242399	0.018905416881156	6.51265969185417	0.479319263422867	6.29588766298897	41.938816449348	251.615847542628	0.3988	3.3709853853474E-05	29549.44332999	1.62962332373516E-05	14052.2150163497	0.000208261939084219	189694.294884654	0.640528965164544	49.2322738386308	58.4449877750611	634.254278728606	0.6544
168.4144	189.8448	207.6924	6.19821527861045	5.6232297623341	5.2105452920016	0.0486058616982456	-0.00377512918537809	-0.0420730878470829	2.04982864940613	1.87651051369879	1.86679801897239	4.53658474841221	4.29608629640066	4.25962718034981	26	23	22	0.0260231570179092	0.383673469387755	0.0305658453256418	5.67671196741439	0.0211955955851729	0.668792517006803	0.0313469131743974	5.91609390695985	0.0233909204498126	0.554285714285714	0.0318054338605681	5.70501604228076	0.0206426900078598	0.721782590587255	0.0316210390914962	5.88932367688603	0.43840502146281	9.63594470046083	43.5046082949309	188.615207373272	0.3472	2.90466528951563E-05	34183.5760368664	1.2793124570539E-05	14917.2082971216	0.000275476530578535	334744.693548387	0.535547798641227	60.5940740740741	63.7437037037037	381.718518518519	0.54
163.0788	184.606	202.3752	7.67300401146774	7.68876869205987	7.80804872935614	-0.34816517966574	-0.506837817606055	-0.40374330579908	1.93387597307945	2.53438005042126	2.125407315393	4.68004443906122	4.72473527286067	4.73260244170333	36	43	39	0.0186755518533944	1.13510204081633	0.0168753538982883	6.30831763711027	0.0170671797630617	1.26360544217687	0.0171537603834103	6.39593992736219	0.017724947938359	0.894693877551021	0.0177566865417101	6.26128226173062	0.0141147977180826	2.08621407746772	0.0173180475823031	6.67101612683629	0.592035063317026	4.578125	46.1423611111111	382.788194444444	0.4608	3.10107954412155E-05	32138.6449652778	1.85417736126851E-05	18850.2721291323	0.000137415012503791	151833.014756944	0.628853609536948	54.0404241219351	58.974817760106	556.199469847581	0.6036
189.2764	208.6812	226.1808	4.27747624657344	3.17558916738296	3.07481891499321	-0.641525287943382	-0.627261843212079	-0.76190379978337	2.5197291116239	2.26217734420955	2.77171348226891	3.9311658637718	3.40900433613754	3.47134096868712	20	14	15	0.0576529779258642	0.395510204081633	0.0826476085757366	4.75821233378367	0.0490116965153408	0.59906462585034	0.0820762822697074	4.96684035704787	0.0598620574760517	0.424489795918367	0.0843286671533505	4.73311772925926	0.0496719661268446	0.604748021657643	0.0828885883710078	4.98703363243657	0.434075606648245	7.7304347826087	92.5739130434783	207.726086956522	0.368	2.36443658665059E-05	41932.052173913	1.0286825796177E-05	18161.7863543279	0.000182302581938508	325000.80326087	0.521926501512039	63.7555898226677	122.128758673863	353.629144178874	0.5188
182.9724	200.4732	217.3636	9.5963137839485	9.45192476482965	9.22905168692862	-1.50476391147556	-1.5699989862627	-1.54223242246241	4.0406431324527	4.38467474913326	4.3475256851067	4.43283378306976	4.46039375720465	4.49297611056524	41	41	42	0.0285231153685964	5.67183673469388	0.0108203167552518	6.48154369668281	0.0233637460086075	10.1670918367347	0.0104410117918871	6.75868714736137	0.0330915451895044	1.29836734693878	0.0112229858655281	6.06309394450053	0.0262331691935246	3.23615160349854	0.0109944380843874	6.4476940433711	0.746814782850981	2.74520547945205	66.3493150684932	755.064383561644	0.584	2.65152038143795E-05	37785.6773972603	2.02561959078908E-05	27588.6643279063	6.65338605759443E-05	112284.923287671	0.745867694756379	45.9346961953436	83.9903463940943	912.664963089154	0.7044
184.1756	201.1704	218.1616	4.10784184700434	4.39569833359843	4.10797826673901	-0.536698230717718	-0.38635036693949	-0.449307573131355	2.29705579494685	1.8000632156551	2.0376635409856	3.83748404196933	3.83017349018609	3.85200676051876	19	17	18	0.0482169096209913	0.352244897959184	0.0561860078230335	4.98119238892727	0.0396691627331204	0.612244897959184	0.0573605903649794	5.24680268804038	0.044539775093711	0.490612244897959	0.0575510221225967	5.06495251131859	0.0390433251728897	0.629321116201583	0.0574248407549166	5.21821319673496	0.427634087180392	10.1050767414404	66.9173553719008	176.204250295159	0.3388	2.53347744505167E-05	39143.4757969303	1.08701370826869E-05	16683.7405643623	0.000255005921502339	397269.53364817	0.532246695396696	63.7596302003082	93.7611710323575	361.169491525424	0.5192
150.4092	163.95	178.416	10.7979329207029	8.40401689669886	8.23376851751372	-0.187092189949751	-0.149467857799893	-0.0386137178495031	1.83712060780478	1.71086072138258	1.89058459769793	5.221217266725	4.7971821335245	4.8463582795775	41	35	35	0.0171005414410662	0.526938775510205	0.0133829149229064	6.31910091803649	0.0131354412513304	1.13562925170068	0.0136238817607182	6.66414845182831	0.0154918783840067	0.907346938775511	0.0137126124237777	6.39819492049396	0.0138271902187083	1.16076634735527	0.0136959020931155	6.5537350495416	0.51938450794467	5.4537037037037	39.4666666666667	302.701851851852	0.432	3.78324011243349E-05	26392.4518518519	1.96249154954342E-05	13726.7217939596	0.000216768733124702	137255.027777778	0.665887621495282	48.7272178636089	58.888955944478	684.774290887145	0.6628
171.5188	192.6756	210.5448	5.55417379634451	5.16782010522812	5.12007743691441	0.0385970818126193	-0.150098355193087	-0.181897760150611	1.80645421803594	1.74109299455528	2.0404182533651	4.28360091530525	4.15769599382442	4.27018952873202	24	21	22	0.0302034152436485	0.414693877551021	0.0360785257587222	5.47960819494959	0.0250177877273358	0.718112244897959	0.0365478505819391	5.69017962465219	0.0273922532278217	0.538775510204082	0.0371270954583315	5.52645612537124	0.0238729836467902	0.70637234485631	0.0368847814637537	5.73127500335283	0.467730316378169	8.96681415929204	52.4513274336283	210.066371681416	0.3616	2.80946992822533E-05	35322.0287610619	1.32095968023422E-05	16431.4508737177	0.000250552098794866	318578.837389381	0.533461961687942	60.9138187221397	72.4903417533432	380.898959881129	0.5384
177.7936	198.236	215.8304	3.25302920982889	3.23967652706254	3.36987178391107	-0.45303909304618	-0.532861033666477	-0.515275747583174	2.23076183954152	2.50572530782624	2.71629109812831	3.58821798179499	3.59029794901838	3.70242961580204	16	15	17	0.0552359850062474	0.354693877551021	0.0998859048360551	4.72949963075174	0.0456999976861493	0.5625	0.103162360724972	4.92732901183361	0.0535023740108288	0.420816326530612	0.104204146773805	4.72915852030706	0.0462231046657118	0.554352353186172	0.103286481947774	4.94856919119877	0.413811898778343	10.2076372315036	81.1599045346062	169.909307875895	0.3352	2.63246001654643E-05	37637.9653937948	1.08819684049491E-05	15590.5286507146	0.000267421606961672	386013.96778043	0.498496123317707	64.8615263571991	110.169158143194	324.611329661684	0.5084
193.5052	211.0684	227.9532	1.99047053733533	1.22201531905292	1.28926714066558	-0.419430261186511	-0.0872118556103676	-0.30261942799441	2.67580064888581	3.10258932089535	2.87850771961484	2.95614381452986	2.32844536614599	2.39287221363977	11	8	7	0.110953102873803	0.375918367346939	0.527165603573678	3.68021001909628	0.089129167823592	0.607568027210885	0.494813595500107	3.96137254776812	0.110596917950854	0.395510204081633	0.539472367620386	3.68304894652302	0.0947919971565367	0.51228654727197	0.514997940364239	3.85765242647736	0.42956811475936	9.00917431192661	177.706422018349	185.855504587156	0.3488	2.29523210001514E-05	43159.5424311927	9.85497212611234E-06	18549.0839987007	0.000206429873439141	389481.408256881	0.52995500607387	64.0147172734314	233.937257939582	354.694810224632	0.5164
191.1344	208.704	225.4488	2.64172985749868	2.04714044462025	2.0923141637909	0.296233692170104	-0.167552021511877	-0.178591124491713	3.01065652876515	2.61204608863492	2.37586992880848	3.41847495275418	3.02681817644808	3.07193183403374	14	12	11	0.0683058725531029	0.427755102040816	0.241594270982951	4.37265033129339	0.0585266844833171	0.623724489795918	0.247793192835177	4.58612632346654	0.0689532694710537	0.425714285714286	0.237107677275225	4.38842586027641	0.0574505520658909	0.593919200333194	0.237216245524557	4.58418807124621	0.443620391909889	6.25258799171843	131.633540372671	224.821946169772	0.3864	2.34633328465937E-05	42225.2805383023	1.0389532242507E-05	18767.3708353018	0.000147004678440041	263450.675983437	0.530666039640449	63.1624521072797	158.744061302682	360.744061302682	0.522
187.9008	205.7776	223.0244	8.66822700210372	7.76768551371642	7.37882135845556	-2.01702259323764	-2.1873034464093	-2.22595800147849	6.28042276756879	6.98191149762859	7.29483194780525	4.2128160696405	3.94026976116144	3.95523584442042	41	38	38	0.0443698458975427	3.10734693877551	0.0158168896096577	5.56853666803284	0.0377652974455088	4.75297619047619	0.0167878325862434	5.6844565566794	0.0445084548104956	0.670612244897959	0.015816112129402	5.39816703173226	0.0394266861943717	1.90628904623074	0.0160063300398731	5.64953769430238	0.653839032328279	5.35361842105263	73.5674342105263	482.136513157895	0.4864	2.51337681045185E-05	39797.8939144737	1.69471391159919E-05	25263.8646735117	0.000125118758466304	227000.101973684	0.655178840014958	51.6785260482846	102.190597204574	627.165184243964	0.6296
194.5064	211.312	228.0336	4.28340507540438	2.8232350238689	2.50177357888359	0.303332717376616	0.331879437394201	-0.129192501746033	2.55784997916339	3.2835615168434	3.16867245064834	4.0524312439292	3.42449155646991	3.3130837115894	22	16	15	0.0431090379008747	0.733877551020408	0.0995651021456542	5.27272030307538	0.0360479863714193	1.14243197278912	0.0978559149215802	5.52694787896347	0.0494740524781342	0.546530612244898	0.103334269736595	5.0399187399392	0.0374359843470746	0.915868388171595	0.100208710670297	5.39097140705822	0.617613166001231	3.8110300081103	121.918085969181	443.386050283861	0.4932	2.28132708313806E-05	43455.1248986213	1.40612574378745E-05	26892.5533168123	8.74806391925234E-05	164553.610705596	0.652702563083708	52.1582319026265	141.073030108905	616.911595131326	0.6244
175.942	196.0604	213.3364	5.07529664157673	4.55314746521568	4.55930203430306	-0.350980249254778	-0.153906118929221	-0.10579283940877	1.91992822654101	1.8956433613855	1.96957878154923	4.10765554281073	4.06659512112215	4.0756291518377	22	18	20	0.0298708871303624	0.491020408163265	0.0459799650065658	5.49596430680341	0.0257542430237401	0.709183673469388	0.0468686276332685	5.67163379549298	0.0322299042065806	0.45469387755102	0.0474627934666474	5.31781766296686	0.0251795335172888	0.740108288213245	0.0470858897871554	5.68626059068218	0.513558679535451	7.72893401015228	61.7208121827411	264.86192893401	0.394	2.68929630785218E-05	36882.2274111675	1.37955651546513E-05	18959.6082372434	0.000206777820935104	286571.693401015	0.557731781571194	59.2807525325615	79.9334298118669	416.848046309696	0.5528
182.6576	203.4828	220.6704	2.01860403249374	1.61149128449396	1.71469059599684	0.0449511344851588	0.254082125079742	0.15992166520608	2.29563179220117	2.4297837243023	2.70295859771632	3.01711585536327	2.69626619654829	2.78657787158709	11	9	9	0.0922492294877135	0.30734693877551	0.338325554574566	3.87414396827687	0.0766101508630663	0.461734693877551	0.336754954900992	4.11683605300728	0.0904972927946689	0.335510204081633	0.345373716008751	3.89733974101189	0.0800709339316309	0.426072469804248	0.339678598942073	4.05105995327327	0.39942403842831	13.5650459921156	123.105124835742	141.691195795007	0.3044	2.49998701396516E-05	39612.8094612352	9.99954853827478E-06	15799.9937803169	0.000338310008061267	538633.890932983	0.461549007226631	74.2833186231244	157.92321270962	254.027360988526	0.4532
185.0492	200.42	215.364	9.17032057018728	8.8110158324679	8.4483077595457	-0.321857631938465	-1.6320081605239	-2.17478124632407	9.76937778144431	10.756199558349	11.2260830878854	4.44550494991491	4.58003500664906	4.64344664334574	85	79	73	0.0313985839233653	5.59469387755103	0.012801219969826	6.40672563733608	0.0244527019991672	11.7742346938775	0.0125074537787448	6.80553530016868	0.0309957517700957	4.35918367346939	0.0134197636561566	6.40189867414665	0.0263119229961277	7.33111203665139	0.0131470223068689	6.68960704358355	0.686408872146202	2.70503597122302	73.8330935251799	606.969784172662	0.556	2.59735975814476E-05	38582.8820143885	1.81378468647682E-05	26110.8083696344	6.76966432382131E-05	107193.947482014	0.717285555928231	45.9054669703872	95.8451025056948	836.599088838269	0.7024
188.7052	208.0432	225.292	3.69776864608915	2.49297688717726	2.63581789962812	-0.03666714398617	-0.0798735703931261	0.219711924329185	2.09487539254148	1.86768935289234	2.17575455555485	3.83235600857413	3.19362895153849	3.36576603994887	18	13	13	0.0513236151603499	0.466938775510204	0.126488942379996	4.76126879647128	0.0435896935304734	0.707908163265306	0.12776154925494	4.99447982782372	0.0479240316534777	0.580816326530612	0.126892022463998	4.88237987260471	0.0395498474275174	0.922948771345273	0.124570274894668	5.1560392837209	0.502073758629332	7.66192893401015	98.8741116751269	259.375634517767	0.394	2.37501977649606E-05	41726.0010152284	1.19209640095447E-05	20954.8777609864	0.000182965655291571	317959.700507614	0.553510347803414	62.7983320697498	122.510235026535	387.62926459439	0.5276
188.5732	208.4712	225.686	3.82819040278824	3.14648542980895	2.99015116674726	0.696101005048514	0.389254637468716	0.163777539580902	3.94570964234396	3.78655177982331	3.18208603725581	3.87173119553956	3.57182757034745	3.59216205744499	22	20	19	0.0498339025406081	0.515102040816326	0.0976409618660483	4.88406300910759	0.0434946087278448	0.644557823129252	0.09743374244973	5.0532336083041	0.0511080383173678	0.409795918367347	0.094344756081552	4.86984728760287	0.0418156671843486	0.749271137026239	0.097960729402863	5.11399762184119	0.498309381574845	7.70820353063344	84.1360332294912	246.52440290758	0.3852	2.35339073335874E-05	42137.3551401869	1.15963288773015E-05	21242.0653805705	0.00018359531533529	320693.241952233	0.509635860385431	64.970102281668	103.547600314713	332.071597167585	0.5084
193.4816	211.482	228.4012	4.96040940245863	3.23692384834738	2.84004199968944	0.403404857449463	0.562319130123918	0.247596790538277	2.16340621823912	2.86867192886958	2.50037977614438	4.16444567596157	3.59496992994974	3.51391921849588	21	16	14	0.03986472303207	0.884897959183674	0.0747114230223647	5.41990674054679	0.0338566974408811	1.17261904761905	0.0741621940956134	5.61066221609293	0.0444807996668055	0.502040816326531	0.0766374703583782	5.10338777928086	0.0345300731109365	1.15785089546022	0.0747701525541487	5.57878077354644	0.640621463218585	4.62767710049423	99.6985172981878	463.99176276771	0.4856	2.27357130272103E-05	43616.0131795717	1.44814613126687E-05	28099.4614184158	0.000107376530534877	197693.540362438	0.633134306693656	53.7799736495389	115.71673254282	567.437417654809	0.6072
186.7716	203.5736	220.5116	2.41566418195907	2.36198709564638	2.5213221610893	-0.511649913245941	-0.509553807937026	-0.0351834321577947	3.14251762627239	3.04661126630449	2.62663554557828	3.26547405127392	3.23252452320809	3.35997144750026	16	14	14	0.0634255726780508	0.392244897959184	0.184995146057966	4.51584803856721	0.0503663837984173	0.73469387755102	0.188020321426967	4.85368185894614	0.0583150354019159	0.538367346938776	0.191025352338997	4.63654641843734	0.0513254490484581	0.664723032069971	0.189038549500869	4.77442717163842	0.44886143894026	7.71491228070175	108.565789473684	204.217105263158	0.3648	2.46996551992291E-05	40108.5921052632	1.11054331469937E-05	17974.501296858	0.000189452893959829	311194.752192982	0.572376424798085	60.1078717201166	144.64139941691	428.660349854227	0.5488
163.7372	185.7144	203.6656	6.04093835095178	5.72943563014718	5.80366923936918	-0.34836502416829	-0.377657248163314	-0.358294134869888	2.29259403601821	2.07713423855491	1.8942529928763	4.49673497592966	4.37668427997551	4.30653385211117	30	25	25	0.0278300708038318	0.374285714285714	0.0297592880057051	5.66286192535758	0.023052099241057	0.696853741496599	0.0311680815897731	5.88742543821526	0.0259641815910037	0.602857142857143	0.0310519888011253	5.69820562839164	0.0228179602383499	0.766763848396501	0.0310753432083306	5.87926072828272	0.425112812016371	8.95955056179775	46.0606741573034	196.110112359551	0.356	3.03096200927833E-05	32758.2078651685	1.29228626844464E-05	13882.3893900195	0.000270232530385074	295118.507865169	0.564074711076311	57.0643356643357	65.9972027972028	445.770629370629	0.572
187.7972	206.532	223.9072	4.18330875743113	3.6602972556884	3.89391681472525	-0.277534674397182	-0.832592785683613	-0.730971864318219	2.78295323109619	3.42553467903073	3.12374201491893	4.04265788898101	3.75868357429769	3.8718085573275	21	19	21	0.0318060807996668	1.25183673469388	0.0701213382847595	5.69707342490828	0.0262799209819982	1.77210884353742	0.0689963703770818	5.93777999578993	0.0373521032902957	0.524081632653061	0.073039715325187	5.28354069588343	0.0268465468278957	1.28029987505206	0.0709750998935194	5.82647276914541	0.67008611310181	3.76575875486381	90.684046692607	534.372762645914	0.514	2.42874605234616E-05	40832.8677042802	1.63873693142643E-05	27173.3692565038	8.96249321108298E-05	156796.988326848	0.665814815988128	50.0735021618283	113.130945027795	666.289684990735	0.6476
177.9532	198.2764	214.88	3.41195101957809	3.36772965660844	3.42531750353161	-0.582383942986969	-0.451979805046603	-0.382279484760554	2.91875728618313	2.65620447307418	2.62422342604653	3.67946131929233	3.71276519332574	3.76749605117713	19	17	19	0.0414060807996668	0.502857142857143	0.0914823626384429	5.09608723080942	0.0353556388541811	0.681972789115646	0.0954165805858417	5.28016459731598	0.044779341940858	0.440408163265306	0.0946631561190235	4.95850284784761	0.0345665010813036	0.757184506455643	0.0945506742805915	5.28370374575318	0.509709827096129	8.31475748194014	92.609907120743	256.477812177503	0.3876	2.62350032456807E-05	37770.4778121775	1.33583855554057E-05	19270.8557321782	0.000219513032271011	312028.067079463	0.544350684726853	61.5761194029851	109.20447761194	391.511940298507	0.536
193.6836	210.9168	227.7372	3.90593024003246	2.31678176788406	2.22390111290947	0.67961302462117	1.03752420271061	0.495049862699013	2.84758971989679	3.75734327481715	3.36569588270545	3.87528655545028	3.05044912519964	3.1363037270471	19	13	13	0.0625346105789255	0.620816326530613	0.140567126600807	4.74771709335973	0.0539203138738488	0.839285714285714	0.145570911454468	4.93008805316582	0.0653624323198668	0.469795918367347	0.138048569241559	4.65243201888811	0.053041032986221	0.837984173261141	0.137934056179077	4.97253348670918	0.574704373215389	5.21441124780316	131.390158172232	363.031634446397	0.4552	2.28626732859524E-05	43353.5035149385	1.30795948733249E-05	25029.8107715353	0.000120972315626974	222679.919156415	0.593679632618765	56.2956581667815	158.703652653343	484.625086147484	0.5804
190.6788	209.4952	225.9544	2.99246229048922	1.9633585918013	1.87561207076517	0.765877459796667	0.473013017754442	0.235902750052269	3.32989839991669	3.89339203713934	3.26897105227017	3.50347793916406	2.93373527692967	2.93225875650815	16	13	12	0.0793429404414827	0.50530612244898	0.220920967022359	4.39610640702101	0.0674256096996621	0.717687074829932	0.216087055599497	4.61437572368873	0.0842428987921699	0.418775510204082	0.217619408516887	4.30458272125583	0.0688552822551897	0.663473552686381	0.22038059960467	4.5595505306247	0.527461597804611	6.26245210727969	147.189655172414	293.680076628352	0.4176	2.33319259342696E-05	42467.7691570881	1.22694625603536E-05	22469.5739062897	0.000147183677269818	263944.207854406	0.542464835798064	59.3350253807107	176.751994198695	403.883248730964	0.5516
194.5404	211.7844	228.6312	4.64081542834877	3.15219235453676	2.70199677275899	0.154566544315598	0.481145051626184	0.231632843171193	2.16124761308234	2.77801595452217	2.6329506476181	4.17795514727922	3.58680179841092	3.4411065956824	21	16	14	0.0303433569346106	1.03591836734694	0.0816517162622594	5.62208968077656	0.0259563434217225	1.45493197278912	0.0808177903417353	5.83308917168229	0.0389171178675552	0.580408163265306	0.0847963690437977	5.23039704532673	0.0269870547135972	1.3344439816743	0.0815412709467097	5.78498604217369	0.688540630068501	2.66118656182988	124.215153681201	614.571122230164	0.5596	2.26705635053191E-05	43733.1579699786	1.55527984859615E-05	30218.6250494507	6.14564583480424E-05	114239.781272337	0.696025006845457	47.8703374777975	132.214920071048	757.189461219657	0.6756
185.4644	201.5092	217.534	6.73361215396313	6.71204256243954	6.3736993967397	-0.0442169522991133	-0.394406012874732	-0.524476811966069	2.41683208542177	2.19935093825822	2.4304997311915	4.59764567502584	4.56737535992319	4.53045064475007	33	29	30	0.0181091211995002	0.804081632653062	0.0225696723331457	6.34358235642889	0.014897583182933	1.45833333333333	0.0231002076023305	6.59138289987024	0.0213337775926697	0.735918367346939	0.0233729763797841	6.05226954837375	0.0163192103248664	1.13577675968346	0.0232885110790866	6.44838906359974	0.640976267390936	3.44046692607004	63.6785992217899	494.355642023346	0.514	2.4985717012196E-05	39791.2272373541	1.5922100368831E-05	25645.2465440519	8.8224488857109E-05	133383.528404669	0.7033096691463	45.6253553155202	78.23820352473	806.218874360432	0.7036
180.598	201.0356	218.2604	2.67813293172688	2.88609297147545	2.85443371616859	-0.992966478530807	-0.633833711155693	-0.532576667371766	3.84787260373338	2.48390998961866	2.72830216770998	3.22856265019463	3.35712024849346	3.45122657609523	15	15	17	0.0667062057476052	0.343673469387755	0.13627603622222	4.49671251865994	0.0572674435420426	0.522108843537415	0.142642103378893	4.6488102680709	0.0677051228654727	0.388571428571429	0.143866315410732	4.46424787600018	0.0577718120712233	0.518117451062057	0.142161807248069	4.68972654698596	0.447038607462891	11.8389423076923	98.9951923076923	182.995192307692	0.3328	2.55498155022692E-05	38775.4915865385	1.14217017270507E-05	17335.4820855366	0.000303408506940171	457616.552884615	0.496300917810552	67.4155844155844	126.251623376623	309.266233766234	0.4928
153.6884	171.774	188.8804	8.12606334211099	7.18669075444324	6.81824727037675	-0.0445455440362165	0.0592551476927931	0.0811527217929743	2.54625392973227	2.65013502325593	2.70036347474819	4.89014608624444	4.72752231480232	4.70920219224921	42	38	37	0.0215010412328196	0.478367346938776	0.0183647738614645	6.16281886295363	0.0158466235133509	1.5922619047619	0.0191836681593838	6.62032473021949	0.0186269054560599	1.28408163265306	0.0192809192210057	6.40582477112988	0.0162113141459696	1.47147022074136	0.0192460623455885	6.53731762009606	0.499945581043694	6.17938553022795	43.5827552031715	263.743310208127	0.4036	3.48947778302846E-05	28550.3805748266	1.73208266984761E-05	14382.6124876847	0.000218749599123238	173634.726461843	0.668570562452531	48.1650717703349	64.7511961722488	695.69976076555	0.6688
186.5388	204.4184	221.6164	9.4431189000245	8.66861819669087	8.1422632627544	-1.47423710937289	-1.62222201691055	-1.62886116016912	4.25643177955526	4.49612062735979	4.66735586318764	4.64661662806162	4.24973640681445	4.25577391816895	42	39	38	0.0334930445647647	4.85510204081633	0.012417127151979	6.25936210796367	0.0251884342172243	7.77763605442177	0.0120524752419838	6.56639897741374	0.0351740108288213	0.737959183673469	0.0129890815338069	5.84648239767826	0.0283647258595743	3.02748854643898	0.0126128830751107	6.29080046531879	0.725745971224641	4.0501872659176	61.8209737827715	652.820224719101	0.534	2.55409538964694E-05	39168.7086142322	1.89756392498378E-05	27766.4918971227	9.49201082978826E-05	171312.286891386	0.722966704322205	47.1818181818182	89.4137529137529	830.846153846154	0.6864
181.344	198.3648	215.4156	8.21900626596671	8.22214819618328	8.44092865980989	-1.5612404863262	-1.43202445304609	-1.55403083897097	5.86672518358463	5.31344808543183	5.7800412736146	4.69595421972919	4.67713095275604	4.63935678324851	46	44	48	0.021808579758434	1.86693877551021	0.0149659589747414	6.33487213634567	0.0175686345966958	4.15391156462585	0.0162381410236841	6.58318392793112	0.0211758433985839	1.55020408163265	0.0151138440858996	6.26360614785737	0.0181517107008551	1.74718867138692	0.0154316879141734	6.49591913380996	0.584118623577421	4.82547993019197	45.6160558464223	374.914485165794	0.4584	2.68012464113109E-05	37333.1116928447	1.61260635768773E-05	21225.3693468418	0.000122728240971304	188426.188481675	0.67013260310847	48.5345760673482	66.461214672279	694.950691521347	0.6652
219.8068	120.7964	110.852	6.68214589484546	16.1961151835865	18.9410162346163	0.0165199469068011	2.37410427496668	2.13776487703537	6.82640530376483	10.1105013290641	8.60356671432918	4.50182845895353	5.32996425917556	5.60400879134693	61	126	140	0.0139528529779259	21.4906122448979	0.00595610169954956	7.58348242104648	0.00907933326391752	84.5140306122448	0.00471392882913168	8.13167651799103	0.0105689296126615	50.2832653061224	0.00541554286387865	7.96244820373519	0.00915955294900878	50.555185339442	0.00542454174579317	8.1061460612474	0.807754334820481	1.14844192634561	72.2	1073.23909348442	0.706	4.41444064949159E-05	23028.459490085	3.50923065972207E-05	18974.3138626425	5.42938853939827E-05	24028.659490085	0.834123020647686	36.6767021769338	97.3408985641501	1415.89671144048	0.8636
189.2048	121.8116	113.8156	25.1253747625782	30.6203087090904	38.7849248631475	-0.495339618172713	0.371894080622769	0.322227908118408	1.73911040263134	1.47960380170111	1.46008555254472	5.86928140804626	5.75876967678095	6.15526013011057	84	102	120	0.00990120783007086	4.57673469387755	0.00339542307038501	7.72770667795242	0.00680669801934397	49.2912414965984	0.00313151355490718	8.55869925639098	0.0079900041649313	43.9559183673469	0.00314897199756715	8.45310912461221	0.00673761331917626	45.7426072469805	0.0031378255992587	8.53155014413915	0.724393455347373	1.68302130406714	45.8147191736604	752.584247901872	0.6196	5.11283329469146E-05	20396.0316333118	3.66217979359983E-05	14947.6292571481	8.7189019816072E-05	33511.475145255	0.838203087226959	37.361071932299	55.5773389750823	1414.67465914433	0.8508
218.9224	117.182	108.224	5.64931661707856	17.0967621496001	21.1057580768851	-0.173386282632809	1.52246344425371	1.20186782814382	4.79139634677611	5.34413166568649	4.09181409993593	4.43468962899477	5.57796002240421	6.0238046412354	49	102	117	0.00880699708454815	15.0763265306122	0.00609307182923108	8.09138129915297	0.00623112765514388	48.5093537414964	0.00573579163343983	8.58680001692264	0.00752819658475636	31.7028571428572	0.00561495301838576	8.39571693422844	0.00649684178170252	38.7917534360683	0.00560926367492523	8.50171178046555	0.856416470658529	0.659640102827764	67.3280205655527	1343.82776349614	0.778	4.58045746386679E-05	22156.0951156812	3.86613689618941E-05	19263.1993528912	3.37452487860443E-05	12804.1840616967	0.864045444056585	35.4254366323332	77.4702194357367	1590.61665920287	0.8932
202.0324	162.8272	160.9764	13.5991525559499	32.3500686268206	37.2493952036808	0.276999295403691	-0.226707410323633	-0.272850056385874	1.85635895220755	1.32055708803125	1.35862691984382	5.47430819231739	6.08486498095364	6.30005079506998	71	98	113	0.00421557684298214	18.5036734693877	0.00236585767204468	8.6574961136869	0.00305428293766489	47.6071428571427	0.00226470089878431	9.06564719958149	0.00390670553935864	24.4375510204082	0.00236570265001077	8.78093327913494	0.00329707825127005	34.8679716784673	0.00231709850786093	8.96899697763934	0.865215034150619	0.551863041289023	45.9466263846928	1403.47935548842	0.7944	3.33166109394073E-05	31219.1349446123	2.85156529024937E-05	27223.5943215662	2.03975599619788E-05	15761.746223565	0.871478982540633	34.6767676767677	53.3864734299517	1651.3970136144	0.9108
192.5176	202.1448	207.6496	4.97562963251888	7.87176174436193	8.65838436661251	-0.64975193770742	-1.72491265488242	-1.51388281573347	4.91521706495741	8.22981468472347	6.72986106148594	4.27381424043259	4.74413756259252	4.9065973818958	41	70	70	0.0106622240733028	4.77714285714286	0.0210410655840589	7.27316033613027	0.00651529744550884	17.7916666666666	0.0175136907666901	8.00937878465236	0.00878933777592671	10.3763265306122	0.0194538433100381	7.6421086501523	0.00853993051971783	11.1790920449813	0.0193108399436889	7.67747505959115	0.828229111986002	0.598950131233596	95.9942257217848	1220.02782152231	0.762	2.50137702538606E-05	39787.9375328084	2.07982967089262E-05	32835.6669456474	1.45698591719325E-05	24431.9448818898	0.85712431278027	35.3182834152883	109.431828341529	1560.17389360751	0.8948
213.7936	111.9064	101.2824	9.70413309059599	25.2285877337595	33.1212235619399	-1.15737902969777	1.85266403640163	1.64925718313323	3.56015622238473	5.29776743167232	4.56126894816348	4.86545463904356	5.42849023673973	5.88223410885476	56	114	134	0.0161132861307783	16.9681632653061	0.00336391587164458	7.47696017975639	0.0125110630987085	60.252551020408	0.00317159104363936	7.88532779888553	0.0154209079550188	43.4122448979591	0.00325041000909298	7.71000493550878	0.0121213204063763	56.8517284464807	0.00323111512401733	7.89289679852969	0.784925134705878	1.66464891041162	59.5351089588378	946.59200968523	0.6608	4.93675726625269E-05	21180.3783292978	3.76597431849431E-05	17172.1365355762	9.19924822453228E-05	29970.74031477	0.798734088740664	40.0647915620291	75.2491210447012	1190.72275238574	0.7964
214.362	130.1072	121.634	14.8977500314645	20.9590006479317	26.8066716322635	-1.14907683681268	1.01843245775474	0.750566745188223	4.76315163282644	3.55309259359921	2.67264876157275	5.43790669354547	5.78370789368091	6.19514713366176	97	118	137	0.012253227821741	16.3657142857143	0.00501614078463491	7.83484245045964	0.00936747998519101	75.6096938775509	0.00416412183375918	8.42853560261992	0.0107995002082466	49.368163265306	0.00449550726318987	8.36593972578183	0.00947664975772773	50.3952519783424	0.00452556984574164	8.48268363271961	0.82047930272915	1.06455203116305	56.6282693377852	1130.90428491931	0.7188	4.12455305432902E-05	24710.5403450195	3.32851224143884E-05	20651.3508692823	4.89385162456709E-05	23031.0628825821	0.85063530390101	37.2385406922357	67.8269410664172	1474.02525724977	0.8552
215.4452	116.2148	106.9164	12.3869526906338	22.2285370854674	26.3007188312411	-1.180327344677	2.08371753358114	1.96984901545522	4.85449739205951	7.5419947125603	6.63975033855928	5.0049940451819	5.72657013495365	5.91105221752389	80	157	164	0.00903390254060813	25.4265306122449	0.0041022987741421	7.86186495272667	0.0069198597806471	92.8184523809522	0.00345785538912974	8.2408306560568	0.00954668887963355	49.7310204081632	0.00386885191081047	7.90602255322879	0.0076934138749977	51.8571428571429	0.00390181140713474	8.10485797467938	0.826711279369904	0.679787234042553	61.7957446808511	1200.02340425532	0.752	4.74444002377372E-05	21729.9936170213	3.86813876070168E-05	18318.2182996635	3.45354865116449E-05	13275.2558510638	0.825853618880186	37.5975378787879	70.9649621212121	1355.84375	0.8448
176.214	175.75	173.0444	17.3706017166936	28.608297747332	38.1717071748173	-1.32600659024463	-1.22578219188202	-1.18742724609657	3.42216985519303	2.945025150864	2.84036947576355	5.21831195895754	5.81765644627538	6.23203000290673	82	109	135	0.00617209496043316	14.1763265306122	0.00148417799190933	8.26888123942303	0.00403875410708502	25.6458333333333	0.00145778485753836	8.76118773102806	0.00509254477301125	9.29510204081632	0.00144858460628286	8.51857253982541	0.00437083604447058	19.4739691795085	0.00147722743483118	8.66916165416203	0.846484728668844	0.579164517792677	49.3414130995358	1304.1253223311	0.7756	3.64920064109164E-05	30552.8411552347	3.17284055392595E-05	25283.1192597845	1.69577520380183E-05	20470.3218153687	0.853994530753074	35.2644037516749	61.1866904868245	1547.21438142028	0.8956
162.5988	131.9844	134.0608	24.0058875811747	47.1876864938301	54.133644837199	-1.23635542488439	-0.145902767218288	-0.152560998708529	5.04847775820611	1.28021264459935	1.24033934438673	6.09180433042778	6.5380016969245	6.59129973938675	133	141	150	0.00227471886713869	36.1816326530612	0.000723811195400431	9.4541451103041	0.00194327305752233	45.6084183673466	0.00073418445902371	9.56718057634198	0.00287713452728028	6.58530612244899	0.000732355811249185	9.05333505790173	0.00199642624264047	34.9629321116202	0.000724839907215389	9.56230683819634	0.913809400742591	0.288683602771363	25.7926096997691	1735.79538106236	0.866	6.48431201988598E-05	20808.080369515	6.01532689920376E-05	18735.5278085183	1.37247450388519E-05	7597.99953810624	0.896813185429526	33.2796789184622	31.1478664976764	1837.01267427123	0.9468
194.0252	198.18	203.172	5.86969888154409	18.045065807583	20.6542396616288	0.599922776102048	-2.21146865197749	-2.24077897672787	5.84871679019779	6.83946183134794	7.04057201512843	4.44276908635283	4.87455647669127	5.09476634398248	59	90	100	0.0149747605164515	9.28367346938774	0.00658793234161658	7.23692359443017	0.00987941945485675	19.0437925170068	0.00656699458546211	7.68013342810518	0.0123082049146189	8.21795918367348	0.00615801244242679	7.38665926050548	0.0116089002898799	13.5693461057893	0.00644407754782943	7.49522141998383	0.811018744783243	0.964245810055866	88.1877094972067	1097.86815642458	0.716	2.63271350489164E-05	38458.5357541899	2.17015045563289E-05	30759.070121437	2.33420444866294E-05	39543.143575419	0.844630443644909	36.0469248291572	112.701138952164	1480.26378132118	0.878
152.6184	143.8688	136.2632	27.8867850682003	38.853185024654	48.1646958441554	0.00522302050514378	0.0790182714100596	0.0838317789458861	2.23153639797061	1.45627831959086	1.29734101464722	6.64680967016394	6.74999101049869	6.75129173886208	149	148	157	0.00135443565181175	39.4734693877549	0.000783199647354198	9.95098600335706	0.00100724813735018	70.5918367346933	0.000772114939153204	10.2579493095122	0.00132211578508954	23.7265306122448	0.000781694151355699	9.92608378192665	0.00112562428434218	52.2882132444817	0.000779735971772643	10.1240852880535	0.91631340855952	0.248856358645929	22.8929551692589	1761.40530649588	0.8744	5.6802493003049E-05	22198.5096065874	5.23072580679101E-05	20206.8179455118	1.24109452885633E-05	6288.02653247941	0.908946090379194	32.5653973509934	27.9594370860927	1934.69867549669	0.9664
198.5972	155.346	156.8216	18.6619975393847	29.1560608450456	36.2058803710116	-0.0513264203443646	-0.218653826234223	-0.273770427142527	1.59927163169556	1.36353088811841	1.42873293980734	5.90650082218492	6.00686280592039	6.38669831580685	70	88	110	0.00516118284048317	17.1648979591836	0.00336811581563996	8.5300078636507	0.00337026817529735	57.0727040816324	0.00312730711686072	9.09503763068363	0.00395135360266554	28.209387755102	0.00330802853838121	8.85032342813284	0.00353507432433486	29.4727197001249	0.00330130280598326	8.96341704403019	0.849671640902434	0.714285714285714	46.1168831168831	1306.25194805195	0.77	3.58213363503518E-05	28676.9319480519	3.03797589128411E-05	24363.2447330795	2.64122004506257E-05	20094.9651948052	0.871158817813305	34.8386243386243	55.6490299823633	1644.70017636684	0.9072
165.7224	172.8084	180.3584	8.85878875693512	8.66259138133619	9.96443422578523	1.97701262501639	-3.08907936074687	-3.2315915204539	7.05241630792058	15.4440725769298	16.434733031419	4.61518091259905	4.44417188370928	4.64091087431996	51	76	77	0.0177409412744689	3.25591836734694	0.0299125182731446	6.65833869811186	0.0117558077652829	12.7436224489796	0.0253583130725202	7.20305090197272	0.0141334443981674	8.43265306122449	0.0268459977812083	6.97549307926539	0.0128391248891332	9.13869221157852	0.027161672139014	7.11392088873611	0.742228152322174	1.23133414932681	98.8959608323133	833.74541003672	0.6536	3.38022070654552E-05	29409.3971848225	2.51398490064897E-05	21802.3994140423	4.12230145373383E-05	36424.1389228886	0.812739765456205	38.0887290167866	124.335251798561	1290.9654676259	0.834
186.4808	175.2732	176.9936	11.6578570655159	25.4464803412967	29.3557755652955	1.10747383246598	-1.16945692553973	-1.2531550218734	3.93288241885328	3.1039584281367	3.35834932465759	5.32712978323213	6.0180388592791	6.20968520685497	66	118	126	0.003875052061641	11.2975510204081	0.0035199337785541	8.75014457427012	0.00231059685779072	45.2627551020407	0.00346159990375765	9.34851846459114	0.00286980424822992	28.2	0.0035230161068447	9.13146768381604	0.00265872143721874	30.4860474802165	0.00354053416864763	9.170461810528	0.873453690451168	0.426189308484551	48.5850907307504	1469.84747425208	0.8156	3.18876834536726E-05	32199.1549779304	2.78988339975531E-05	28057.8389018755	1.39060688843015E-05	13576.3354585581	0.901254817098542	32.874686716792	58.3266499582289	1876.9791144528	0.9576
191.5568	117.6784	108.798	25.5062418588078	27.382837205812	34.6399826212428	-0.711304319142678	0.556104469517032	0.479362977305825	1.9255911586818	1.74291710466676	1.66158345422815	5.74894258150907	5.80238630022521	6.21046491802399	84	97	116	0.00897092877967517	5.46857142857143	0.00455455502257843	7.83796308411881	0.00563205724466676	47.6653911564624	0.00413002694418177	8.70320167765593	0.00644264889629322	40.2791836734693	0.00416944712641009	8.61126655368721	0.00551779671145639	41.8800499791754	0.0041539357109154	8.67762313727152	0.768551365437048	1.26785714285714	49.7309523809524	919.860714285714	0.672	5.20997643436261E-05	19732.9755952381	3.96165379513735E-05	15324.0341827497	6.88983168168474E-05	23767.8613095238	0.854580343452128	36.1216400911162	61.1184510250569	1523.8291571754	0.878
213.5312	137.7904	132.7216	9.02069989302382	14.6596066741233	19.163384185472	-0.34608001462919	0.468750068891643	0.319656719043352	2.28174090370302	2.6102842660614	2.44768268706485	5.06648252517743	5.74818985551742	6.12215256684455	47	70	88	0.00746588921282798	5.32571428571429	0.0123069830158971	7.73588584154991	0.00490247119255872	15.6016156462585	0.0116819324933256	8.28905938863302	0.0056216576426489	10.014693877551	0.0121277659068786	8.11032183084541	0.0048145634168465	12.4660558100792	0.0119229663132428	8.2862417190505	0.82152780279562	0.867535287730728	62.213897937025	1160.26601520087	0.7368	3.83002114623822E-05	26083.9153094463	3.10661321167649E-05	21691.0885803761	3.59418970862621E-05	20836.6384364821	0.839184329330194	36.4213431462741	71.6973321067157	1445.14535418583	0.8696
177.6192	186.388	189.6352	8.06556826020337	9.18297642379637	9.00993457023967	-0.309389147366988	-0.474054402998929	-0.422186167834316	2.93316558923263	3.54784766288116	3.55679719893266	5.02546452903321	5.19428571858845	5.17032001827482	48	68	65	0.00385039566847148	9.61551020408161	0.0124098915911808	8.46855650371926	0.00234458154009902	33.0208333333332	0.0104055954234698	9.12297940681336	0.0028811328613078	21.9628571428572	0.0114027843194786	8.90885966199113	0.00251127489049492	26.9004581424406	0.0109332928456796	9.04013589505614	0.911740529010505	0.233165368758589	74.1012368300504	1736.45579477783	0.8732	2.94049004764936E-05	33949.4759505268	2.68179266500842E-05	30942.7059044664	6.77548333026258E-06	7990.29317453046	0.903205605939735	32.7568692756037	79.9067443796836	1893.01831806828	0.9608
214.5248	135.7308	131.2052	11.8501892373076	28.7337002726763	32.554518779426	-0.544055893024274	0.940331451915274	0.809004049099834	3.29689479940467	2.59946811627718	2.37267156963695	5.47245127853703	6.26364906319239	6.51940879500321	87	134	139	0.00572894627238651	37.993469387755	0.00239709739604382	8.93920047736749	0.00401670021750195	108.293367346938	0.0021735256397431	9.28199464449574	0.00534643898375679	53.9199999999999	0.00236458727613898	9.03120463747343	0.00454950656579489	63.8683881715953	0.00232501677785082	9.17162265002769	0.889617216847885	0.467702768334143	48.2297231665857	1552.23749392909	0.8236	3.98567730645427E-05	26275.3778533269	3.489715268625E-05	23760.0351482293	2.15121272484378E-05	10242.8586692569	0.884940426647717	34.0842332613391	59.238444924406	1742.54384449244	0.926
217.4684	128.1116	120.0124	8.01809213217209	19.0777342847624	24.3726454501763	-0.468565353602348	1.39970666786314	1.1532162009384	3.46076880668703	4.55534490812202	3.47875451513049	4.77965114651928	5.43629503259961	5.87901451130539	55	106	119	0.0188254893794248	10.7640816326531	0.00549646485195263	7.35887435806054	0.012535647762506	51.1960034013604	0.004778035345824	8.06791604904625	0.0139348604748022	36.3195918367347	0.00507792740028722	8.02679527748078	0.0126673930288311	39.2661391087047	0.00500389999083883	8.10138589916071	0.789475475126776	1.41502683363148	58.4358974358974	972.398926654741	0.6708	4.09979094630697E-05	24803.8360166965	3.15811461013474E-05	20092.6578393653	6.54245181018497E-05	30358.2850327967	0.82386580564028	38.1597122302158	80.9443645083933	1333.24748201439	0.834
216.2048	128.2676	123.526	7.81038135816683	22.5035639452954	28.0236279592775	-0.514182388517824	0.909354990825922	0.708682707390003	3.9572319872181	3.16139863271706	2.80349929032277	4.92236014224368	6.13632056471487	6.58535241234248	60	105	126	0.00414860474802168	20.8318367346939	0.00363564298365283	8.98696329311689	0.0031001984126983	76.6619897959181	0.00333063097927264	9.43410114258129	0.00377276134943783	56.3102040816325	0.00337827932676858	9.26706241899144	0.00314061144521726	66.7821740941274	0.00332851132474275	9.41515443368576	0.900014755468159	0.384469696969697	47.4005681818182	1632.43087121212	0.8448	4.20609602292231E-05	24432.4214015152	3.74165361926597E-05	22224.8352499223	1.88992254029393E-05	7899.58475378788	0.892006092333485	33.6814688300598	53.0819812126388	1794.65584970111	0.9368
185.9496	171.1372	172.4624	14.7856639972644	28.4282531324033	32.7363496169014	0.977508279515649	-1.03005459451945	-1.06117586108068	3.59213850305447	2.6822104144157	2.76092112900135	5.5805051140369	6.10989360244147	6.27056112727673	87	106	119	0.00353919200333196	13.2159183673469	0.00303168557539822	8.81720316786319	0.00251812034337544	33.3473639455781	0.00297866501352761	9.21829251059032	0.00315401915868389	18.4636734693877	0.00299001992039114	8.94895041728651	0.00278500506782455	22.7113702623907	0.00299408719245756	9.11142208953722	0.887247731066847	0.366906474820144	46.1817745803357	1557.8412470024	0.834	3.32070976162296E-05	31108.9414868106	2.9479110613476E-05	27547.9896777109	1.21357265567987E-05	11623.9122302158	0.893257829058625	33.378813559322	53.3169491525424	1812.88813559322	0.944
214.7744	126.1808	118.4416	14.1508835285999	30.6253769178438	39.315637975747	-0.98246784262797	1.14659390384102	1.05824407323875	2.75237867624298	2.84319651769834	2.64415029117482	5.24147220545495	6.0093466431017	6.25879809457825	62	112	136	0.0103453561016244	22.1665306122449	0.00257972424675391	8.16414222826407	0.00882878661668712	57.2164115646256	0.00254556955822445	8.42233775401088	0.0106885464389838	31.4244897959184	0.00261970982565789	8.18259139530113	0.00884974173436313	46.939192003332	0.00255797884457624	8.38356708016509	0.814263370986254	1.02356902356902	43.7194163860831	1103.3950617284	0.7128	4.29466242688413E-05	24418.2210998878	3.39923211969304E-05	20452.9901024766	5.06907192058093E-05	20890.9893378227	0.821331917535439	38.4867085548574	53.9521507974867	1315.0657322378	0.8276
174.888	125.15	122.1272	27.6841950578304	39.5605801271923	42.4985060932734	-0.17978181109028	0.0277425597037336	0.0750181589235326	2.04681851163478	1.69563881924291	1.67151011862544	6.60611475482647	6.97307110471047	7.05679358996166	120	140	147	0.00128213244481466	24.1306122448979	0.000843789957854911	9.94063269227517	0.00106870979684389	48.5429421768704	0.000835246003959988	10.186323066564	0.00145306122448977	17.4004081632653	0.000844825612844369	9.78678426943324	0.0011682970496293	31.615576842982	0.000836638718444179	10.0781526048629	0.945621093182149	0.145224596598343	22.2464020933275	1993.01918883559	0.9172	6.23816693229558E-05	20462.3807239424	5.89918832744225E-05	19247.7120658284	7.96572688897775E-06	3506.20104666376	0.930798041358008	31.5427539140907	26.2557205941389	2114.61140104376	0.9964
217.65	147.1464	143.1364	13.5870931401827	29.3264823502581	36.0823529587526	-0.416213666112075	0.381510670443547	0.209125053226004	1.77883251834239	1.60123708359378	1.5053167075563	5.38966893082422	6.23637338399975	6.63763273693405	53	97	119	0.00560633069554352	18.4665306122449	0.00293776816794285	8.72061979148503	0.00400476942477666	46.5514455782311	0.00278609654353252	9.16307583883615	0.00478400666389004	24.3342857142857	0.00290081450870442	8.90708617996018	0.00394896545431491	36.4127446897126	0.00286059441041089	9.09766153914664	0.872708029006744	0.626760563380282	43.0643863179074	1434.32997987928	0.7952	3.55069507002412E-05	29024.9330985915	3.0614000207527E-05	25571.2375501229	2.5769299046458E-05	15640.8923541247	0.863511610474645	35.3179991067441	50.1701652523448	1591.24475212148	0.8956
150.7868	123.556	121.1992	32.1830723480528	53.9682912829376	58.1306005418833	-0.564488605114878	0.127637385392809	0.0553849229899335	2.43503655963553	1.50532744876682	1.47344035155048	6.77354030773516	7.03366785933462	7.00653792707778	138	173	178	0.00169362765514366	39.3399999999998	0.000506524454408045	9.79960964325009	0.00136697961497528	53.4655612244893	0.000514313984922501	10.0300379771279	0.00200816326530608	11.2804081632652	0.000505952702074978	9.62209839913779	0.00142502750745427	46.4414827155354	0.000503623288861174	9.98652071910543	0.936192222222222	0.193777777777778	18.3066666666667	1910.75377777778	0.9	8.47846011801427E-05	18630.1791111111	8.08852822197855E-05	17059.0797811111	1.12048632705638E-05	4789.05111111111	0.914902716874353	32.2712351251539	22.8489946655724	1982.67172753385	0.9748
198.3204	111.1448	101.162	21.8767489321425	23.7934241537447	30.3729313040411	-1.47132509590129	1.05759300413671	0.951957804247834	3.78135195249942	2.75485620186649	2.51689776842309	5.37119752285656	5.67721708611966	6.13468295337401	84	98	116	0.00947638483965019	4.72775510204082	0.00546483001304993	7.74552550543214	0.00562157260863546	43.5357142857142	0.00488318171028479	8.54556563557817	0.00634535610162433	42.1926530612244	0.00483684302811901	8.45793123804218	0.0054733892809137	46.960433152853	0.00477999131968896	8.58877404726695	0.768911369122747	1.20226055919096	56.7441998810232	921.052349791791	0.6724	5.38142364003052E-05	18987.8126115408	4.0850436676094E-05	14801.0278292032	6.7634709832697E-05	21637.9137418203	0.844826438329799	36.0277904328018	69.8628701594533	1481.67699316629	0.878
216.818	130.6632	125.5568	9.68310260195563	22.9319900087193	29.3628808831831	-0.566847275483957	0.892595510970169	0.685988712570044	2.52426386672924	2.64406572601232	2.31375695395153	5.09863172473437	5.95806440911049	6.47346972533426	52	94	117	0.00814727197001258	27.5526530612245	0.00396430418331613	8.60730325752057	0.00612953514739255	72.6862244897956	0.00362245893365906	8.99525056145028	0.00874369012911296	28.5938775510204	0.00393430942136176	8.57463282825442	0.00716781030255867	34.7517700957934	0.00393436672536033	8.72547224630902	0.891599287014986	0.633677991137371	56.4219596258001	1540.51157065485	0.8124	4.06310911236082E-05	25209.6912850812	3.56464213009375E-05	22832.7618747397	2.99694231939917E-05	13345.6228458887	0.870018467583233	35.1975088967972	65.6103202846975	1627.23754448399	0.8992
184.8688	176.9968	182.5332	9.13422063232545	16.6177492386905	19.0106311773176	0.905228519833138	-1.62168827220474	-1.6858300638706	3.26947808744489	4.73373376868095	5.06042807057781	5.0244833575675	5.29220733239431	5.4851438069744	50	86	98	0.0120336526447314	7.04979591836736	0.00875456951825139	7.62646359746444	0.00770801517886068	32.3839285714285	0.00776198092637171	8.24523904801436	0.0090552269887547	23.9171428571428	0.0081972814496408	8.05957783064079	0.00819265053555186	26.841316118284	0.0080654075367121	8.1618650533082	0.816493541627967	0.841269841269841	78.7405582922824	1136.11111111111	0.7308	3.12134026194426E-05	32170.2561576355	2.5668720811434E-05	26078.3738976983	2.50127361644278E-05	28310.8626163109	0.854604553202812	35.3606263982103	95.5610738255034	1547.06532438479	0.894
177.5128	176.7764	180.5916	5.66288231910217	7.43897862881727	7.73558074355119	-1.03520937460998	-0.555774071669756	-0.349730002636688	5.22753108607567	3.22894060368993	3.74002004831863	4.37757741682893	4.87670338249035	4.94907412009615	39	48	57	0.0106019158683882	2.54489795918367	0.0292419072306638	7.08784647368794	0.00679585184413903	8.5	0.0265187243300521	7.77815921584422	0.00792336526447314	5.55836734693878	0.0275490880285116	7.54838361659896	0.00711507647878913	6.55351936693044	0.0273546453911501	7.66875620598382	0.806537837140694	0.731521739130435	90.8684782608696	1113.42934782609	0.736	3.162482623835E-05	31405.9673913043	2.55645044637309E-05	25274.6971441843	2.27101805994811E-05	23368.7119565217	0.835922401210895	36.544783010157	101.743305632502	1427.30840258541	0.8664
217.6916	129.7876	122.0912	10.5230266292545	18.5663805368736	23.6332579759965	-1.3220153732888	1.67715896764073	1.5630149819204	5.15280335240807	5.31914692288264	4.82030851285866	4.97111323653805	5.59578708690803	5.97408051063791	72	107	122	0.0101840899625157	16.4208163265306	0.00646245021505416	7.82019890909961	0.00685948273867385	56.126700680272	0.00562206271688736	8.29121844585963	0.0085647646813828	26.2081632653061	0.00625175799538246	8.0240683532219	0.00778777966490093	25.5064556434818	0.00631544908615196	8.15443810213771	0.821434833674604	1.13989927252378	62.0442081701175	1128.2937884723	0.7148	4.06602368484551E-05	24908.8970341354	3.28348897092145E-05	20859.1233001364	5.07166699477828E-05	25379.466144376	0.84137808913459	36.4376438104004	79.5135757017948	1454.13575701795	0.8692
221.5868	129.1456	118.79	8.64750054986989	22.0650402365371	25.9512061376731	-0.640516938225405	1.88796351580319	1.73756638953937	5.66028700323477	6.10138963159098	5.41911514558863	4.87513220826889	5.59955181478791	5.84519821037214	67	128	139	0.0112459808413162	18.2248979591836	0.00380886588595555	7.85756849215981	0.00662520535425072	86.7380952380949	0.00324797788381072	8.52425410624831	0.00809262807163689	52.9922448979591	0.00353723939112866	8.33864262669913	0.00780547325050783	50.5010412328198	0.00354908450667875	8.33353324949354	0.819314589113152	1.21147356580427	56.9482564679415	1116.07311586052	0.7112	4.07385266021415E-05	25232.0196850394	3.27655833657865E-05	21114.2515042997	5.45601214390765E-05	26844.2733408324	0.860487735869598	35.6567567567568	76.5558558558559	1565.98918918919	0.888
202.2988	124.4604	117.3172	16.4384402715099	16.3665644482891	17.4770187434814	-0.246973188644712	2.33798881340309	2.44543378307828	2.31193642227474	11.1124094294626	11.5097202903846	5.80899132043075	5.59088684145855	5.65973237553421	91	135	141	0.00438317367763435	23.8383673469388	0.00421432622747297	8.47964783156456	0.00293786732380023	84.8618197278909	0.00356981758864629	8.98526287662363	0.00399933361099546	39.6608163265306	0.00399211231147065	8.65503152166851	0.00319646766644675	37.3881715951687	0.00404648302649959	8.85854542406146	0.855156112273969	0.621538461538461	47.0010256410256	1342.70358974359	0.78	4.63260179328971E-05	22183.7794871795	3.9229511093417E-05	19197.3346558535	3.07822720959772E-05	12629.5476923077	0.868057812354599	34.6279069767442	55.1123299692848	1635.65291794647	0.9116
230.3812	128.9096	119.9564	6.30535380133423	13.2037808161148	17.6955615632847	-1.51019178012522	1.81845540558945	1.53918896920833	6.34611794211971	6.17533147689824	5.17365854778302	4.41764347514253	5.16052266269648	5.73564551374982	46	76	96	0.0165617659308618	7.96448979591837	0.0120568457599854	7.16719154361613	0.0109499369475679	26.3239795918367	0.0110394776361364	7.67960687296551	0.0127986672219909	16.574693877551	0.0115659070622086	7.49990719949949	0.0116071656246242	19.7092877967513	0.0113889625635826	7.64021079361263	0.809348222015096	1.2116704805492	85.9370709382151	1068.47940503433	0.6992	3.8982108069545E-05	25676.5715102975	3.10912932059664E-05	21109.0189535564	5.08134874663593E-05	28578.9347826087	0.840832521842947	36.8023201856148	109.687703016241	1441.66728538283	0.862
207.8572	138.1024	131.6352	11.158172258932	39.3413257814223	46.6840156901696	-0.0619988268785409	0.345355322859033	0.276664362110925	2.80255908953718	1.50940990872713	1.48898544601966	5.39994940007551	6.58501965099842	6.88338081884642	74	126	151	0.00353219491878391	25.3244897959184	0.0013545761684563	9.15146144090529	0.00257777430700161	91.6075680272104	0.0012870225104057	9.51266474217158	0.00288579758433993	55.9661224489794	0.00132441009660474	9.39037409587372	0.00257753910325782	64.5751770095794	0.00131130708331225	9.47615376227485	0.872038648539841	0.701568032372281	29.5058168942843	1423.93171471927	0.7908	4.09898012465451E-05	26766.774911482	3.48730318960691E-05	23827.591227773	3.71849118495116E-05	14077.7936267071	0.873445735650642	34.765068191817	36.8812142542895	1658.78002639683	0.9092
225.8716	117.1968	104.5324	5.5283192237786	14.6727935227073	17.3212052190372	-0.378190999706106	3.90228362305353	3.48601390619843	9.97577855308891	21.4401141687256	17.7649074385568	3.9127490994638	4.74326471437068	5.12642892803213	59	127	138	0.0248889629321112	15.9102040816326	0.0074188109793832	6.52947155862448	0.0184106593317603	58.125425170068	0.00627891397833192	6.97465968991318	0.021916867971678	33.3791836734694	0.00706749599095489	6.77793730003644	0.0192504476737357	34.1420241566014	0.00705985334046374	6.87256207575768	0.743280649350255	1.81585677749361	97.116368286445	799.599744245524	0.6256	4.46382279035671E-05	22678.3081841432	3.26166246341024E-05	17242.0087974957	8.49771982264628E-05	38339.9175191816	0.784205553901851	40.5821047280122	124.277071682766	1128.24148449415	0.7868
166.144	157.6992	151.484	23.3431288391252	33.737870699853	42.1891946355936	-0.542080962675914	-0.424003749079078	-0.355039347541675	1.90157766942051	1.56473983354757	1.431434830559	5.93166145317309	6.329205086032	6.54429965221817	95	123	147	0.00295776759683466	15.8216326530611	0.00101131336804368	9.1851690300421	0.00215513501318895	28.7295918367346	0.00100982262378725	9.52344591768943	0.00297942523948356	9.88653061224487	0.00100883374259092	9.17023880924086	0.00244258214637418	20.7213660974594	0.00101332246595932	9.38141326659572	0.899991176587778	0.373106060606061	35.3626893939394	1633.17708333333	0.8448	4.5556187118246E-05	25822.4881628788	4.15885728940561E-05	22905.347550168	1.3681128664985E-05	11411.5771780303	0.887256753159568	33.7265725288832	41.4920838682071	1767.25588361147	0.9348
158.17	150.1488	142.7476	20.3320313790826	32.8471407973358	40.9296065732374	-0.0943722288643378	0.0310250676621281	0.0296717735391627	1.93087542115678	1.56223934464727	1.44719606213546	6.2048517698271	6.66964466747509	6.81966158442617	92	126	145	0.00157900874635568	22.5661224489796	0.0011104678463061	9.70292080315357	0.00121043315285297	36.9472789115642	0.00108460824142131	10.0281747442796	0.00149371095376926	11.618775510204	0.00111646600319307	9.71709761383655	0.00123629592764781	28.0349854227404	0.00110957938316092	9.97298296506284	0.923735069758105	0.214092140921409	25.6513098464318	1818.94760614273	0.8856	4.88130950545126E-05	23601.4101174345	4.53938545344454E-05	21603.2881655877	9.59105619497783E-06	5601.05600722674	0.900289682701839	32.9021739130435	29.6872909698997	1870.28010033445	0.9568
230.756	127.326	117.5256	4.75887213528584	10.8235541297672	14.5668028283491	-0.594587267796649	1.68880640220889	1.25725132606197	3.23762585628378	6.62399047653045	4.98093319383894	4.20772131736366	5.11522134050911	5.66429790641264	33	73	95	0.0131785089546023	6.83510204081633	0.0161824965232656	7.23188635331209	0.00905257936507918	21.9451530612245	0.0139856560229447	7.73280971892918	0.0113456059975011	14.0771428571428	0.0150665970431474	7.4718804375212	0.00965358561379643	17.0362349021241	0.0146287545685606	7.67762543215467	0.811139329106128	0.915555555555556	90.2488888888889	1103.99555555556	0.72	3.97098038359422E-05	25110.465	3.18984513222699E-05	20579.6463298914	3.83709300308065E-05	21620.1161111111	0.826802232092081	37.2018779342723	107.908920187793	1370.43568075117	0.852
214.1336	116.3972	108.6204	13.6795815374594	20.8371646862043	24.5542074569716	-1.98590456064843	1.88459257845698	1.9647538490294	8.07184114475139	6.4389838206571	6.37294481024201	5.32316220664702	5.77351073744733	5.8334640885791	102	129	133	0.00715835068721367	15.244081632653	0.00354670472159925	8.23891523024195	0.00543791070850123	52.5454931972788	0.00348679695796825	8.56771843409762	0.00663556851311955	30.585306122449	0.00343496745260292	8.36220653710469	0.00589179054055824	34.1982507288629	0.00348865559886689	8.49015970635132	0.846098137998938	0.862619808306709	42.3226837060703	1266.33439829606	0.7512	4.86145699064467E-05	21503.1272630458	4.10496865839404E-05	18341.7151998748	4.24156124438164E-05	17489.1916932907	0.854610782718572	36.2781335773102	52.6349496797804	1519.56175663312	0.8744
182.6556	151.328	154.872	21.0160745297498	35.0676548403226	42.2234297043715	0.425539655488946	-0.540314291293776	-0.651366235946728	2.08794525632326	1.68187576226792	1.82709648019953	6.14688206016559	6.32867668742438	6.57149963812676	83	132	144	0.00309704289879215	34.3473469387754	0.00206313131595	9.13265407890701	0.00227697371465592	72.1998299319723	0.00202393500552104	9.42963190844863	0.00296343190337358	22.9240816326531	0.00206007147244799	9.06535353627012	0.00247103065656559	36.3315285297793	0.0020724195437523	9.32389881605819	0.890757611109476	0.396444017299375	34.9048534358482	1571.69197501201	0.8324	4.01407932311293E-05	26486.1379144642	3.56110670008134E-05	23619.328441436	1.68931682075395E-05	10164.8971648246	0.881967674503274	34.0847018150389	40.8375108038029	1726.37337942956	0.9256
211.3848	135.1652	129.7824	14.3695765059378	31.8854498001832	35.3884818866252	-0.205318640045695	1.20580460507982	1.13880612328797	3.56802087057187	3.54902405534345	3.29549766910916	5.76487715284766	6.37264936034933	6.55178397823784	97	165	173	0.00360849645980849	47.5073469387754	0.00171213699047883	9.26062640656948	0.00245159713545272	160.121173469388	0.00150351613011954	9.62961348450237	0.00351686797167855	70.2171428571427	0.00167005141820169	9.30158313567146	0.00283565729328728	69.2082465639315	0.00165711095972699	9.48742483027788	0.904720264929632	0.431018078020932	43.6013320647003	1649.1151284491	0.8408	4.14415014752463E-05	25858.1474785918	3.70631246710921E-05	23693.9133058166	1.99165443556097E-05	9448.87963843958	0.892757372194075	33.5749574105622	51.6482112436116	1803.28790459966	0.9392
181.0484	157.1824	153.3016	21.5475580389055	26.9857801488117	34.8842347979714	-0.300105037482394	-0.442241728955174	-0.60461432009274	2.60684844046882	2.08366230559827	2.19067746922634	6.39624782412525	6.57620924702564	6.85466130441566	116	121	151	0.00122349021241149	32.8955102040816	0.00195709485387611	9.99377600153409	0.00093240952843721	104.604591836734	0.00180784841888606	10.3421442566037	0.00109121199500208	50.333469387755	0.00189691033788178	10.1479842034613	0.00105970700463034	54.2353186172429	0.00191588231443089	10.171476716184	0.939721614393387	0.135229759299781	31.1041575492341	1953.01487964989	0.914	3.96024641860616E-05	27158.7378555799	3.74080848726393E-05	25405.7055889861	4.76365116185926E-06	4053.65164113786	0.928489501216908	31.634460547504	35.085346215781	2095.36876006441	0.9936
183.8572	145.5972	146.9804	20.3853871231331	31.2771826122495	40.1735736005648	0.449557241588095	-0.417436863743151	-0.469185561303527	1.55680691073311	1.37453315972889	1.4168925044404	5.52654954900101	5.69734812093783	5.89135168420949	65	97	120	0.0102563931695127	6.99061224489796	0.00321095088192067	7.62804792706526	0.00706158313665602	29.6857993197278	0.00308567717140851	8.18576982542655	0.00851378592253233	20.4848979591837	0.00317136217726481	7.98793830441961	0.0073992146476522	23.9100374843815	0.00314846988569769	8.14205406882129	0.780135786025324	1.24660766961652	56.1681415929204	957.107374631268	0.678	4.09369177823304E-05	25297.1864306785	3.16683360027523E-05	19841.2194575758	5.48995294738457E-05	29650.8607669617	0.801949534433402	38.5196506550218	69.6297913634158	1239.16205725376	0.8244
213.814	108.4856	98.8768	12.9636801873542	24.5968004553438	27.9161892413703	-0.56202571362865	1.91926579937011	1.87813449566777	3.92807460166889	7.32659976309327	6.69873709015555	5.56278747603941	6.13602014863517	6.24147168423341	89	150	166	0.00465939192003335	39.2089795918367	0.00234554896275777	8.66008367527012	0.00322565250590025	157.006802721088	0.0020316795837706	9.11167462907587	0.00354352353186179	85.3812244897959	0.00216838171299727	8.97318792635152	0.00319265140288447	83.3740108288212	0.00221088921614778	9.06632686328857	0.879070418539065	0.501726689689196	36.3468179575728	1486.42377898372	0.8108	5.37058574713404E-05	19981.1159348791	4.71605097201582E-05	17722.7350982708	2.73393458940133E-05	9180.80217069561	0.872646184741317	34.5378555798687	44.1833698030635	1662.17636761488	0.914
209.5524	128.2248	120.716	15.0446287504877	16.6080421772104	18.1589246377642	-0.794113535420037	2.23126145924743	2.32143705049198	2.92863171351445	9.83836011620338	9.87554377446487	5.51363810113456	5.59477466936407	5.64733317073087	85	133	138	0.00523082049146191	25.174693877551	0.00445527983293632	8.42516176829277	0.00380736903604975	77.3039965986394	0.0038852714901362	8.85680442549111	0.00532744689712621	30.0857142857143	0.0043482266072504	8.46372008188032	0.00415781915108613	28.5439400249895	0.00438941177527433	8.67341602883398	0.835283519042918	0.766081871345029	48.4481658692185	1229.59649122807	0.7524	4.3346190323431E-05	23634.7809675704	3.58172459681565E-05	20007.1657924362	3.49556837594502E-05	16833.8256246677	0.854391892164215	35.7676311030741	57.6943942133816	1533.53164556962	0.8848
220.4108	127.3284	120.4956	6.94749187549003	20.1494951162554	23.8316508165087	-0.379211323814879	1.76990894215466	1.58382968648503	4.47548389220186	5.61163607328629	4.95098059850985	4.67537128530829	5.55379721800753	5.89824697112143	50	107	120	0.00992319866722207	26.4428571428572	0.00430202065813513	8.08509684759725	0.00715883717432572	77.4366496598637	0.00375603361889279	8.52394399880455	0.00866738858808838	39.1167346938774	0.00426028714017626	8.2990161335917	0.00737631706627874	48.0116618075802	0.00411782708564525	8.40075755405925	0.843545920710158	0.824654622741764	61.7438894792774	1258.30074388948	0.7528	4.11875245330381E-05	24844.8905419766	3.40455778180978E-05	21435.7700583845	3.82454583874399E-05	17601.537194474	0.850405493941625	36.1850159890361	74.8008222932846	1502.63636363636	0.8756
206.4732	143.7436	140.3444	12.2459659382182	20.2490162486971	25.4845715804681	0.00682904425083713	0.0155305779702449	-0.13275564609131	2.54086133282804	1.78948859525117	1.7254334471588	5.59755117073437	6.0241683617801	6.38785406281657	70	102	114	0.00405597667638487	11.0102040816326	0.00601493141360463	8.62358523748422	0.00251197417742607	59.0212585034011	0.00507075646997378	9.39497627414818	0.00302673885880887	37.5134693877551	0.00551839428514988	9.19583711138525	0.00280929038140257	34.4839650145772	0.00555306872284918	9.18643427676328	0.883162727800341	0.491442542787286	50.7144254278729	1514.46699266504	0.818	3.80210022847544E-05	26581.9687041565	3.34946326768228E-05	23522.5387192395	2.00834896847713E-05	12183.7716381418	0.899266834370862	33.1177460050463	59.5138772077376	1856.68797308663	0.9512
220.7728	207.898	180.0432	4.75549999053727	5.6599996466431	6.75228359593997	0.155920094891805	0.183380131672787	0.862788874472058	4.13585456786857	4.45512319533345	4.98275040112131	4.24740299113699	4.48820514314143	4.697623152536	40	48	53	0.011580508121616	3.94979591836734	0.0317514633167153	7.15512779053567	0.00841373964551801	8.86394557823129	0.0289054876565001	7.59393417189576	0.01293527696793	4.42897959183674	0.0323119345227214	7.07843699183494	0.00953215904590632	6.91336942940441	0.0304184427226156	7.45406239755847	0.823350031086726	0.669695350080171	103.66060929984	1184.20577231427	0.7484	2.28098418375487E-05	43547.5863174773	1.87733283136025E-05	35874.1609034966	1.53382439908119E-05	29010.4596472475	0.828655622181146	36.8186046511628	115.140465116279	1388.82790697674	0.86
181.9668	160.5576	128.0848	19.9029268641574	20.1506794485943	17.7151914739864	0.903813559200076	0.715805526297251	0.480057266741106	2.69044171801632	3.02868250784464	3.2727516251094	5.79980695270632	5.97660618497456	5.91488944454528	90	107	105	0.00446680549770929	8.96163265306119	0.00256995988397909	8.7597597136761	0.00302210595122397	29.5744047619046	0.00260420362838294	9.18131458352304	0.00408629737609333	13.2951020408162	0.00262299600335351	8.83409207499503	0.00384557940508267	12.3656809662641	0.00262425991017979	8.90813435904587	0.853194364292418	0.61439588688946	42.7367609254499	1332.2442159383	0.778	3.87216851265418E-05	27014.9434447301	3.31290730838348E-05	23042.9125350687	2.32358857810088E-05	16711.323907455	0.882767184800432	34.1984402079723	52.2772963604853	1726.54072790295	0.9232
219.6072	227.116	229.8288	3.92470485004924	4.46068873605859	4.56090896203816	-0.391496935784248	-0.813671631493765	-0.85523350453993	2.91077514262162	3.89247725790383	3.86981197658518	3.96207384792339	4.1031233159282	4.13175180191572	23	26	28	0.0198007496876301	1.36816326530612	0.0533950880882923	6.18550498163784	0.0141491970938035	3.24404761904762	0.0535492693147605	6.67553404855855	0.019181674302374	2.17795918367347	0.0548474807964307	6.32151131157831	0.0153439815181825	3.10204081632653	0.0536986878573509	6.57429577850644	0.713308640264022	1.9063122923588	105.871760797342	709.006644518272	0.602	1.95732190841731E-05	50714.5182724253	1.39614567066042E-05	36176.1795265094	3.72356170111413E-05	96860.8219269103	0.772721536299584	40.2234580384226	128.344792719919	1098.68756319515	0.7912
223.5516	230.7628	232.1816	2.91865336071278	3.52660405489474	3.98515011511486	1.27336719623331	-0.536781810326862	-0.842861668787703	12.8606759940037	4.82495901262423	4.2773098088558	3.42520629827517	3.69384159266335	3.91407304925379	35	32	29	0.0377572678050813	1.31469387755102	0.088165104162555	5.44047587171839	0.0308262760886668	2.14285714285714	0.0880182204373471	5.74673684997995	0.0393995835068722	1.24408163265306	0.0919656549365581	5.46127819908384	0.0301243702948289	2.19700124947938	0.0882780387781325	5.79379593491305	0.629657666993052	2.94668697638995	121.984006092917	494.224676313785	0.5252	1.8951751710773E-05	52358.7768469155	1.1936753894128E-05	32963.8324537039	5.57582832580404E-05	154460.182025895	0.675714127553728	48.1971326164875	141.36798088411	710.244922341697	0.6696
216.6576	221.9332	222.4236	3.94303972082453	5.60556310819886	6.52271132582149	-0.207785228699101	-0.609605586630357	-0.836742617360538	2.41227578942251	3.20518479038543	3.71258253898401	3.9612905695548	4.42772909834652	4.58658285764473	22	30	35	0.0164611411911703	1.18244897959184	0.0368673185210274	6.37128018282315	0.0108172520708964	3.15178571428571	0.034424326630638	7.0068941643766	0.0134873802582257	2.25714285714286	0.035778239788946	6.72789271805534	0.0110295220945181	3.04539775093711	0.0349986534604028	6.97205604323259	0.701668460441863	1.65877712031558	88.7475345167653	696.718606180145	0.6084	2.04301992181491E-05	48611.1406969099	1.43362933933891E-05	34104.9148791457	3.39171596379056E-05	80563.0795529257	0.78292105701578	39.8916750250752	108.61183550652	1138.80942828485	0.7976
204.9676	201.6796	189.2836	6.89191919859773	13.5139980701493	23.8737674245185	-0.42533338160351	-0.270827667533882	-0.349794800159424	3.88494508994063	2.49703898718464	2.27955074678687	4.7428653167979	5.6972485441564	6.43862103855491	46	71	100	0.00573594335693462	3.43183673469388	0.0065269650000878	7.91001573284644	0.00389775382942291	10.4961734693877	0.0067799544622183	8.48683326787015	0.00433419408579759	6.2591836734694	0.00631679719440995	8.36800364535477	0.00365546009307173	7.79925031236985	0.00646340356495521	8.56633890244012	0.788337777438719	0.884009009009009	39.7612612612613	1024.67454954955	0.7104	2.4983072613528E-05	40267.7460585586	1.9841711389673E-05	31513.0519159509	2.10382049903931E-05	37263.7804054054	0.844138395303709	36.2076852698994	49.3568161024703	1473.1527904849	0.8744
217.4804	223.384	223.6408	2.65375504521423	3.57588366701155	3.85348872581717	-0.140361707707466	-0.267549111794392	-0.171667969247802	3.0245293031506	2.76370129784277	2.44453225096146	3.43059407910055	3.83515981317677	3.9521686365068	18	21	21	0.0337509371095377	0.828571428571429	0.0927699146565553	5.46586884206664	0.0281035245730946	1.42729591836735	0.0923469813396062	5.73882511256344	0.0375686797167847	0.828979591836735	0.095255119322285	5.36753771492196	0.0282679315383133	1.33735943356935	0.0931945244251613	5.71801982487784	0.612106979493016	3.79383116883117	101.219155844156	438.905844155844	0.4928	2.01758208435457E-05	49167.6915584416	1.23405263140883E-05	30121.2082616728	7.64487898820085E-05	186704.566558442	0.662454863510179	50.4207582349285	121.44499689248	655.993163455562	0.6436
227.8744	234.7896	237.1636	2.65183420296217	2.85708449997546	2.83450790085334	0.0467883892133803	-0.729187365911161	-0.89363198038535	4.8149237394094	7.63947522595243	8.17482519568278	3.37831333969998	3.44518714218359	3.41466501846994	24	31	32	0.0415430237401084	1.43142857142857	0.12343975772047	5.38313620273871	0.0321954249386829	2.22321428571429	0.116305620804769	5.6705385972809	0.0433119533527697	1.22040816326531	0.124664501971338	5.30397779019045	0.0331357491785059	2.44231570179092	0.113681291710039	5.70558464267039	0.662446499392438	2.6468023255814	151.138081395349	565.139534883721	0.5504	1.82688068649382E-05	54309.2979651163	1.21092695056537E-05	35960.6681205894	4.83714469323797E-05	143629.268168605	0.711051131767189	45.1270376616076	187.330522765599	834.064643057898	0.7116
204.434	185.4276	153.5136	18.4274589675299	20.1403862485306	19.5994136402087	-0.85808037387479	-0.644273299484471	-0.346200421496514	2.51649461747126	2.30127377039376	2.03943256785365	5.68672343007969	6.01268409075382	6.04900573822271	82	98	96	0.00448613077884215	6.78938775510205	0.00261194803302585	8.58720913149204	0.00344149139247534	11.7793367346938	0.00260459944350912	8.86208284763133	0.00482565597667639	5.08367346938776	0.00267390472326307	8.43124927409051	0.00366968434816744	11.027488546439	0.00263691786679327	8.83471942833665	0.834218736176102	0.793693212185997	36.03153393907	1219.59861036879	0.7484	2.96635361900902E-05	35053.0812399786	2.50106787979064E-05	28990.4080626879	2.1627172649575E-05	29732.9230358097	0.853537951177347	35.5506072874494	45.3814664867296	1536.26495726496	0.8892
225.684	212.348	184.7788	5.73516730357537	7.79233572172041	11.8541921091233	0.583961879640226	0.940396566804018	0.99178104663235	3.33089184863473	3.43433733718592	3.27858007973459	4.47880952260749	4.81561196673959	5.30568173919864	33	45	58	0.00975493544356519	3.84367346938775	0.0170614317315155	7.41879680935845	0.0065091512795595	8.6704931972789	0.0164268986216112	7.92753657596694	0.00843781757601	4.29142857142858	0.0170717420064844	7.55958127384275	0.00707170984739979	6.4414827155352	0.0166874984640785	7.80435404310194	0.799786873465224	1.12193732193732	72.8336182336182	1044.28774928775	0.702	2.17475067710179E-05	45795.5458689459	1.73118396986512E-05	36809.3724071933	2.49513610843606E-05	50110.8245014245	0.841868683087191	36.175125743027	89.5002286236854	1464.09647919524	0.8748
227.186	234.7144	237.1372	2.83623059711301	2.84928633871712	2.69829134083034	0.559578242199237	-0.160404336304904	0.0909437673322233	4.23950180276041	3.31432620669403	3.11961800480631	3.49994660162063	3.52194595215005	3.46172287034946	22	20	18	0.032482465639317	1.21918367346939	0.123386555002355	5.53409816169577	0.0240011395714749	2.21428571428571	0.112839053342335	5.93592576885235	0.0339838400666389	1.13183673469388	0.124327858930876	5.49633140023265	0.0267299773227211	1.83590170762182	0.117006962253332	5.8127937798454	0.68985473106837	1.89430894308943	156.228997289973	654.123306233062	0.5904	1.82612601785237E-05	54325.3509485095	1.25822212233319E-05	37523.7470146372	3.49060363144929E-05	101961.610433604	0.738806326604292	42.4837679616817	183.896221394359	951.470463012241	0.7516
202.9904	184.7428	172.7144	16.074224953011	40.3213076196693	51.385655903569	-0.44747151140421	-0.495687815748342	-0.447630147157181	1.75098086404175	1.49963838526131	1.45726435595874	5.56820640889686	6.20588580920776	6.60407897134016	62	123	158	0.00376842982090794	14.9608163265305	0.000858505440665181	8.71298033740267	0.00327012182423992	19.4710884353741	0.000874595566500979	8.9133169573364	0.00456909620991252	3.70979591836735	0.000857351998009537	8.47131597568422	0.00324538522665396	16.4194085797585	0.0008587137277051	8.8913520615197	0.886255053921438	0.483365949119374	36.8649706457926	1528.73385518591	0.8176	3.13464842734422E-05	36322.7490215264	2.79647746542174E-05	31893.9577569831	1.44367568745208E-05	18814.2822896282	0.870685647135166	34.8817299205649	43.0520741394528	1640.51544571933	0.9064
231.6524	234.6564	232.8828	9.88398574665099	8.26481330944626	5.91251758221487	1.50467930629974	1.51190999461791	0.994922847020379	3.87241178661191	4.1494868019931	3.26317548645696	4.22914701471151	4.17588882086848	4.2615050221249	37	33	29	0.0261551020408162	1.9530612244898	0.0138682539077524	6.12717709754251	0.0201456858253507	3.81335034013605	0.0135592642958194	6.45741336361312	0.0257482715535192	1.97183673469388	0.0141686074740632	6.1000360339104	0.0205726095315345	3.41566014160766	0.0138066838098881	6.43004617809976	0.675806058717595	2.55093256814921	87.883787661406	591.971305595409	0.5576	1.82360186515823E-05	54609.356527977	1.22786383688023E-05	37042.7365723974	4.56995056350512E-05	142257.855810617	0.720360717538315	45.2659154929577	111.608450704225	852.696901408451	0.71
213.6412	199.752	171.0468	4.24797158182585	7.389999729364	12.518043367875	-0.37200971514074	-0.282803888242771	0.505949595975811	3.07691260648274	2.48426739409961	2.5557226398073	4.09174367611703	4.86420453272206	5.55100877312533	27	40	60	0.0124714702207414	1.60081632653061	0.0232265847970776	6.75243540337538	0.00989424256096994	2.6016156462585	0.0237981103114089	7.08649945307493	0.0134797167846731	1.14244897959184	0.0221055288436115	6.68802678152825	0.0108831163469476	2.15201999167014	0.0231311952173548	6.94308418743115	0.749690664066314	1.2098241358399	67.0509399636143	858.352334748332	0.6596	2.46942419354347E-05	40292.8392965434	1.85047613306347E-05	30231.6701415179	2.97452975394961E-05	48874.9963614312	0.766739929761182	40.9085772984078	79.0061633281972	1063.83410374936	0.7788
221.6988	225.9024	225.5532	4.82668401286017	5.2163659994291	5.41936986742924	0.211602393298974	0.209791461681639	0.0737787733397691	2.54878874898362	2.73885954230271	3.24096035718679	4.14098667822203	4.29776824974871	4.35970260883191	30	33	36	0.0255970012494794	1.16489795918367	0.0384745772552727	6.04608607785659	0.0215712347864316	1.57312925170068	0.040011714693021	6.26431647276777	0.028249895876718	0.83795918367347	0.0399825687004935	5.84381024682553	0.0212723734956332	1.8554768846314	0.0393105775664446	6.27586617168047	0.638897631577192	3.39377431906615	73.5665369649805	491.168093385214	0.514	1.97181926000766E-05	50379.540077821	1.26325624514724E-05	32105.3686755238	6.6498097262466E-05	171925.203891051	0.662431945012784	50.2710396039604	88.5457920792079	661.15099009901	0.6464
224.1444	232.4384	235.1108	2.3531146678392	2.8663226336196	2.90105555961964	-0.241582001695538	-0.626030492902267	-1.00834048095374	3.54931777422546	4.26926806742174	4.92650578709213	3.24916800676345	3.49167987921679	3.45473568803646	19	21	19	0.0452208246563932	0.833877551020409	0.137819288051303	5.09306592456073	0.0369659343329168	1.42899659863946	0.13344643359004	5.38518402129868	0.0455913369429405	0.765306122448979	0.140067612500054	5.05214357199036	0.036047905209564	1.2457309454394	0.134635353563549	5.37087230945608	0.5816085618445	3.69340016708438	129.985797827903	392.585630743525	0.4788	1.87187346702884E-05	52993.35839599	1.08997849882457E-05	30787.8921830908	6.91379756723152E-05	195672.176274018	0.648868871841005	51.6658227848101	155.508860759494	624.673417721519	0.632
220.8896	209.78	185.2464	3.57376717764322	4.10808958032806	5.84062385708924	-0.0430079008379485	0.031355537739372	0.602511883846317	4.92464834223662	5.62270700444808	3.94706536982487	3.82040286479347	4.00721871912881	4.46478180632667	35	42	44	0.0194039150354018	2.25142857142857	0.061801980565525	6.3134921730813	0.0167280560183258	3.57355442176871	0.0608607594677165	6.5275117171602	0.0230197417742607	2.09142857142857	0.0611231366483324	6.14704478289223	0.0154962851276219	4.11953352769679	0.0576246112859584	6.64959264677568	0.76731660338554	0.973255813953488	132.461627906977	938.81976744186	0.688	2.24198552190146E-05	44251.9488372093	1.71973185157134E-05	33972.7220717252	2.18208066363316E-05	43033.8209302326	0.759871958648613	40.9424164524422	141.780462724936	1043.55732647815	0.778
226.31	233.1724	235.2584	3.82678716418878	4.24097609519318	4.4248875059147	-0.0470192876951275	-0.144396372638105	-0.685246852750986	2.38717027692244	2.50072567835031	3.91213649801969	3.95189403399295	4.09386350349424	4.0759821825555	20	23	29	0.020687713452728	1.1665306122449	0.0610076801897249	6.04338914378372	0.0139969891017631	2.75042517006803	0.0580068978684488	6.6057126642006	0.0176606413994169	1.87102040816327	0.0605304256188785	6.31094687763135	0.0147333793482203	2.67388588088296	0.0585029654796344	6.5634412160023	0.681087152343301	2.17647058823529	99.6624649859944	615.697478991597	0.5712	1.85470140511685E-05	53516.6050420168	1.26430884718252E-05	36416.883013366	4.02891943394036E-05	116690.307422969	0.756847459376875	41.9978969505783	121.361724500526	1011.60042060988	0.7608
220.0924	224.6088	224.6208	5.03403041707139	6.5859063582775	7.19256611787476	-0.7028585003738	-0.881199413758302	-0.849786317259653	3.14159033200607	3.53573055584192	2.97261606266116	4.2562309737744	4.5854119051687	4.62897532986398	30	42	40	0.014840149937526	1.88448979591837	0.0261368638060401	6.74027154168131	0.00952511106483409	6.57312925170068	0.0241980544159893	7.41332117884455	0.0112709704289879	4.73469387755102	0.0249258572500291	7.19530566428833	0.00951168999589057	5.87213660974593	0.0245091467177074	7.38309823029001	0.727055806013216	1.5379746835443	79.6987341772152	774.770886075949	0.632	2.00281074118686E-05	49647.8443037975	1.46035743706365E-05	35998.9945785648	3.01842110250169E-05	77838.2905063291	0.817793749427756	37.8711832061069	103.560114503817	1316.03625954198	0.8384
223.476	232.7332	236.7072	4.57513103637481	4.72224710916318	4.47480370072252	-0.840877048022537	-0.78308663762307	-0.985061334753657	3.713448840576	2.97890532456001	3.48065876606556	4.06378284363024	4.10015146246102	3.97118498027694	27	26	26	0.0232713036234902	1.4665306122449	0.0471480134664352	6.1922921238231	0.0191044530056921	2.65901360544218	0.0470143542628618	6.53151021613008	0.0252088296543107	1.30040816326531	0.0466004418975462	6.13037624408059	0.0189833092243774	2.2082465639317	0.0459916509125092	6.46755566013252	0.731368582347814	1.84635416666667	103.725260416667	760.046875	0.6144	1.87729879943532E-05	52898.9733072917	1.37633646604682E-05	38597.050516577	3.42540467748355E-05	98764.314453125	0.760065719114405	42.2583201267829	119.323296354992	1015.99841521395	0.7572
209.7112	212.6152	209.736	8.99238536540778	9.21537459683544	9.92463117702618	-0.582658749439694	-0.461525785491573	-0.376267433497785	2.07948219506639	1.93386418418029	1.83112018722788	4.73246532484275	4.82756271969823	4.99199714642384	41	42	42	0.0160386505622657	1.52326530612245	0.0116805904141826	6.74361565864681	0.0120298544587903	3.0046768707483	0.0117344246729532	7.17966336715762	0.015343273635985	1.67224489795919	0.0118320117122825	6.80875083929069	0.0120671988504026	2.74802165764265	0.0117935634875952	7.1234637179019	0.632617878863293	3.56896551724138	54.6222570532915	480.540752351097	0.5104	2.22420595409376E-05	44869.3252351097	1.40319679098163E-05	28453.788663525	7.89639495451392E-05	161033.550940439	0.747954753464536	43.2362459546926	69.2891046386192	962.173678532902	0.7416
198.1712	168.9192	148.0996	17.3717325146342	39.4216066562488	50.3710321498379	0.031431587566288	0.276948372859924	0.395218268570589	1.61240497686986	1.41492600330885	1.39951440328459	5.76928782533358	6.45899002203685	6.54900849831435	68	119	151	0.00301374427321947	20.994693877551	0.000882560900625638	9.02428581626796	0.00275167464945165	25.5501700680271	0.000877754823281507	9.15613704509684	0.00447480216576429	2.42734693877551	0.000878083825379911	8.45087691935799	0.00271388379234598	20.0370678883798	0.000882196668101074	9.16733007114071	0.896171230077201	0.403643336529243	31.4362416107383	1600.52924256951	0.8344	3.58709311371899E-05	31477.9467881112	3.21516725411029E-05	28055.0091098469	1.37556081748392E-05	14116.4439117929	0.876846439344195	34.5943933420937	36.0696452036794	1682.17389399912	0.9132
231.382	234.0468	231.2588	12.2244049343925	10.4567207938244	8.45599329233414	0.749560527072734	0.669830581399446	0.0502045962160444	2.51989351208013	2.63915835573484	2.15249230852934	4.88919319599035	4.83706454604408	4.91986443565881	43	40	38	0.0158220741357768	1.77795918367347	0.00867977839969508	6.74929424557943	0.0128888715350085	3.66454081632653	0.00857298778760832	7.07013618048271	0.016390837151187	1.71673469387755	0.008850964081894	6.71103895737141	0.0136127855931193	2.72969596001666	0.00870974448103056	6.99481985472822	0.667212722001492	2.99559471365639	50.2202643171806	566.323054331865	0.5448	1.83216213845157E-05	54500.9486049927	1.21424734516353E-05	36593.230144965	5.43463098566042E-05	165625.809838473	0.728096586329838	44.4163898117386	65.7995570321152	886.847176079734	0.7224
219.6516	224.5628	224.2608	4.16689541985397	5.36980969495195	7.10627774295376	-0.688353401150217	-0.719252750788567	-0.765243727637396	3.10911664963501	2.75997668828193	2.53192903538009	3.94185048088044	4.26786690604396	4.58218456640287	25	27	31	0.0199993336109954	1.10408163265306	0.0374376372580981	6.18370823219053	0.0135960421583599	2.9047619047619	0.0362723609890238	6.79964231167231	0.0159027072053311	2.18734693877551	0.0362435389997888	6.58862726419493	0.0131728744843057	2.95127030403998	0.0359497020501457	6.82276949532149	0.673087472519784	2.45389563974267	94.1865618298785	590.328091493924	0.5596	1.99084211134901E-05	49886.6697641172	1.33856115045766E-05	33612.7637532443	4.92197946822765E-05	121522.73838456	0.776337158829972	40.8209718670077	113.005115089514	1097.12583120205	0.782
213.6716	196.0208	163.6268	11.4644735352305	14.1569900529738	15.5245200170569	-1.76378525946744	-1.25084691939077	-0.824251225505332	6.02394409305724	4.29974251042274	3.25899849442116	5.02768852679313	5.51268375118257	5.70857068747083	70	79	82	0.00700474802165764	4.98857142857143	0.00545762438788261	7.97669503975162	0.00525605650423438	9.22619047619047	0.00556908118646816	8.32934425219671	0.00773077884214911	4.3130612244898	0.00583284900536597	7.82184451729488	0.00557191826743023	8.46147438567264	0.0056848604501405	8.26349970603988	0.822242018059668	0.858464888405008	55.5258573761568	1159.94719651606	0.7348	2.57600850228282E-05	39264.2389765923	2.11874627290098E-05	32303.6061232249	2.21205540067014E-05	33493.6570495373	0.848176015962419	35.8079710144928	66.4619565217391	1503.50905797101	0.8832
184.0296	166.3156	136.8868	20.4388826465636	22.5802036447858	21.2949849908376	0.384619661304148	0.36795410570168	0.306611088794631	1.52117510877576	1.59483008457476	1.72295664959709	5.6494958739156	5.96425114314619	6.03006205267137	68	83	90	0.00355751770095797	11.8702040816326	0.00210827267046393	8.76633405053256	0.00298342125966035	17.2929421768707	0.00208031329568929	8.97654405463315	0.00431520199916704	5.30938775510204	0.00211684744668747	8.47436821608994	0.00329013959024776	15.4864639733445	0.00210565190264915	8.8581079984573	0.882475641298186	0.462890625	38.6220703125	1513.357421875	0.8192	3.6499697436806E-05	28739.3310546875	3.21397127861991E-05	25355.4141323486	1.71356129260786E-05	13500.0258789063	0.872279835947106	34.5742444152431	44.8151554971529	1658.94393342094	0.9132
217.01	223.8516	225.8416	7.53378390982911	8.17928954371955	7.79326051405957	-0.179316238352523	-0.320395906442463	-0.458152275967051	1.84614592041375	2.28703420651125	2.53733642962754	4.69936602232068	4.95055826914478	4.87307523240136	36	44	41	0.0101874219075385	2.00571428571429	0.0158325876482913	7.18534955205903	0.00653988210930632	4.96003401360544	0.0151908097057336	7.77447965551391	0.00799500208246565	3.01673469387755	0.0156385678330464	7.46833177265642	0.00689234545997339	4.36984589754269	0.0154150305321304	7.70190410643531	0.74285815679593	1.55793450881612	58.2506297229219	811.070528967254	0.6352	2.02303529107186E-05	49254.3513853904	1.50658301313849E-05	36507.8874136072	3.12571279504481E-05	77272.661209068	0.800988875981648	38.9089574155653	74.8228095937347	1225.75477239354	0.8172
213.756	188.5312	147.7876	6.9348730341658	4.82984746757079	4.53661616626313	-0.19233966756857	-0.625807971283019	-0.125292708355902	2.05835682802293	2.78064752475361	3.8160116094856	4.65157224595952	4.16691069300142	4.16749361075722	33	30	35	0.0194355685131195	2.14326530612245	0.0395283219202818	6.45003079374234	0.0153505917673191	2.95918367346939	0.0390629883219508	6.65915438551596	0.0219815077051228	1.09265306122449	0.0402785747300211	6.04927209446373	0.0159806036669783	2.95751770095793	0.0388468360600974	6.65893413813304	0.745370071843072	1.76815286624204	88.715923566879	807.16050955414	0.628	2.7261415141017E-05	36401.2522292994	2.04073215100613E-05	27015.162543407	4.6747684598565E-05	66302.6140127389	0.764097833947409	41.1631388745483	109.671140939597	1050.78420237481	0.7748
225.7236	231.7712	233.2244	4.96612555620576	5.82185971661977	5.92847743016704	-0.771644763039091	-0.653929434589102	-0.514835909125842	3.17448361441598	2.86112066958607	2.42243601178652	4.21226990732471	4.42830303208262	4.44333179394966	26	31	31	0.0176509787588505	1.56979591836735	0.0328081391678823	6.49219937754594	0.0105977977925864	3.70025510204082	0.032190173207362	7.1153568781024	0.0130642232403165	2.4734693877551	0.0328985547275584	6.82239039000997	0.0115891251059664	3.72178259058725	0.0321523407214296	7.03669817696119	0.714688829364228	2.03530979347102	80.5669553630913	710.544303797468	0.6004	1.88161901146985E-05	52813.3484343771	1.34931144041548E-05	37619.6312400236	3.79479435991657E-05	108409.013990673	0.797606668640129	39.0737100737101	107.401965601966	1209.64373464373	0.814
220.1712	224.6808	224.4332	5.46306604023784	7.3463263853439	8.08558827544415	-0.493107490351089	-0.64982832592882	-0.568565963054983	2.81807591767757	3.17099983860622	2.86814921920345	4.37851028564119	4.78432299984435	4.88302856366529	32	44	46	0.0118790503956685	2.82693877551021	0.0210078598190531	7.02972087036593	0.00779586919801935	6.31335034013606	0.0209729206440566	7.59618726546203	0.00876368179925031	4.4526530612245	0.0212808805601335	7.39616858147779	0.00736590907474516	7.07663473552686	0.0206179431649646	7.66581099601162	0.75381001468343	1.58560794044665	67.8312655086849	848.232009925558	0.6448	2.00677432556071E-05	49589.814516129	1.52002654063285E-05	37210.5949517803	3.11283465729971E-05	80272.4125310174	0.81837559873801	37.9031026252983	86.8701670644391	1317.56515513126	0.838
224.4768	231.818	234.1712	3.48549304403265	3.71559900958109	4.11216373214881	-0.181943765726266	-0.829229902337114	-1.25406175583876	2.84270995584638	5.34000121747347	6.95835228036012	3.80682978009362	3.85340773442723	3.93528545619437	24	32	32	0.0260281549354436	1.68816326530612	0.0760547862670604	5.87226065695102	0.0198676622009348	3.51190476190477	0.0757058916084145	6.26720938236047	0.0241895876718034	2.13510204081633	0.0761485128029448	5.97973921112925	0.0206985462290893	3.04914618908788	0.0747083535985277	6.1991940745736	0.669664053988836	2.11549295774648	112.72676056338	594.69014084507	0.568	1.87592600519851E-05	52902.2183098592	1.25544222362178E-05	35452.5053275887	3.96841311146103E-05	111886.828169014	0.722461395424574	43.9599121361889	134.615595826469	881.302031850631	0.7284
216.7888	223.412	225.5188	4.11312467109861	5.48290579893545	5.61890083201332	-0.279224907732422	-0.554110928071968	-0.529927084455703	2.78674458043935	2.74829089338647	2.89413407151843	4.05421356110472	4.40389953333783	4.47101363877304	26	31	32	0.0148598084131612	1.50938775510204	0.0373892506909649	6.55534323450213	0.0101762431162941	3.82227891156463	0.0354577389257794	7.15227737080373	0.0136426488962932	2.29755102040816	0.0367282697035026	6.78143210231517	0.0108976875350944	3.0341524364848	0.0361050710362274	7.01392425261413	0.727592617576834	1.53223767383059	90.8798988621998	776.546144121365	0.6328	2.0181206800248E-05	49215.5170670038	1.46775755091745E-05	35825.5304013191	3.1017627753012E-05	75147.1061946903	0.783043848241053	39.6311066799601	106.941176470588	1145.79062811565	0.8024
222.2192	229.7104	231.9272	3.49936442229157	3.93620779939271	3.83253182113339	-0.288455818402943	0.0902829002842864	-0.0407808077608888	3.77906249602613	3.25285213124898	3.29782179235473	3.81198868839459	4.00537430408716	3.95786564427871	26	27	24	0.0219478550603915	1.56040816326531	0.0688598265607813	6.12954966074653	0.0162439550650192	3.08078231292517	0.0637116945855496	6.58297826156702	0.0221487713452728	1.67591836734694	0.0681931398066297	6.17321598858655	0.0171553189780532	2.67513536026655	0.0655691657586972	6.50614879511815	0.725657407387587	1.41661422278162	122.006922592826	776.285084959094	0.6356	1.90801249384161E-05	52012.5122718691	1.38197680492913E-05	37815.8523158736	2.72206118624299E-05	73134.0962869729	0.765717998643475	40.8819907644946	138.779374037968	1062.12673165726	0.7796
223.4392	208.7648	177.62	2.71232434638632	3.5197558097118	5.28677595515452	-0.150242946952578	1.12019990137782	1.70530511577663	6.14448560360377	7.66483314192936	8.00491419072523	3.39656055029746	3.72739361630563	4.19233390843713	30	35	42	0.0318247396917952	1.52979591836735	0.0929957343744631	5.65806363654615	0.0242845862834931	3.23426870748299	0.0872825707488288	6.06930042825641	0.0321576009995836	1.80326530612245	0.0891428225802463	5.73638778933577	0.0255049567192345	2.5926697209496	0.0876817665273337	5.97779681214461	0.722842575774341	1.95802798134577	141.401065956029	725.698201199201	0.6004	2.2541084814398E-05	43993.7508327781	1.62731305798273E-05	31846.9545436235	4.41590904898004E-05	86037.1925383078	0.75558983977218	42.3283976731888	166.60549973559	1002.69751454257	0.7564
217.9836	221.6392	220.9408	5.94065072529938	7.97251675194226	9.12204447259495	-0.703908507495547	-0.911644973781101	-0.941777271179936	3.40983160459112	3.74987103314984	3.89252838643829	4.51961586745569	4.87977612503324	5.05489949639215	36	47	56	0.00901790920449813	3.89020408163265	0.017389236890854	7.37748488690762	0.00605144268591791	7.15221088435374	0.017231294976318	7.83944171742392	0.00742890462307372	3.63591836734694	0.01795982987603	7.52952976006124	0.00596811581180339	6.77967513536026	0.0173339087315821	7.87004925927063	0.79871424866554	0.926091825307951	72.9955207166853	1059.03807390817	0.7144	2.05543337954491E-05	48455.889137738	1.64779069759664E-05	38570.0968925502	1.87083848157461E-05	45588.4490481523	0.849574792160671	35.7625508819539	88.6598824061511	1511.17639077341	0.8844
182.034	157.4644	133.4184	26.4737916438126	39.0926275995871	39.0037965003408	0.0373075304512468	0.0782264757550235	0.156715546848449	1.26111440431798	1.18399458896488	1.27733157257022	5.79097779637013	6.07610540883724	6.28353761681603	85	117	129	0.00326797167846729	29.6204081632653	0.000796066863539311	8.96275719686431	0.00271407457540841	38.1585884353739	0.000795785573646247	9.1773409828799	0.00488563098708874	3.08081632653062	0.000803858421141111	8.35200316881729	0.0027655768169621	26.7197001249479	0.000796054590990297	9.10386958304812	0.895988040115951	0.386081982840801	38.5948522402288	1605.33841754051	0.8392	4.41931716177555E-05	26828.3374642517	4.00220078778487E-05	23704.3747552955	1.37326999358688E-05	12688.5352716873	0.869796327025282	35.1252776543758	42.3451799200355	1629.28964904487	0.9004
221.4972	226.7592	227.6696	2.9202041298512	3.16815646078283	3.19831765776947	-0.225419579116268	-0.322595104411662	0.059129049007543	3.09988120257264	3.75380582669402	2.74127102235652	3.56435930340901	3.67978565528502	3.69491829410219	22	24	20	0.0299641815910037	1.04857142857143	0.102361718902713	5.5919303897343	0.0214316806654635	2.29549319727891	0.0940746290716617	6.04887905588329	0.0288633069554352	1.43020408163265	0.100357558252772	5.70042250609855	0.0227915933264652	2.04248229904207	0.0962788721872959	5.98827003435282	0.657360288001171	2.24498567335244	127.110315186246	565.998567335244	0.5584	1.95562307901617E-05	50722.5042979943	1.28624806880498E-05	33325.9316740454	4.37586377725239E-05	114230.143982808	0.711204820676103	43.910989010989	153.654945054945	856.912087912088	0.728
222.5432	228.9904	229.9904	4.93721923353622	6.4517833069625	7.01808434261088	-1.15935239461909	-1.56728601881233	-1.5162550023264	5.01379574163488	6.3582023474154	5.79080727031773	4.15800919710277	4.44450197763343	4.527564992522	33	44	45	0.0199130362349021	1.39877551020408	0.0268542480542558	6.36519432181531	0.0144496361469758	5.0514455782313	0.026881282097125	6.88129062066994	0.0168952936276551	3.76816326530612	0.0276196198087227	6.62170539683554	0.0135517253761231	4.57267805081216	0.0271814144041589	6.8682677034508	0.679971892999485	2.02412129565817	82.1771192281185	626.119228118539	0.5804	1.93423504519258E-05	51428.2474155755	1.32038625427123E-05	34853.661012978	3.84560499239704E-05	105803.786354238	0.767088453882103	41.6125	102.176041666667	1050.54166666667	0.768
218.2452	203.91	173.1656	4.60446272218594	6.34112765996711	6.85528822442937	-0.587024253872821	-0.54404704226067	0.00159531828942203	4.40844836867888	4.01525439874243	3.92966342925295	4.1201706677511	4.59161014744741	4.7559392430708	33	41	46	0.0122339025406081	3.9469387755102	0.0289675216681933	7.08048688580333	0.00841265502799754	7.51828231292517	0.0270533589903376	7.55296863469988	0.0129649312786339	3.79265306122449	0.0285955721112816	7.1127828062301	0.00992974432248395	7.08788004997917	0.027644919827208	7.4667593820238	0.80491853016473	0.820286659316428	100.326350606395	1093.28665931643	0.7256	2.36911417545095E-05	41939.2668136714	1.90705472126288E-05	33757.3066979497	1.94625791180649E-05	34320.3478500551	0.826870013951347	36.9319029850746	112.918843283582	1378.37126865672	0.8576
218.0972	223.6112	224.2792	3.25818233989444	4.20818661183175	4.49279950142447	0.0208374918691955	-0.156034857952255	-0.494918779733831	3.21245224258126	3.0113665134215	2.80813380787163	3.67715362862589	3.9953916529306	4.0485611949765	21	25	25	0.0298428987921699	0.798775510204082	0.064606571886583	5.62531008876774	0.0212491033828498	1.86607142857143	0.0635814833530416	6.17267676043619	0.0252681382757184	1.26	0.0636645578769496	5.95119746239734	0.0220571360572551	1.59308621407747	0.0633409454362756	6.09125527301585	0.606223923059266	2.81467181467181	109.227027027027	459.633204633205	0.518	2.00370616329676E-05	49524.5258687259	1.21049278779928E-05	30128.891019081	5.71988735266391E-05	137415.044015444	0.733973231758236	43.7842708902239	132.181867831786	914.755324959039	0.7324
226.344	233.7936	236.2192	5.0241878945756	5.27816246813226	5.00247452367326	1.37975313861651	-1.51632181512464	-2.09168657607179	11.502054385198	11.3033758258977	11.8409219931191	3.88606296164437	4.02504347820381	3.95017561505252	50	52	46	0.0283651811745105	2.09469387755102	0.0389112124001183	6.01682898657672	0.0204450402610025	4.31675170068027	0.0377401924798483	6.43230675973315	0.0261157850895459	3.33551020408163	0.036981201756761	6.19813680820867	0.0220300752792681	5.54602249062891	0.0358723833583658	6.42251719195211	0.709748754845784	1.64257555847569	120.407358738502	710.462549277267	0.6088	1.84933652983891E-05	53746.3593955322	1.31429834099113E-05	38116.3283190213	3.02732064865011E-05	88409.4888304862	0.762213856803135	41.0072090628218	149.048403707518	1047.97322348095	0.7768
211.4816	203.4444	195.6312	13.1385562920741	33.0808662014767	42.8594352104644	-0.934506183312955	-1.25579215739599	-1.16246063126182	2.62560297793479	3.15323991145269	2.95838406111892	5.2367716524099	6.04735246951262	6.40189259105733	56	116	144	0.00566030820491462	15.8371428571428	0.00128846081676073	8.44290038635365	0.00411756964690639	24.6828231292515	0.00137013943650786	8.81009077738026	0.00554002498958767	4.39142857142858	0.00125902800558179	8.39347586517895	0.00450891539881429	14.6413994169097	0.00128579928530366	8.67897204366379	0.851768506655856	0.572159672466735	39.2476970317298	1332.73899692938	0.7816	2.61332107851342E-05	41652.9170931423	2.27179684335793E-05	34783.1009702758	1.25287676472811E-05	27325.0194472876	0.842532314267133	36.1296803652968	47.262100456621	1468.47214611872	0.876
212.7804	206.5748	199.9572	12.242784644026	30.4427791924456	39.6633151433412	-1.11028515548425	-1.46964859054258	-1.35598423237254	3.12261723860293	3.91954439902195	3.59998480933875	5.1351474292082	5.98328725544337	6.32244697480609	55	116	144	0.00553302790503957	14.5057142857142	0.00153014674779195	8.42165350672732	0.0042235006247397	22.7253401360543	0.00167831214721006	8.76421920929533	0.00586488962932112	4.5857142857143	0.00147992065427475	8.37343283767697	0.00461681157771101	14.006247396918	0.00152900687537344	8.63306088519746	0.854193403129573	0.507598784194529	43.2482269503546	1353.83282674772	0.7896	2.50864130271764E-05	42821.2553191489	2.18399198530965E-05	35950.2597248959	1.09934638616902E-05	24308.795845998	0.848644364171358	36.0624145785877	49.7717539863326	1498.05421412301	0.878
228.564	233.7184	233.1368	4.50620727441604	4.85270042759699	5.34951266565469	-0.43076579688073	-0.635728355255853	-0.577902816521792	2.22338363836336	2.30453773743514	2.14858165174495	3.99783801660158	4.03679302690501	4.14191753072124	26	25	26	0.0281336109954186	0.687755102040817	0.0448055107446632	5.68308159252026	0.0231460994261651	1.25892857142857	0.0455746189857441	5.98460458048316	0.0304496459808413	0.784081632653061	0.0462142002455422	5.64987307909202	0.023515989537193	1.15493544356518	0.0456658300053798	5.95519823372473	0.591158767565222	3.33144704931285	90.514955537591	418.849636216653	0.4948	1.8421712771891E-05	53908.5222312045	1.08855072705052E-05	31882.2672965162	6.14832232215048E-05	179259.140662894	0.678894063949676	47.6508875739645	108.881656804734	723.831952662722	0.676
219.3252	224.9172	226.578	4.96574717036621	5.23984199761787	5.24289195005962	-0.571568540591888	-0.65766031506615	-0.806177017179965	2.67159267838809	3.22920868966272	3.12789552543481	4.21087734198979	4.32958436868021	4.23160616514697	28	31	28	0.0171891711786755	1.35265306122449	0.0371262504997322	6.4157033725839	0.0122344856309871	3.26360544217687	0.0356292508768886	6.94605251514874	0.0164278217409412	2.12489795918367	0.0364690600786383	6.60515744066019	0.0131669766224367	2.91211995002082	0.0358362674215159	6.85519054802308	0.721122854747974	1.84464751958225	89.7193211488251	738.131853785901	0.6128	1.99097873126473E-05	49888.1866840731	1.43627002774726E-05	35963.2694755764	3.64849823074746E-05	92604.3498694517	0.766033258911326	40.6647930505876	108.529892692897	1067.12979049566	0.7828
212.7612	193.4164	157.984	4.34991661529276	3.92599172693983	4.34333328216935	0.441880672862026	0.619255609352752	0.345218790306882	2.58964108416349	2.96348978373127	3.16734443590689	4.05683487048186	3.89288710794781	4.0870880757301	25	23	26	0.0273729279466889	1.30612244897959	0.0664272184637933	5.91733945423015	0.0223340824425009	2.44260204081633	0.0639564424957758	6.28522271168301	0.0319280299875052	0.917142857142857	0.0678967129133095	5.68092210448386	0.0252933275580545	1.35027072053311	0.0669058738750132	5.97983951559611	0.704057099071405	2.23224043715847	115.017759562842	672.516393442623	0.5856	2.59535092538612E-05	38198.8941256831	1.82443041349354E-05	26937.4051137283	5.84265070383312E-05	84517.650273224	0.734736198761458	44.6524153248195	130.340366463076	901.021099389228	0.7204
224.1492	233.5412	237.1128	2.47122224010711	2.89017344808231	2.72045513839137	-0.691801023418582	-1.01175955512401	-1.22792275676147	4.26436533251098	4.83899501019601	5.57045788702647	3.28055380714349	3.45866013588903	3.33059507812496	19	21	21	0.042467638483965	1.31142857142857	0.139086670729659	5.29728119788895	0.0328349877365912	1.98852040816327	0.141114592001593	5.59364659676972	0.0429950853810912	1.08775510204082	0.134321615110238	5.257247645018	0.0333380111473059	1.99666805497709	0.131811326205284	5.58862308775442	0.660528145852474	2.83592017738359	149.929785661493	551.189209164819	0.5412	1.86389978051667E-05	53223.6060606061	1.23470631096999E-05	35058.2876430419	5.25446080397463E-05	151789.495934959	0.719823400314311	44.9317291550084	189.616675993285	857.387241186346	0.7148
217.8132	196.9024	158.3964	3.90219242990399	4.27907399328406	4.74687971619252	-0.289344884160797	0.236765703166627	0.929480876926587	2.97924386418824	3.68768014449195	5.1059162419851	3.8764009587718	4.10925103121478	4.19189345930624	29	38	38	0.0215090379008746	1.36448979591837	0.0594522444117846	6.09427087904938	0.0162323858114675	3.13477891156463	0.0582519191483622	6.51986713023131	0.0228254893794252	1.9065306122449	0.0576865315850813	6.10817828730359	0.0181478944372928	2.57184506455643	0.0580744237533686	6.3462990588655	0.703535321340503	1.69565217391304	106.474308300395	698.068511198946	0.6072	2.50108952633029E-05	39657.2424242424	1.75500631175948E-05	27977.824257352	4.28048095305193E-05	66576.3801054018	0.749010457185441	42.8020331728197	123.400214018192	972.733547351525	0.7476
246.1904	235.032	208.1292	3.43262987226995	4.4253560308748	8.28249403018197	-0.510474895508587	-0.289888913953168	0.842134189587284	3.65561698091609	4.65898493883941	3.81808476431961	3.76550089453419	4.08549837746668	4.94253713507344	24	38	55	0.0229917534360683	1.46367346938776	0.0551592027400607	6.14256378786097	0.0172819340321163	3.30144557823129	0.0528622422620077	6.5416967639664	0.0209289462723864	2.30530612244898	0.0541777978638686	6.30347821150819	0.0157748723676671	3.36693044564764	0.0526151111418386	6.64281322658105	0.716084534545006	1.83862433862434	106.649470899471	717.769841269841	0.6048	1.79606894355106E-05	55291.3776455026	1.28745245871245E-05	39561.7843455898	3.28092086050429E-05	102240.865740741	0.753197149681621	42.3393234672304	128.813953488372	997.433403805497	0.7568
220.6044	224.3572	223.6552	3.06357644592068	3.77242735649078	4.75490409577312	-0.197479826647608	-0.160103315805886	-0.274014887027007	4.90218490400665	4.1182442201073	3.27655466758479	3.58850975876778	3.89946547679055	4.25757623918442	28	31	33	0.0274695543523532	1.33387755102041	0.0739338870769558	5.87694195042673	0.0185860058309038	3.81207482993197	0.0692083355687047	6.43812677405619	0.0211018742190753	3.22326530612245	0.0717276042459876	6.26715208702529	0.0186669062817606	4.35818408996251	0.0678022639970651	6.47927297847355	0.681275394423219	2.21059972105997	115.154811715481	619.788005578801	0.5736	1.99251479840148E-05	49801.369595537	1.35827447628422E-05	33913.7057136517	4.39631906302508E-05	110241.257322176	0.754866930964514	41.8704771893026	145.375458835868	1009.1017304667	0.7628
201.294	184.0276	163.2244	24.9484982313565	41.0196396649215	52.9965097401706	-0.718441844706296	-0.293636645735309	-0.011933037354206	2.43503603482557	1.65899855813771	1.31616919148617	6.12133501422304	6.63947804587665	6.82137757539049	106	152	170	0.00314202415660142	25.6008163265306	0.000724543796435583	9.33369516124677	0.00217755044194548	32.5884353741495	0.00072646030823348	9.64016626996083	0.00294977092877968	9.84163265306118	0.000716449382143821	9.22543743044711	0.00220076980974713	37.0116618075802	0.000721636086011443	9.60507681942966	0.89564715381576	0.398854961832061	26.7910305343511	1602.82347328244	0.8384	3.39668726806514E-05	34691.7690839695	3.1209627641448E-05	30208.7558971091	9.11268269997185E-06	18714.9923664122	0.878639925374389	34.1598094413166	33.2156777825899	1705.63923776527	0.9236
229.8408	230.62	226.1572	5.26219111777594	5.5695242166634	4.94154714234318	-0.751329784785126	-0.845523572433991	-0.474232317836143	2.64737273535194	2.82776179092477	2.92287455165447	4.14845062749941	4.2281399138302	4.25960611803281	29	31	28	0.0192036651395252	1.93877551020408	0.0348988401581931	6.44415191887736	0.0155483536952196	2.88052721088435	0.0338954041777417	6.71957826601014	0.0205371095376926	1.44	0.0344379856674867	6.28412584426443	0.0158428712456857	2.89504373177842	0.0342765465895538	6.68870186130336	0.743564849946508	1.21033434650456	106.520972644377	843.080243161094	0.658	1.88247822801901E-05	52781.4772036474	1.40191406039741E-05	39189.0813734949	2.26802978807925E-05	64154.6103343465	0.766351629951482	40.6457376212353	123.463501786626	1069.54619703931	0.7836
212.1332	212.9496	209.5672	9.0730952689807	10.1925001761099	11.0238234818959	0.00188636929440885	0.0826797854576353	0.034001234288544	2.54668998538205	2.42010644697896	2.23196384008779	5.18129611352128	5.33641304737305	5.43671862773099	46	49	51	0.00427388588088298	6.56897959183674	0.00987768896596062	8.30714436616963	0.00319347551945947	12.6594387755102	0.00963758722835639	8.7160590559386	0.00367213660974596	9.45632653061223	0.00984095620116204	8.52735290050796	0.00283704502549177	17.4698042482299	0.00937292109718654	8.86704990018742	0.856632799005518	0.495204442200909	55.6794548207976	1367.53811206461	0.7924	2.20882751745435E-05	45228.9182231196	1.89009220528221E-05	38783.3535681148	1.10335885511751E-05	22230.8788490661	0.847502437510251	35.5035971223022	60.6654676258993	1509.89928057554	0.8896
228.968	234.6176	236.3876	3.0609436453486	3.54087139557482	3.80838105236333	-0.451858416373877	-1.90931083079777	-1.793262469008	4.61892508955133	11.4082556189062	10.5891645437648	3.60496696405365	3.63357638372868	3.73455076598527	24	34	36	0.0301074552269888	1.36530612244898	0.0884533686434704	5.67500614841097	0.0209815643944653	3.49149659863946	0.0818156990142495	6.16711523448739	0.0257762598917118	2.44081632653061	0.0810508355895617	5.94248544280928	0.0208119933368038	3.13869221157851	0.0801500552288315	6.15588705225506	0.701902040927474	1.97702702702703	147.322972972973	675.866216216216	0.592	1.82681126231226E-05	54325.3263513514	1.28352761382322E-05	38096.9497160748	3.59464452869861E-05	107862.014864865	0.761775178086875	41.0236747297993	178.50591868245	1048.19814719506	0.7772
220.4008	217.5572	211.2724	11.530939222804	21.4975981951473	32.9653848489594	-0.988021376144232	-1.07658542279894	-1.35907888132453	4.37021289141748	2.933386534966	3.47361407086727	5.40644976038044	5.83996617645734	6.07651395853237	77	99	140	0.00362182423990005	25.2697959183674	0.00267800752929468	8.88487093850243	0.00292340575686055	26.0982142857142	0.00289886173453222	9.11853027670898	0.00354818825489381	7.37632653061226	0.00269128206762222	8.78342465751233	0.00269272087622799	35.0583090379009	0.00265918555696891	9.22128766521148	0.889556057484017	0.31621493105088	48.0879695672848	1580.21445553971	0.8412	2.18092693592565E-05	47170.0085592011	1.96166866250144E-05	41570.6323875944	6.20069148218432E-06	16154.444127437	0.886276151248285	33.7265725288832	55.2849807445443	1761.62644415918	0.9348
225.8796	209.1504	179.928	10.8755645297152	12.0632242721422	11.1436984883835	-0.0145671367734567	0.065868972362785	0.412452902530484	2.12393832271505	2.30373299715393	2.40627512749225	5.39487026852899	5.57018051945934	5.40829742924683	48	57	54	0.0040719700124948	4.6665306122449	0.00739365804156186	8.34916976623955	0.00301704440279512	10.7542517006802	0.00732174324725205	8.79785494504517	0.00358417326114121	7.26693877551022	0.0073692947140547	8.57733198782369	0.0028540447449964	11.1736776343191	0.00725073775370118	8.8814580991933	0.840591663823496	0.507676560900716	46.8341862845445	1292.09109518936	0.7816	2.24507812194855E-05	44646.5982599795	1.88553248286436E-05	37558.2901987376	1.1538891533748E-05	22382.2231320368	0.867679765758589	34.9107379584622	53.7158638974812	1624.39637649138	0.9052
230.3844	235.2592	235.7756	3.85162779094761	3.89307274013728	3.62044812695887	-0.526074025801602	-2.18402631680665	-2.67848630181307	3.61361093714476	11.5837985441074	14.4033312499415	3.88933775350826	3.68908077562564	3.4638189628196	25	32	33	0.0272226572261558	1.2465306122449	0.0701420235485414	5.74171779440445	0.0207592178027674	3.17899659863945	0.0672187035779732	6.15111673940356	0.0267455226988755	2.16367346938776	0.0661467222831724	5.8444332070698	0.0206909137019647	2.75843398583923	0.0656862653943378	6.13345807732622	0.679319270172948	1.79648411088573	133.377281947262	640.226504394861	0.5916	1.81840781392466E-05	54591.554428668	1.23866881244629E-05	36988.4820627037	3.24061295548561E-05	98808.3346855984	0.739030198432313	43.1109913793103	154.730603448276	939.897629310345	0.7424
225.7604	227.098	223.5444	9.14232967246314	9.52993158422452	9.53284997469277	-0.127369698004252	-0.639020454733671	-0.556352316648089	3.87201772136425	4.47725563855775	4.42270217403522	5.12349073698496	5.15370079539003	5.18520814569978	59	65	65	0.00695010412328197	6.92204081632654	0.0109584895862767	7.94498662187896	0.00582331146744415	7.90263605442177	0.0109159468751886	8.11367639382626	0.00755718450645565	4.29714285714286	0.011367778876889	7.79819411888234	0.00530790221553183	12.7955018742191	0.0107238214471686	8.29405167946086	0.848671384486204	0.603501544799176	65.918640576725	1313.4675592173	0.7768	1.9520771928801E-05	51166.7847579815	1.66056123135128E-05	43342.996420068	1.16160721601547E-05	31197.0247167868	0.817796810684445	37.4565217391304	71.2608695652174	1327.48960302457	0.8464
218.7032	202.1104	176.7768	17.4221212761248	22.9456708736093	26.0720651610109	-1.12700896008498	-1.57759406861189	-1.91725495710804	3.28856674596919	4.73053791891445	6.09623985612365	5.59308772029251	5.8357733970972	5.93949287166606	89	119	132	0.00607413577675969	8.87551020408162	0.00229291692251376	8.28663566571471	0.00451562427692168	15.0259353741496	0.00261029096075014	8.56601662196249	0.00531078717201167	5.42775510204083	0.00216899550484593	8.40381836016981	0.0043965090902531	12.283631820075	0.00228607941356206	8.67133306514035	0.87634989713695	0.4583127775037	48.0182535767144	1476.62900838678	0.8108	2.55089139782454E-05	41257.5880611742	2.28098661151435E-05	35591.0764228857	9.93741615899819E-06	21077.9284657129	0.875710289879817	34.5157342657343	58.1722027972028	1678.14947552448	0.9152
235.0244	234.1776	225.8036	2.5832933708737	2.77612287912477	3.5569969131277	-0.286281345892422	-0.139349849935402	0.19254023848712	3.33615547638586	3.0239257184313	2.44327835096864	3.39786588060742	3.49923857016302	3.83714057625962	21	21	19	0.0302204081632653	1.38204081632653	0.123128029574206	5.59176790264524	0.0246367254384747	2.15816326530612	0.119313910100708	5.85260627011308	0.0308764681382757	1.24816326530612	0.124122739759592	5.55297444918059	0.0231211797250243	2.32486463973344	0.115475043859795	5.92967193472297	0.677278014229173	1.99582753824757	147.475660639777	614.50347705146	0.5752	1.82509514541067E-05	54354.9791376912	1.23819655478908E-05	36750.9187333696	3.62420751215807E-05	109026.73713491	0.712872767302188	44.7431602456728	165.083752093802	843.672250139587	0.7164
[truncated: 1,504 more rows]
[truncated: 29 more columns]
